# Supplementary material for: Synthesis and antiproliferative activity of (Z)-1-glycosyl-3-(5-oxo-2-thioxoimidazolidin-4-ylidene)indolin-2-ones and (Z)-3-(2-glycosylsulfanyl-4-oxo-4,5-dihydro-thiazol-5-ylidene)indolin-2-ones
Source: Royal Society of Chemistry journal article supplement (doi:10.1039/c3ra44362k), 2014-01-01
Supplement: c3ra44362k1.pdf [file c3ra44362k1.pdf]

## **Synthesis and Antiproliferative Activity of (Z)-1-Glycosyl-3-(5-oxo-2-thioxoimidazolidin-4-ylidene)indolin-2-ones and (Z)-3-(2-Glycosylsulfanyl-4-oxo-4,5-dihydro-thiazol-5-ylidene)indolin-2-ones**

Friedrich Erben<sup>a</sup>, Dirk Michalik<sup>a,b</sup>, Holger Feist<sup>a</sup>, Dennis Kleeblatt<sup>a</sup>, Martin Hein<sup>a</sup>, Abdul Matin,<sup>c</sup> Jamshed Iqbal,<sup>d</sup> Peter Langer<sup>\*a,b</sup>

<sup>a</sup> Institut für Chemie, Universität Rostock, Albert-Einstein-Str. 3a, 18059 Rostock, Germany  
Fax: +49 (381)4986412, E-mail: [peter.langer@uni-rostock.de](mailto:peter.langer@uni-rostock.de)

<sup>b</sup> Leibniz-Institut für Katalyse e.V. an der Universität Rostock, Albert-Einstein-Str. 29a, 18059 Rostock, Germany

<sup>c</sup> Institute of Biomedical and Genetic Engineering, PO Box: 2891, Sector: G-9/1, Islamabad, 44000, Pakistan

<sup>d</sup> Department of Pharmaceutical Sciences, COMSATS Institute of Information Technology, Abbottabad, Postal Code 22060, Pakistan

### **Supporting Information**

Contents:

Copies of NMR Spectra

NMR Spectra of **12a** at elevated temperature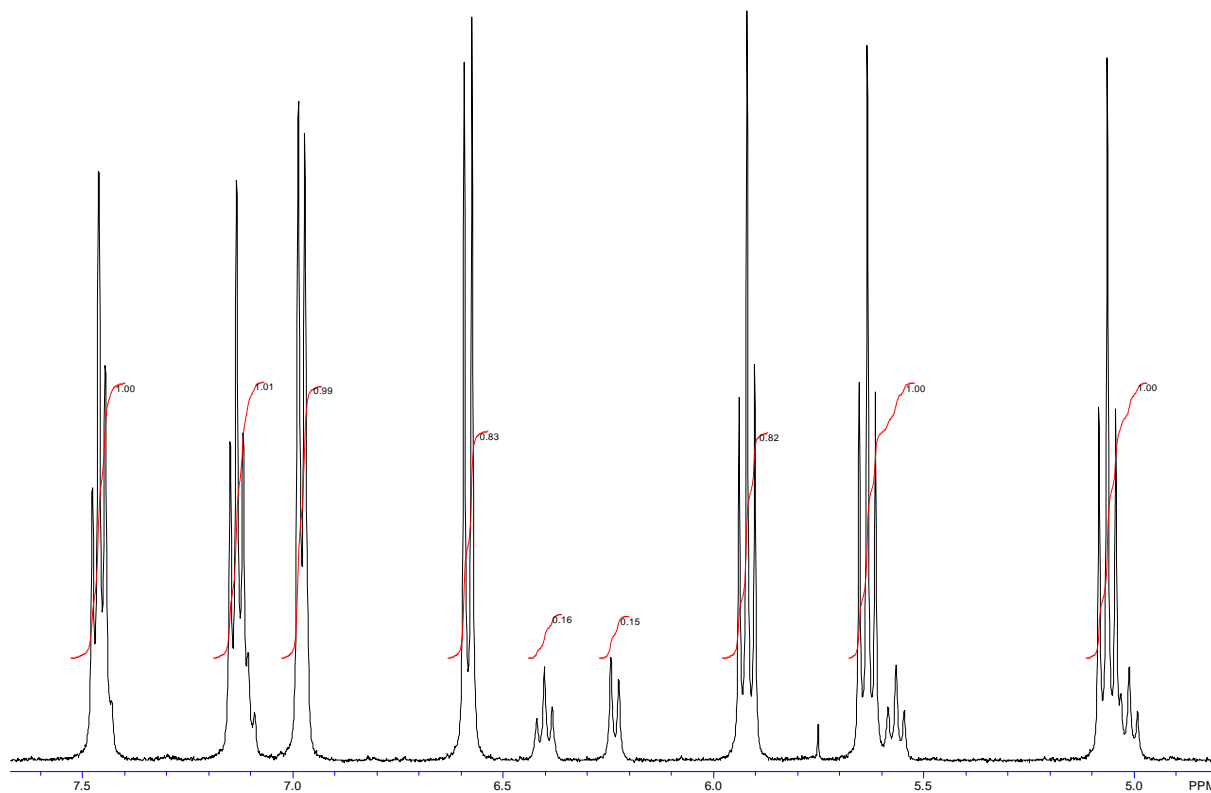

**Fig. 1:** <sup>1</sup>H-NMR-Spectrum of **12a** in DMSO-d<sub>6</sub> at 20 °C.

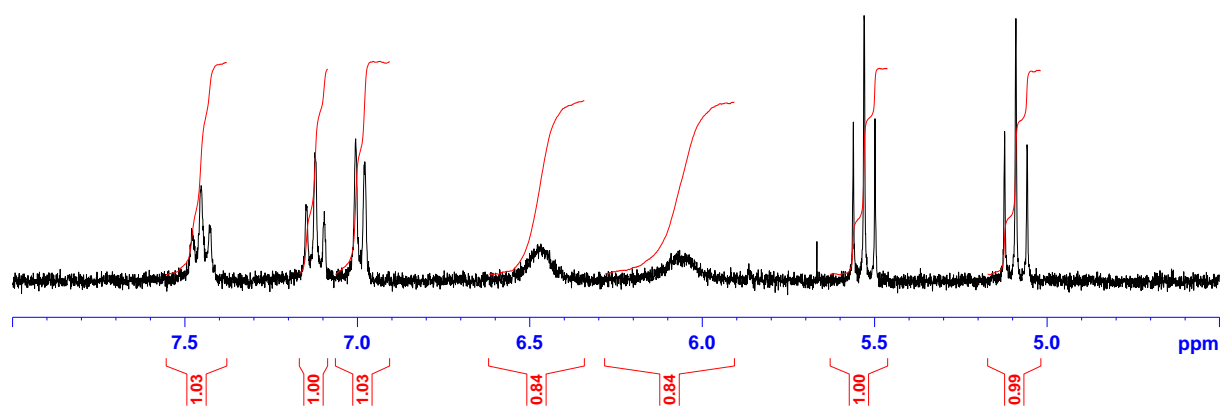

Fig. 2: <sup>1</sup>H-NMR-Spectrum of **12a** in DMSO-d<sub>6</sub> at 90 °C.

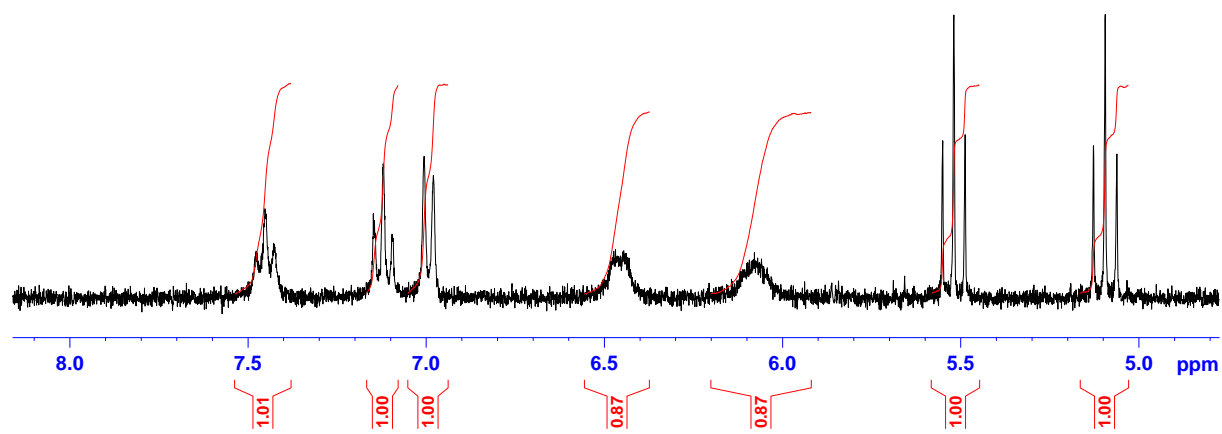

Fig. 3: <sup>1</sup>H-NMR-Spectrum of **12a** in DMSO-d<sub>6</sub> at 100 °C.

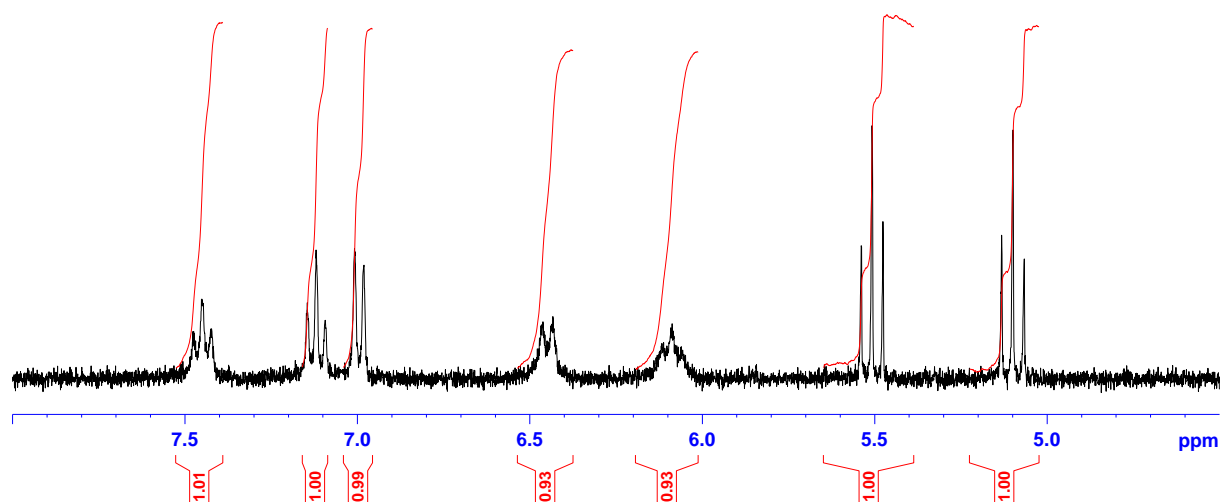

Fig. 4:  $^1\text{H-NMR}$ -Spectrum of **12a** in  $\text{DMSO-d}_6$  at  $110\text{ }^\circ\text{C}$ .

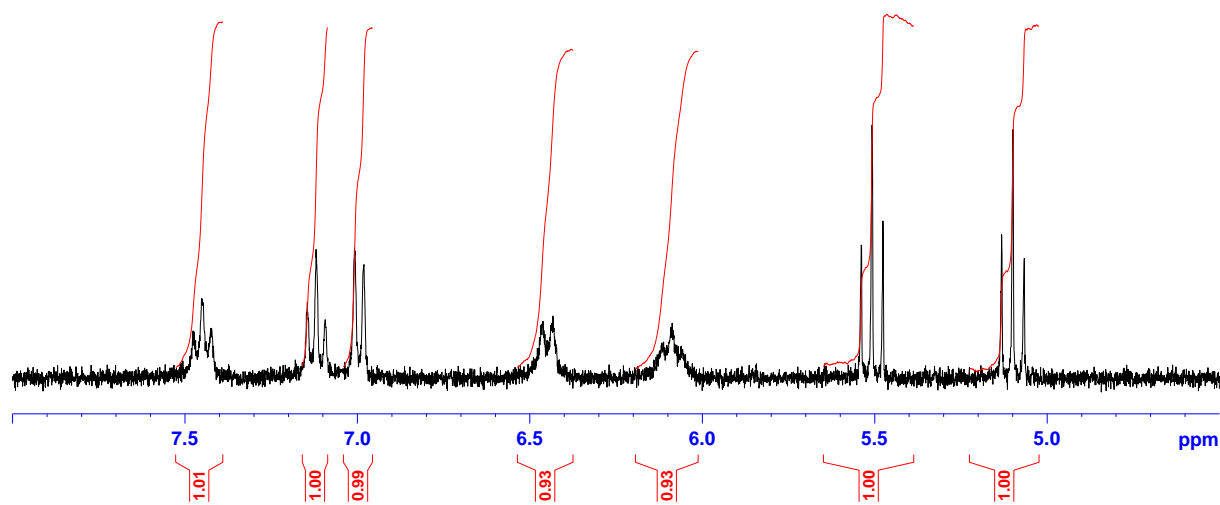

Fig. 5:  $^1\text{H-NMR}$ -Spectrum of **12a** in  $\text{DMSO-d}_6$  at  $120\text{ }^\circ\text{C}$ .

Erben 1H in CDC13

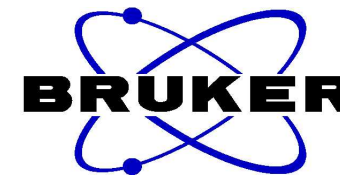

— 11.163

9.275  
8.617  
8.602  
7.540  
7.524  
7.310  
7.309  
7.294  
7.279  
7.278  
7.077  
7.062  
7.046  
5.923  
5.921  
5.591  
5.589  
5.585  
5.582  
5.327  
5.320  
5.307  
5.300  
5.251  
5.232  
5.212

2.102  
1.986  
1.808  
1.387  
1.375

**5a**

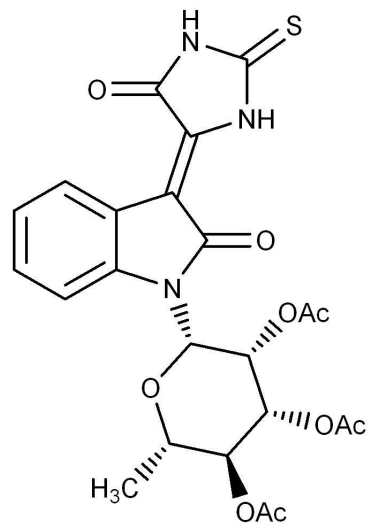

NAME 101112.503  
EXPNO 10  
PROCNO 1  
Date\_ 20101114  
Time 3.53  
INSTRUM spect  
PROBHD 5 mm BBO BB-1H  
PULPROG zg30  
TD 65536  
SOLVENT CDC13  
NS 32  
DS 2  
SWH 15015.015 Hz  
FIDRES 0.229111 Hz  
AQ 2.1824322 sec  
RG 101.6  
DW 33.300 usec  
DE 6.00 usec  
TE 300.0 K  
D1 1.00000000 sec

==== CHANNEL f1 =====  
NUC1 1H  
P1 8.60 usec  
PL1 -3.00 dB  
SFO1 500.1350013 MHz  
SI 32768  
SF 500.1300179 MHz  
WDW EM  
SSB 0  
LB 0.30 Hz  
GB 0  
PC 1.00

15 14 13 ppm

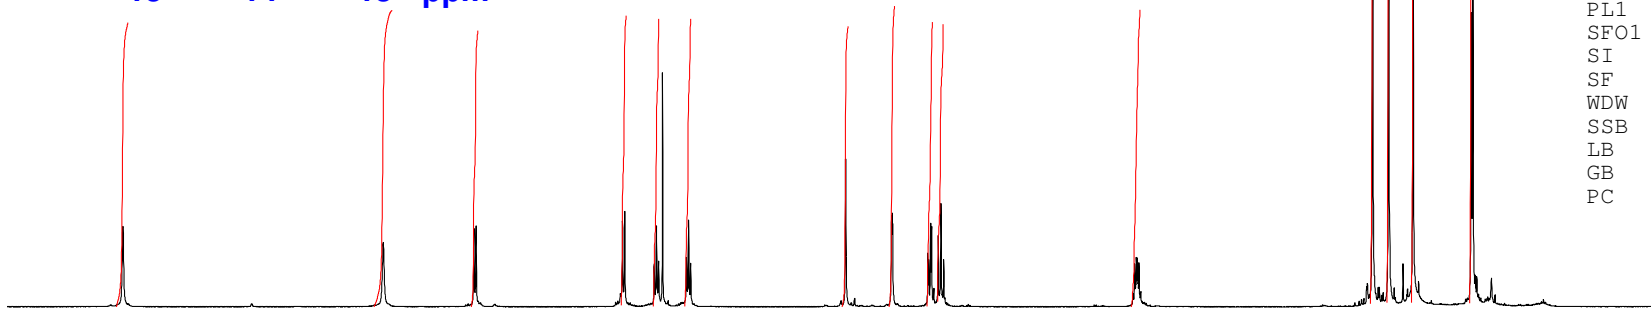

11 10 9 8 7 6 5 4 3 2 1 ppm

1.03 1.07 1.00 1.05 1.04 1.04 1.02 1.09 1.03 1.02 1.08 3.06 3.05 3.02 3.08

Erben <sup>13</sup>C in CDCl<sub>3</sub>

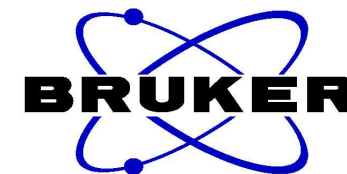

5a

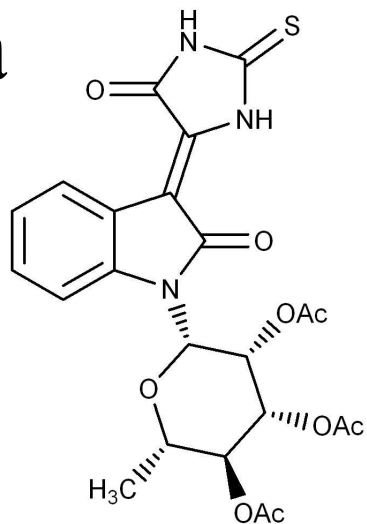

175.60  
170.07  
169.88  
169.83  
167.38  
163.61

141.08  
132.44  
130.55  
126.31  
123.37  
119.71  
113.93  
107.89

80.44  
74.12  
70.51  
70.27  
70.20

20.78  
20.74  
20.55  
17.71

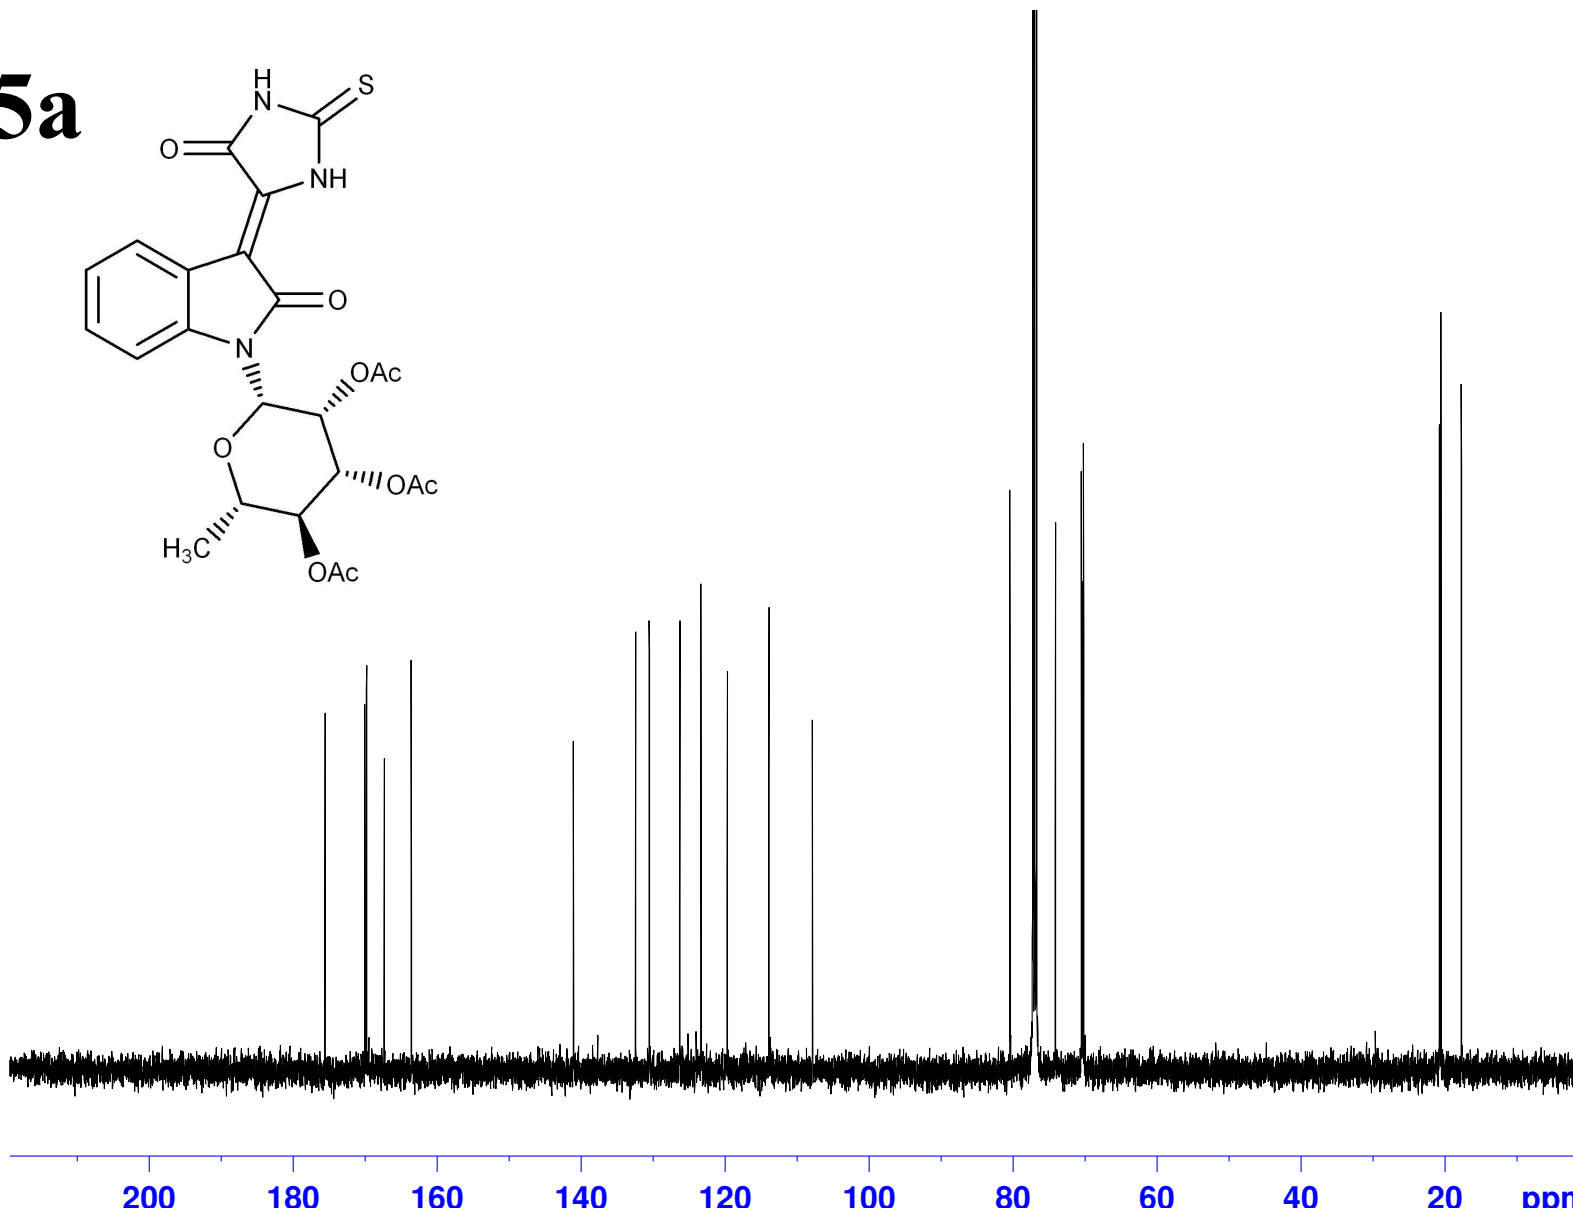

NAME 101112.503  
EXPNO 17  
PROCNO 1  
Date\_ 20101114  
Time 13.54  
INSTRUM spect  
PROBHD 5 mm BBO BB-1H  
PULPROG zgpg30  
TD 65536  
SOLVENT CDCl3  
NS 1024  
DS 4  
SWH 30030.029 Hz  
FIDRES 0.458222 Hz  
AQ 1.0912410 sec  
RG 128  
DW 16.650 usec  
DE 6.00 usec  
TE 300.0 K  
D1 2.00000000 sec  
d11 0.03000000 sec  
d12 0.00002000 sec

==== CHANNEL f1 =====  
NUC1 13C  
P1 9.00 usec  
PL1 4.80 dB  
SFO1 125.7703643 MHz

==== CHANNEL f2 =====  
CPDPRG2 waltz16  
NUC2 1H  
PCPD2 80.00 usec  
PL2 -3.00 dB  
PL12 17.50 dB  
PL13 20.00 dB  
SFO2 500.1320005 MHz  
SI 32768  
SF 125.7577934 MHz  
WDW EM  
SSB 0  
LB 1.00 Hz  
GB 0  
PC 1.40

Erben 1H CDC13

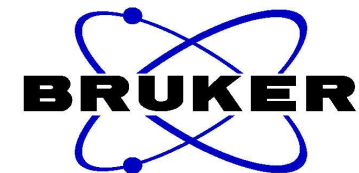

5b

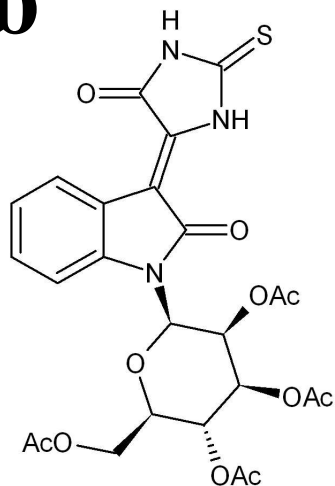

11.092  
9.232  
8.543  
8.540  
8.511  
8.509  
7.490  
7.458  
7.302  
7.297  
7.271  
7.267  
7.239  
7.234  
7.064  
7.060  
7.033  
7.029  
7.002  
6.998  
5.957  
5.951  
5.594  
5.589  
5.583  
5.578  
4.430  
4.420  
4.380  
4.371  
4.346  
4.324  
4.297  
4.275  
2.114  
1.994  
1.813

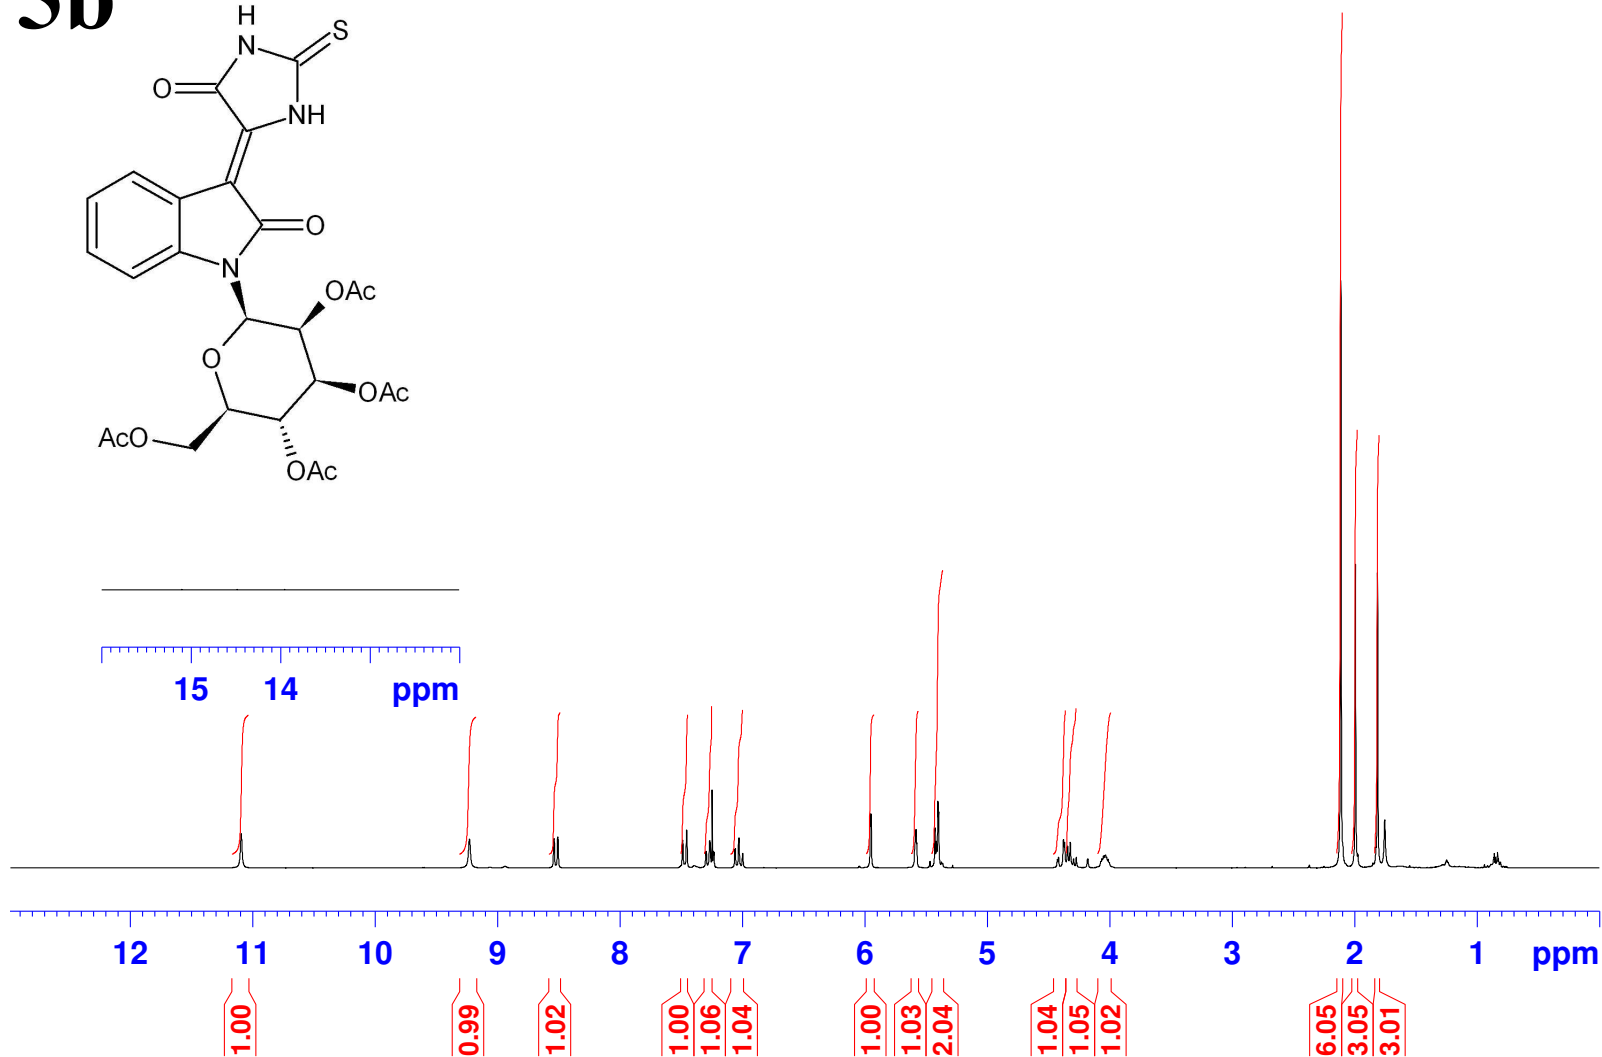

NAME 110609.217  
EXPNO 10  
PROCNO 1  
Date\_ 20110609  
Time 14.44  
INSTRUM spect  
PROBHD 5 mm PABBO BB-  
PULPROG zg30  
TD 65536  
SOLVENT CDC13  
NS 16  
DS 2  
SWH 5165.289 Hz  
FIDRES 0.078816 Hz  
AQ 6.3439350 sec  
RG 724  
DW 96.800 usec  
DE 10.00 usec  
TE 297.2 K  
D1 1.00000000 sec  
TD0 1

===== CHANNEL f1 =====  
NUC1 1H  
P1 10.00 usec  
PL1 -2.50 dB  
SFO1 250.1315447 MHz  
SI 32768  
SF 250.1300031 MHz  
WDW EM  
SSB 0  
LB 0.30 Hz  
GB 0  
PC 1.00

Erben 13C CDC13

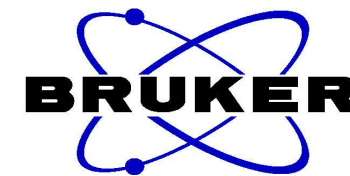

5b

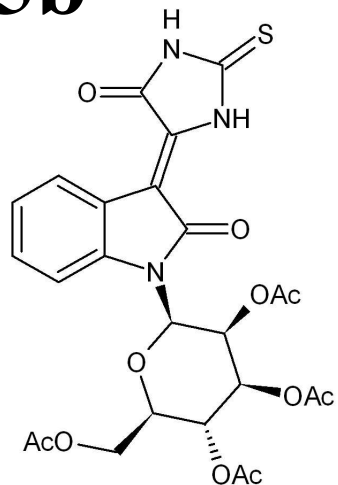

175.86  
170.69  
169.85  
167.11  
163.36

140.62  
132.45  
130.40  
126.23  
123.40  
119.61  
113.74  
107.33

80.43  
75.76  
70.59  
70.03  
65.50  
62.42

20.87  
20.74  
20.71  
20.53

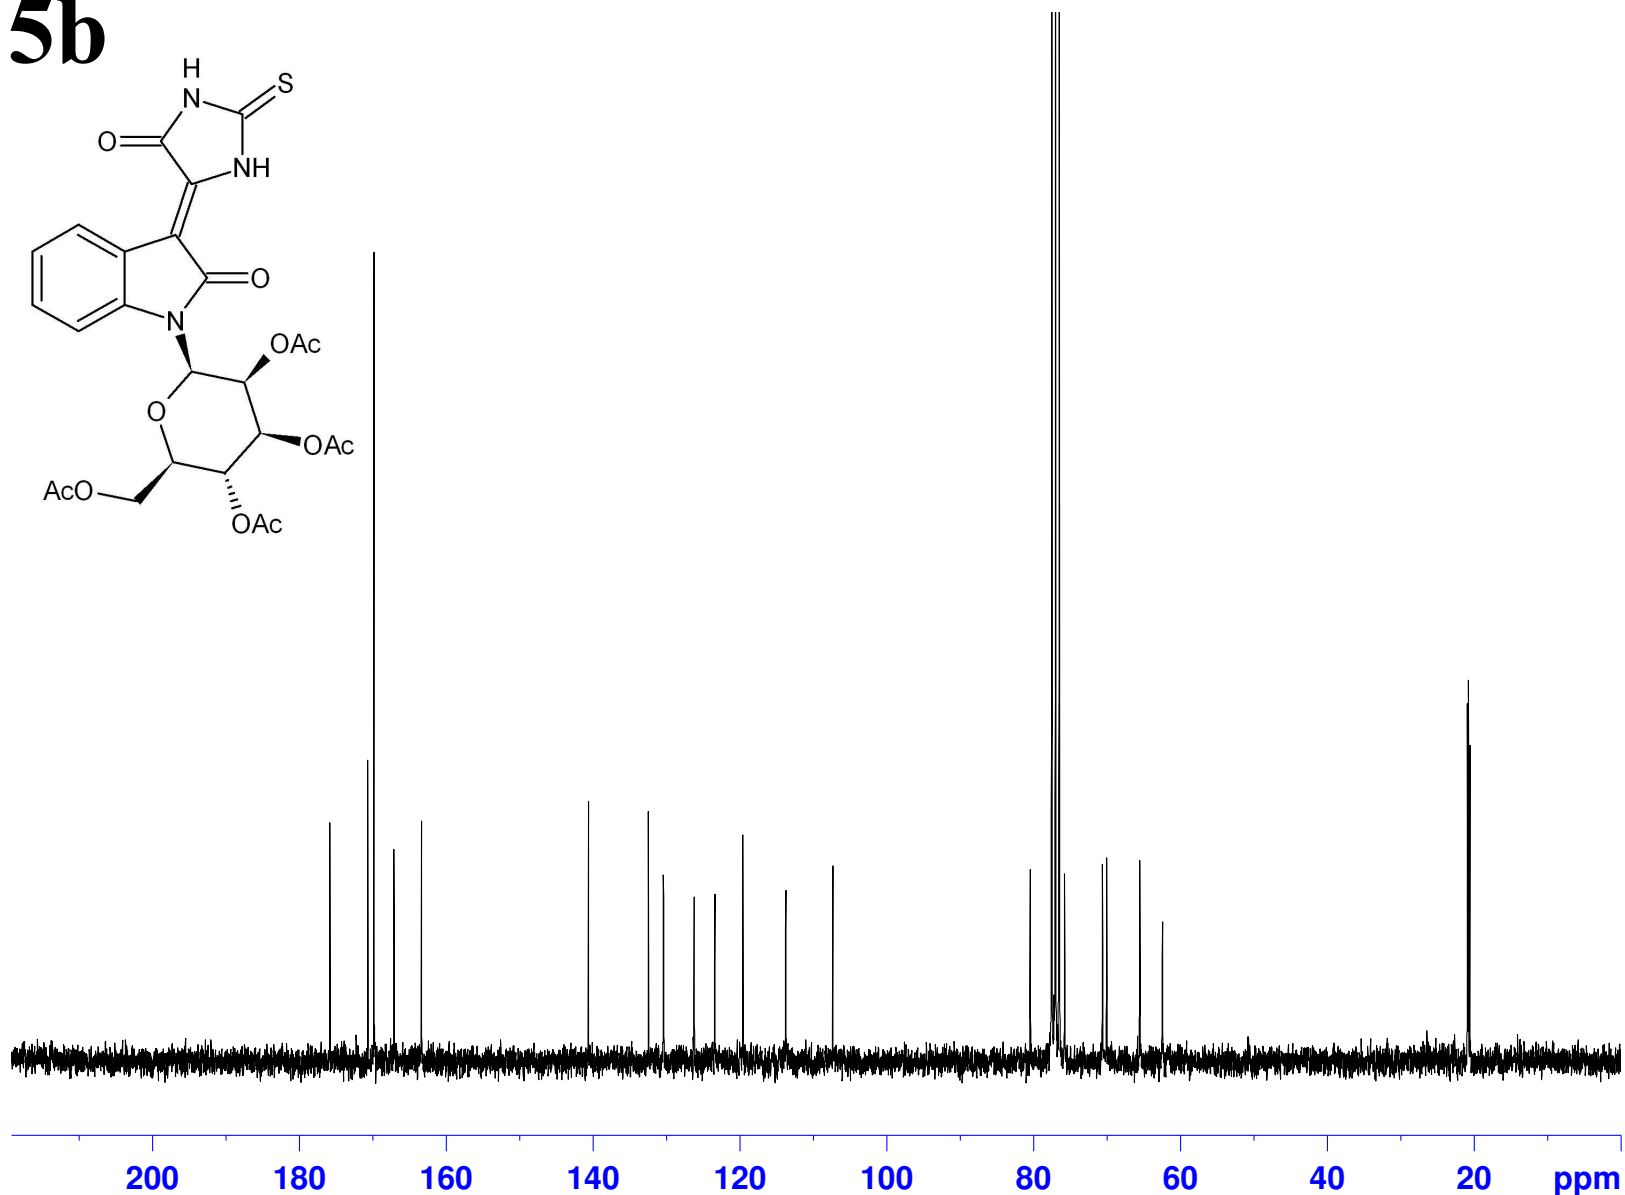

NAME 110610.208  
EXPNO 10  
PROCNO 1  
Date\_ 20110611  
Time 1.22  
INSTRUM spect  
PROBHD 5 mm PABBO BB-  
PULPROG zgpg30  
TD 65536  
SOLVENT CDC13  
NS 1024  
DS 4  
SWH 15000.000 Hz  
FIDRES 0.228882 Hz  
AQ 2.1845834 sec  
RG 2050  
DW 33.333 usec  
DE 10.00 usec  
TE 299.4 K  
D1 2.00000000 sec  
d11 0.03000000 sec  
DELTA 1.89999998 sec  
TD0 1

===== CHANNEL f1 =====  
NUC1 13C  
P1 10.00 usec  
PL1 -1.00 dB  
SFO1 62.9015280 MHz

===== CHANNEL f2 =====  
CPDPRG2 waltz16  
NUC2 1H  
PCPD2 70.00 usec  
PL12 15.00 dB  
PL13 15.00 dB  
PL2 -2.50 dB  
SFO2 250.1310005 MHz  
SI 32768  
SF 62.8952402 MHz  
WDW EM  
SSB 0  
LB 1.00 Hz  
GB 0  
PC 1.40



Erben 1H CDC13

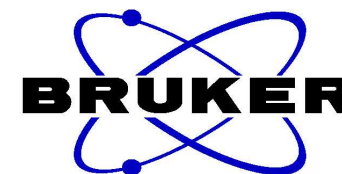

11.192  
9.220  
8.613  
8.608  
8.547  
8.541  
7.449  
7.421  
7.221  
7.216  
7.185  
7.179  
7.157  
7.151  
7.130  
5.904  
5.900  
5.722  
5.585  
5.580  
5.574  
5.570  
5.325  
5.314  
5.291  
5.280  
5.258  
5.227  
5.194  
5.026  
2.957  
2.934  
2.911  
2.888  
2.145  
2.141  
2.101  
2.050  
1.985  
1.812  
1.398  
1.376  
1.356  
1.274  
1.262  
1.255  
1.239  
1.232

5c

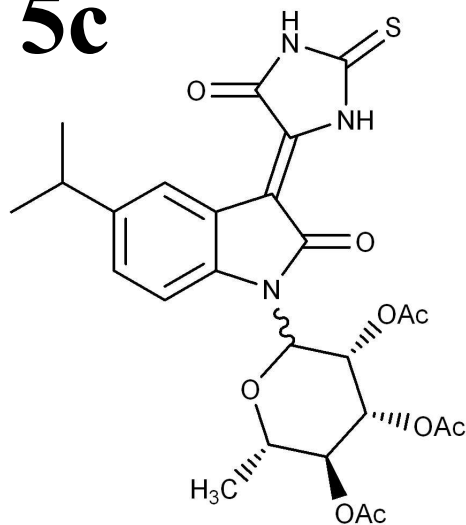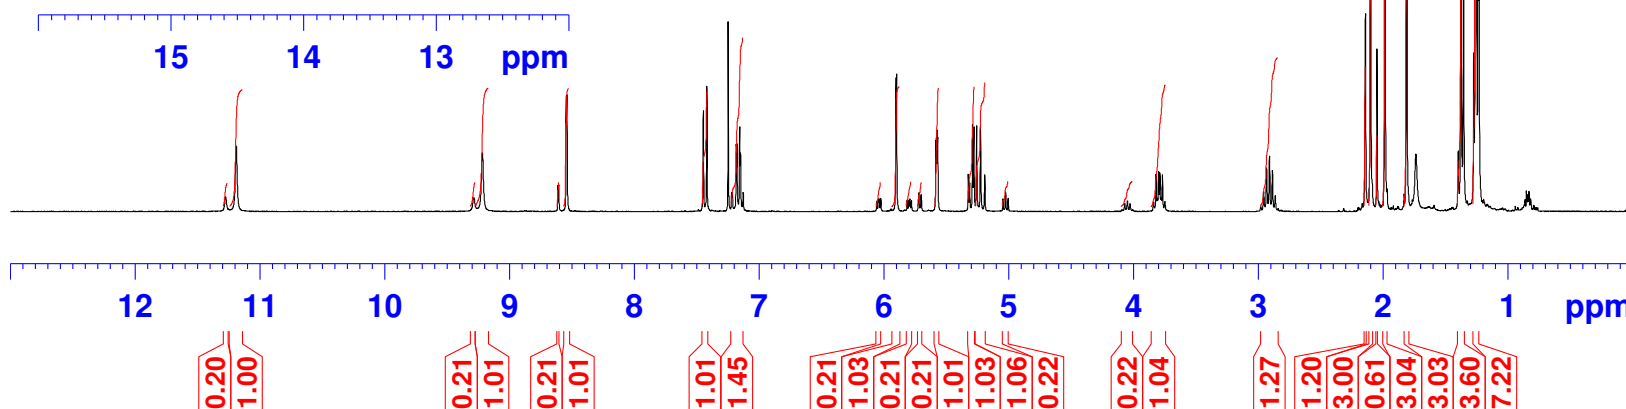

NAME 110621.u317  
EXPNO 10  
PROCNO 1  
Date\_ 20110621  
Time 14.05  
INSTRUM spect  
PROBHD 5 mm PABBO BB-  
PULPROG zg30  
TD 65536  
SOLVENT CDC13  
NS 16  
DS 2  
SWH 6188.119 Hz  
FIDRES 0.094423 Hz  
AQ 5.2953587 sec  
RG 128  
DW 80.800 usec  
DE 10.00 usec  
TE 298.2 K  
D1 1.0000000 sec  
TD0 1

===== CHANNEL f1 =====  
NUC1 1H  
P1 10.00 usec  
PL1 0.00 dB  
PL1W 11.25325108 W  
SFO1 300.1318534 MHz  
SI 32768  
SF 300.1300117 MHz  
WDW EM  
SSB 0  
LB 0.30 Hz  
GB 0  
PC 1.00

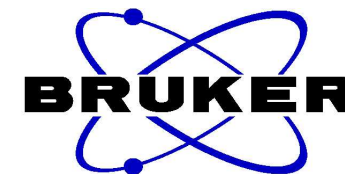

5c

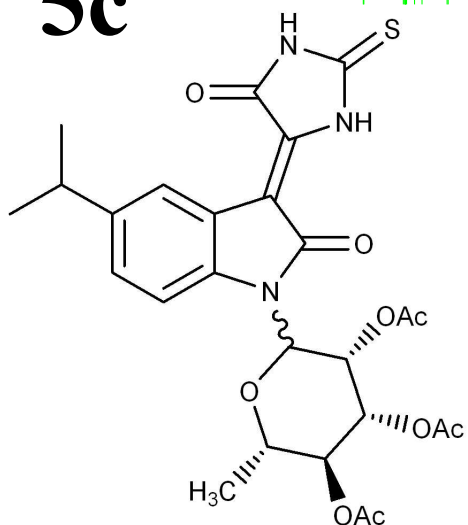

175.71  
175.67  
170.14  
169.90  
169.88  
169.84  
169.79  
169.63  
168.57  
167.52  
163.97  
163.88  
144.68  
144.14  
139.43  
139.11  
132.25  
132.18  
129.48  
128.82  
124.71  
124.25  
119.82  
119.74  
113.74  
108.82  
108.43

80.31  
74.03  
71.54  
70.92  
70.55  
70.29  
70.25  
69.20  
66.65

33.81  
33.74  
24.04  
23.96  
20.92  
20.78  
20.75  
20.54  
17.70  
16.49

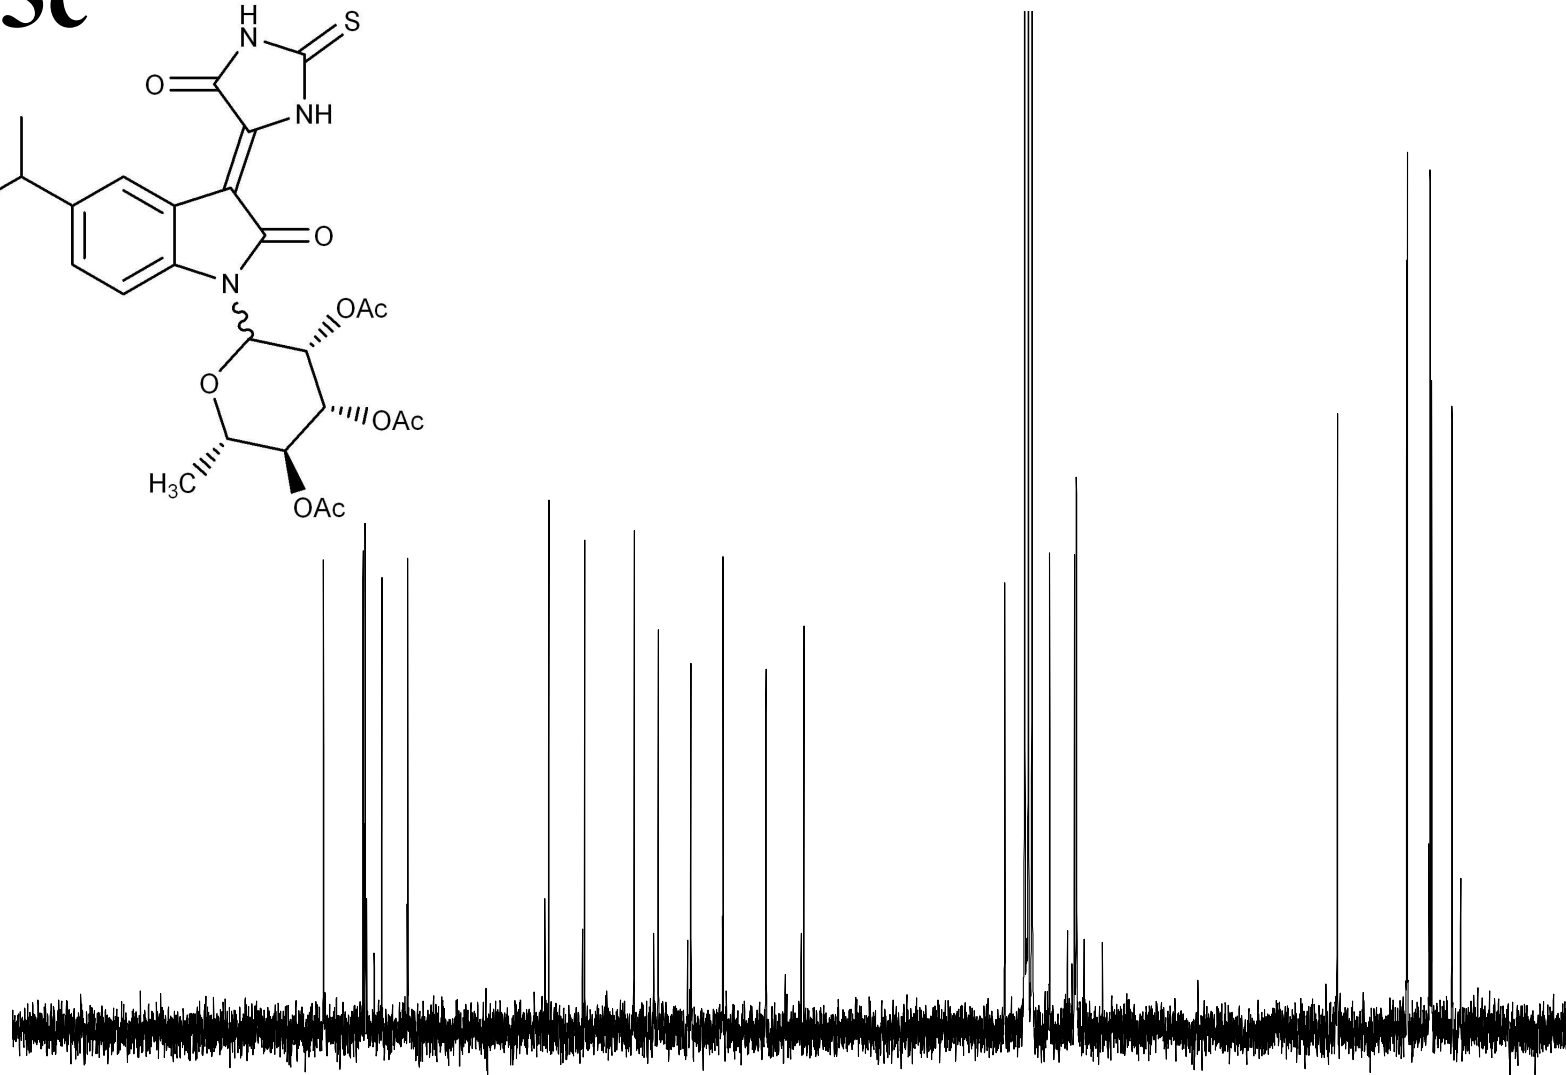

NAME 110622.205  
EXPNO 10  
PROCNO 1  
Date\_ 20110622  
Time 20.28  
INSTRUM spect  
PROBHD 5 mm PABBO BB-  
PULPROG zgpg30  
TD 65536  
SOLVENT CDCl3  
NS 1024  
DS 4  
SWH 15000.000 Hz  
FIDRES 0.228882 Hz  
AQ 2.1845834 sec  
RG 2050  
DW 33.333 use  
DE 10.00 use  
TE 300.3 K  
D1 2.0000000 sec  
d11 0.03000000 sec  
DELTA 1.89999998 sec  
TD0 1

==== CHANNEL f1 =====  
NUC1 13C  
P1 10.00 use  
PL1 -1.00 dB  
SFO1 62.9015280 MHz

==== CHANNEL f2 =====  
CPDPRG2 waltz16  
NUC2 1H  
PCPD2 70.00 use  
PL12 15.00 dB  
PL13 15.00 dB  
PL2 -2.50 dB  
SFO2 250.1310005 MHz  
SI 32768  
SF 62.8952409 MHz  
WDW EM  
SSB 0  
LB 1.00 Hz  
GB 0  
PC 1.40

200 180 160 140 120 100 80 60 40 20 ppm

Erben 1H CDC13

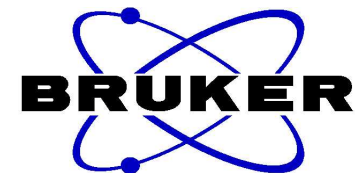

11.219  
11.099  
9.568  
9.464  
8.596  
8.484  
7.434  
7.395  
7.368  
7.229  
7.202  
7.142  
7.114  
6.088  
6.071  
6.058  
5.948  
5.855  
5.843  
5.832  
5.820  
5.735  
5.718  
5.590  
5.226  
5.205  
5.183  
4.604  
4.578  
4.561  
4.535  
2.947  
2.924  
2.900  
2.877  
2.854  
2.832  
2.147  
2.135  
2.107  
2.064  
2.005  
1.988  
1.811

5d

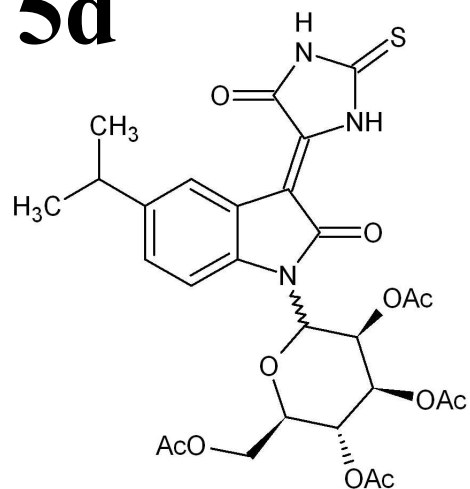

15 14 ppm

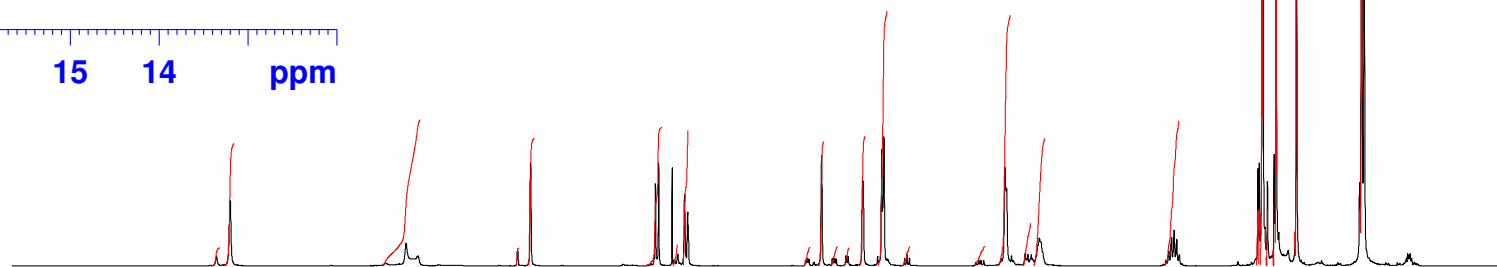

12 11 10 9 8 7 6 5 4 3 2 1 ppm

0.15  
0.98  
1.17  
0.15  
1.02  
1.11  
0.17  
1.09  
0.15  
1.00  
0.16  
0.15  
1.04  
2.05  
0.16  
0.16  
2.01  
0.34  
1.02  
1.17  
0.44  
0.46  
6.01  
0.45  
0.46  
3.02  
3.01  
6.91

NAME 110616.u331  
EXPNO 10  
PROCNO 1  
Date\_ 20110616  
Time 18.26  
INSTRUM spect  
PROBHD 5 mm PABBO BB-  
PULPROG zg30  
TD 65536  
SOLVENT CDC13  
NS 16  
DS 2  
SWH 6188.119 Hz  
FIDRES 0.094423 Hz  
AQ 5.2953587 sec  
RG 80.6  
DW 80.800 usec  
DE 10.00 usec  
TE 298.2 K  
D1 1.00000000 sec  
TD0 1

===== CHANNEL f1 =====  
NUC1 1H  
P1 10.00 usec  
PL1 0.00 dB  
PL1W 11.25325108 W  
SFO1 300.1318534 MHz  
SI 32768  
SF 300.1300122 MHz  
WDW EM  
SSB 0  
LB 0.30 Hz  
GB 0  
PC 1.00

Erben 13C CDC13

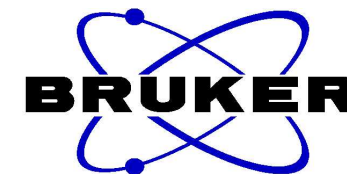

# 5d

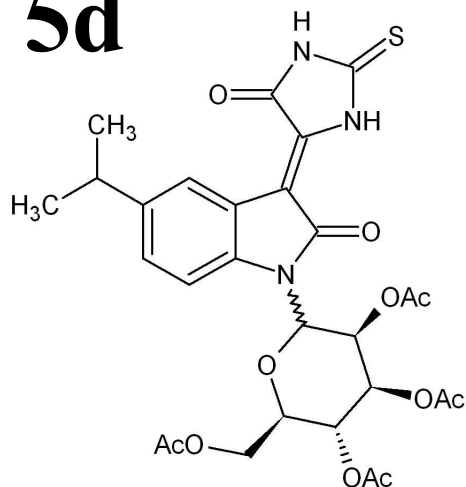

175.74  
170.70  
169.83  
167.27  
163.53  
  
144.13  
138.74  
132.14  
128.70  
124.19  
119.65  
113.60  
108.03  
  
80.35  
75.72  
70.59  
70.02  
65.47  
62.41  
  
33.70  
23.96  
20.85  
20.74  
20.71  
20.53

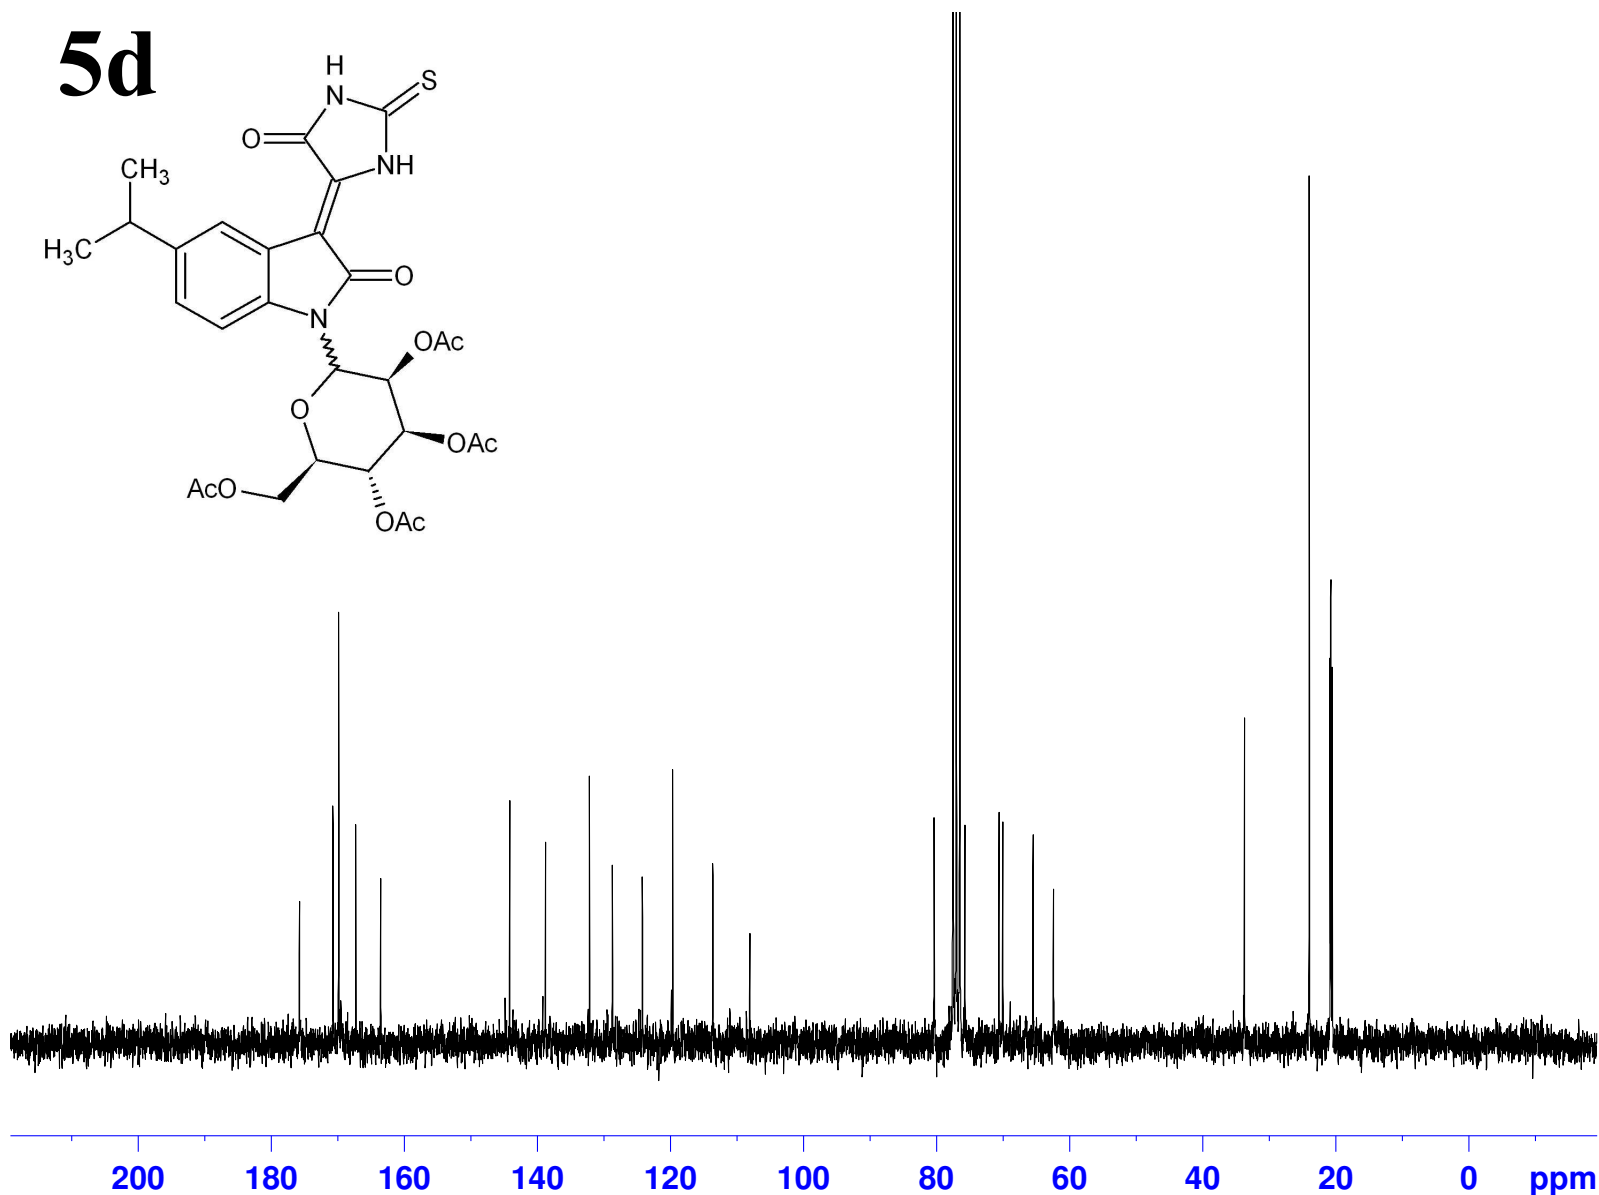

NAME 110615.206  
EXPNO 10  
PROCNO 1  
Date\_ 20110615  
Time 18.40  
INSTRUM spect  
PROBHD 5 mm PABBO BB-  
PULPROG zgpg30  
TD 65536  
SOLVENT CDC13  
NS 1024  
DS 4  
SWH 15000.000 Hz  
FIDRES 0.228882 Hz  
AQ 2.1845834 sec  
RG 2050  
DW 33.333 usec  
DE 10.00 usec  
TE 298.4 K  
D1 2.0000000 sec  
d11 0.0300000 sec  
DELTA 1.89999998 sec  
TD0 1

==== CHANNEL f1 =====  
NUC1 13C  
P1 10.00 usec  
PL1 -1.00 dB  
SFO1 62.9015280 MHz

==== CHANNEL f2 =====  
CPDPRG2 waltz16  
NUC2 1H  
PCPD2 70.00 usec  
PL12 15.00 dB  
PL13 15.00 dB  
PL2 -2.50 dB  
SFO2 250.1310005 MHz  
SI 32768  
SF 62.8952407 MHz  
WDW EM  
SSB 0  
LB 1.00 Hz  
GB 0  
PC 1.40

Erben 1H in CDCL3

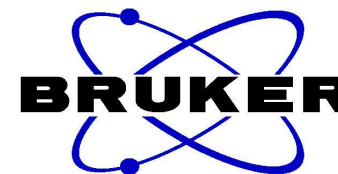

6.548  
6.161  
6.142  
5.923  
5.905  
5.886  
5.632  
5.368  
5.349  
5.330  
5.222  
5.203  
5.183

4.207  
4.200  
3.898  
3.862  
3.841  
3.809  
3.805

2.071  
2.033  
2.015  
1.942

10a

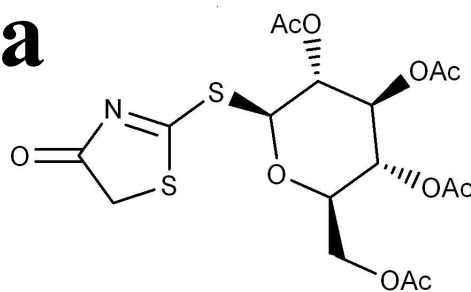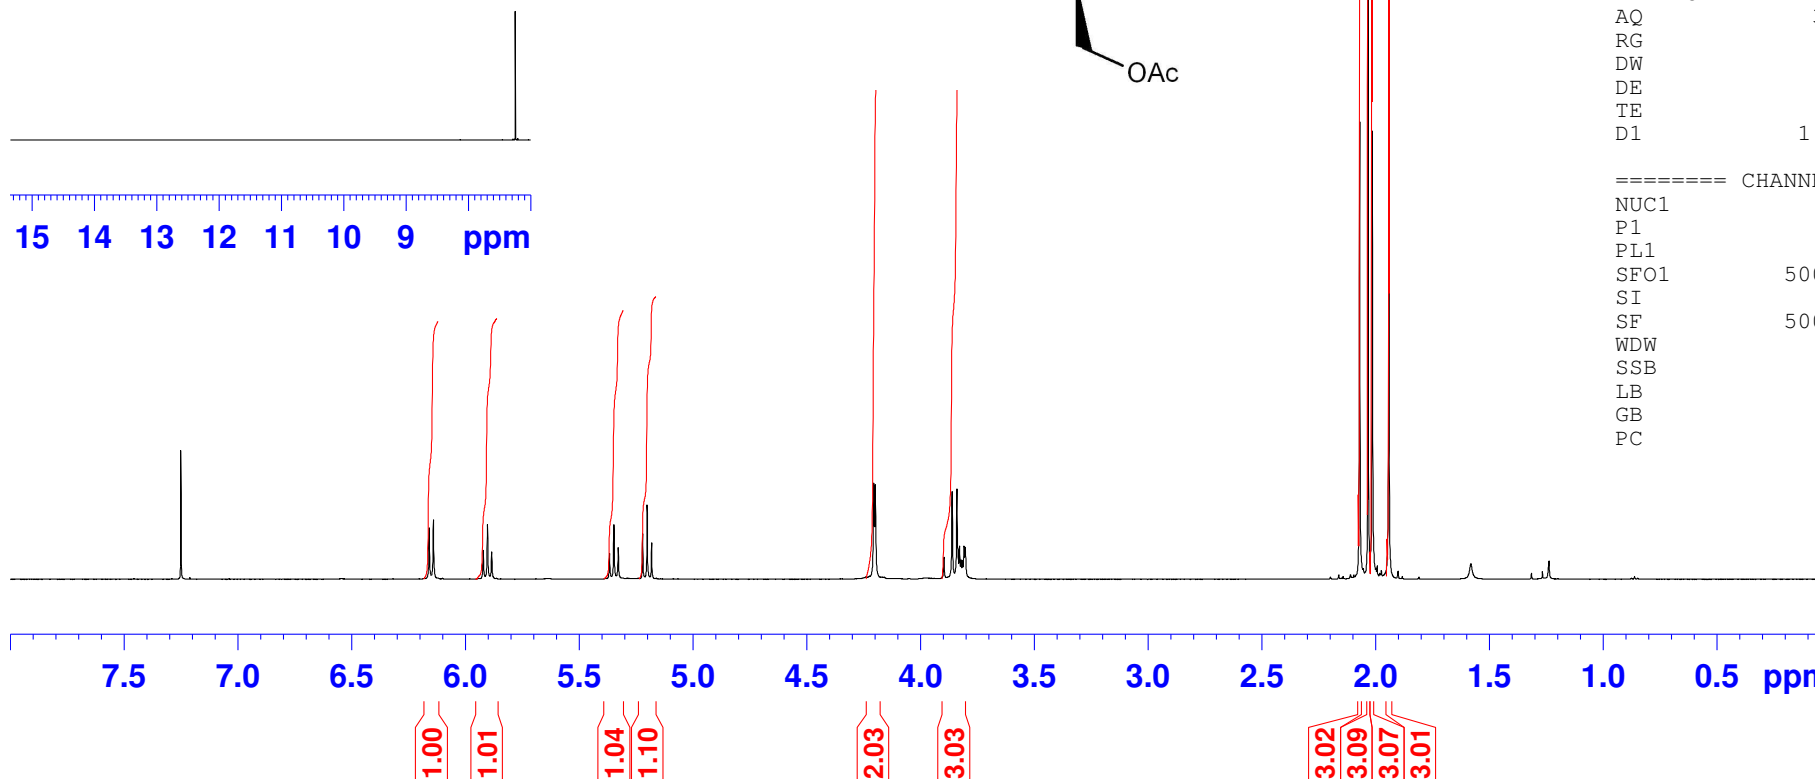

NAME 100709.503  
EXPNO 10  
PROCNO 1  
Date\_ 20100709  
Time 15.19  
INSTRUM spect  
PROBHD 5 mm BBO BB-1H  
PULPROG zg30  
TD 65536  
SOLVENT DMSO  
NS 16  
DS 2  
SWH 10330.578 Hz  
FIDRES 0.157632 Hz  
AQ 3.1720407 sec  
RG 143.7  
DW 48.400 usec  
DE 6.00 usec  
TE 300.0 K  
D1 1.00000000 sec

==== CHANNEL f1 =====  
NUC1 1H  
P1 8.60 usec  
PL1 -3.00 dB  
SFO1 500.1330885 MHz  
SI 32768  
SF 500.1300182 MHz  
WDW EM  
SSB 0  
LB 0.30 Hz  
GB 0  
PC 1.00

Erben 13C in CDCL3

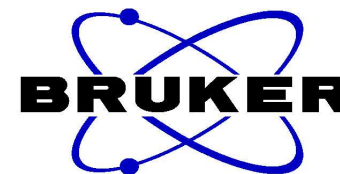

201.46

172.00  
170.56  
170.02  
169.91  
169.34

82.46

74.79  
72.90  
67.85  
67.73  
61.51

33.56

20.68  
20.54  
20.52  
20.35

10a

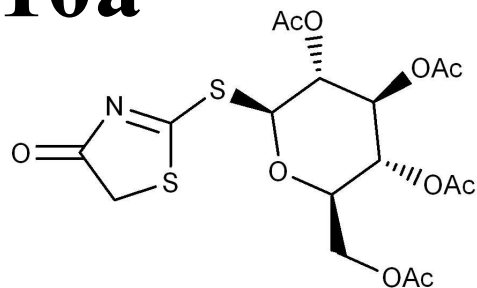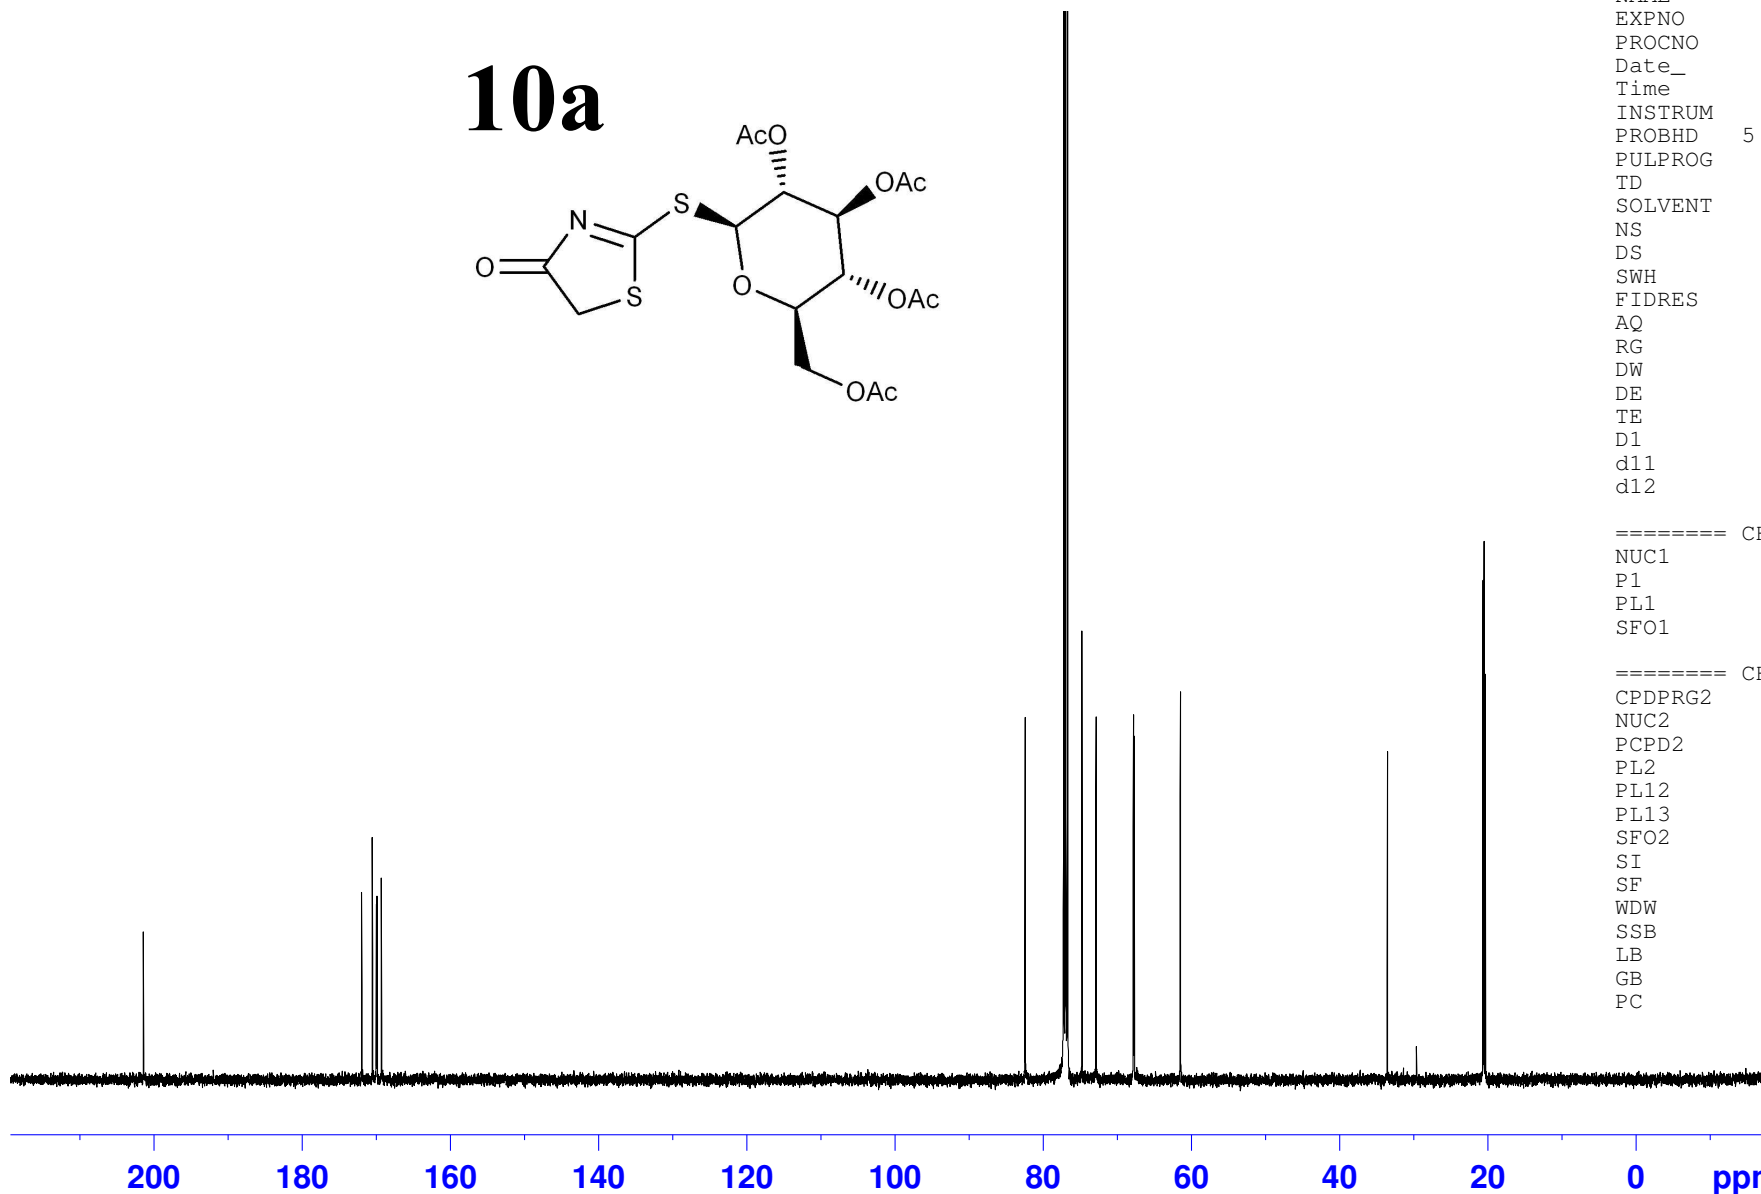

NAME 100709.503  
EXPNO 16  
PROCNO 1  
Date\_ 20100710  
Time 4.55  
INSTRUM spect  
PROBHD 5 mm BBO BB-1H  
PULPROG zgpg30  
TD 65536  
SOLVENT CDCl3  
NS 4096  
DS 4  
SWH 30030.029 Hz  
FIDRES 0.458222 Hz  
AQ 1.0912410 sec  
RG 161.3  
DW 16.650 usec  
DE 6.00 usec  
TE 300.0 K  
D1 2.00000000 sec  
d11 0.03000000 sec  
d12 0.00002000 sec

==== CHANNEL f1 =====  
NUC1 13C  
P1 9.00 usec  
PL1 4.80 dB  
SFO1 125.7703643 MHz

==== CHANNEL f2 =====  
CPDPRG2 waltz16  
NUC2 1H  
PCPD2 80.00 usec  
PL2 -3.00 dB  
PL12 17.50 dB  
PL13 20.00 dB  
SFO2 500.1320005 MHz  
SI 32768  
SF 125.7577910 MHz  
WDW EM  
SSB 0  
LB 1.00 Hz  
GB 0  
PC 1.40

Erben 1H CDC13

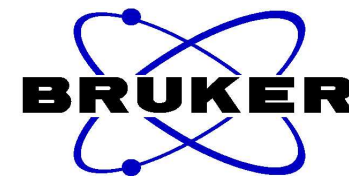

6.601  
6.565  
6.529  
6.186  
6.149  
5.974  
5.937  
5.900  
5.696  
5.659  
5.509  
5.471  
5.434  
5.328  
5.288  
5.249  
5.181  
5.142  
5.104  
4.864  
4.655  
4.615  
4.308  
4.301  
4.258  
4.251  
4.074  
4.057  
4.024  
4.007

1.206  
1.150  
1.112  
1.056

10b

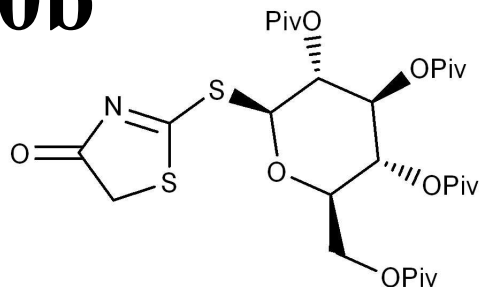

NAME 100709.212  
EXPNO 10  
PROCNO 1  
Date\_ 20100709  
Time 11.16  
INSTRUM spect  
PROBHD 5 mm PABBO BB-  
PULPROG zg30  
TD 65536  
SOLVENT CDC13  
NS 16  
DS 2  
SWH 5165.289 Hz  
FIDRES 0.078816 Hz  
AQ 6.3439350 sec  
RG 645  
DW 96.800 usec  
DE 10.00 usec  
TE 298.2 K  
D1 1.00000000 sec  
TD0 1

===== CHANNEL f1 =====  
NUC1 1H  
P1 10.00 usec  
PL1 -2.50 dB  
SFO1 250.1315447 MHz  
SI 32768  
SF 250.1300031 MHz  
WDW EM  
SSB 0  
LB 0.30 Hz  
GB 0  
PC 1.00

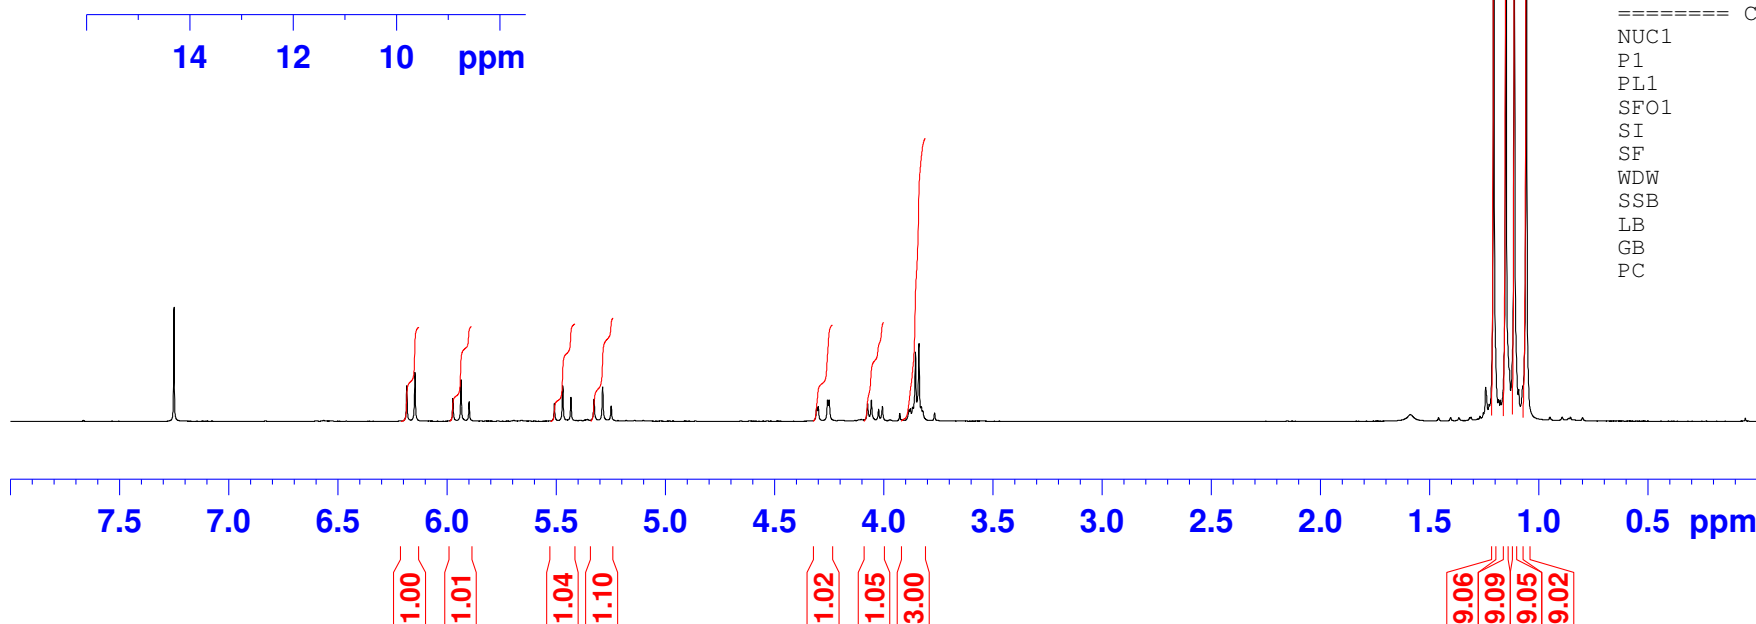

Erben 13C CDC13

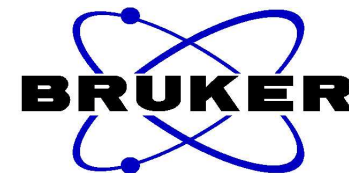

# 10b

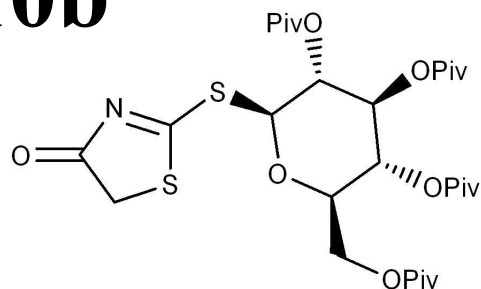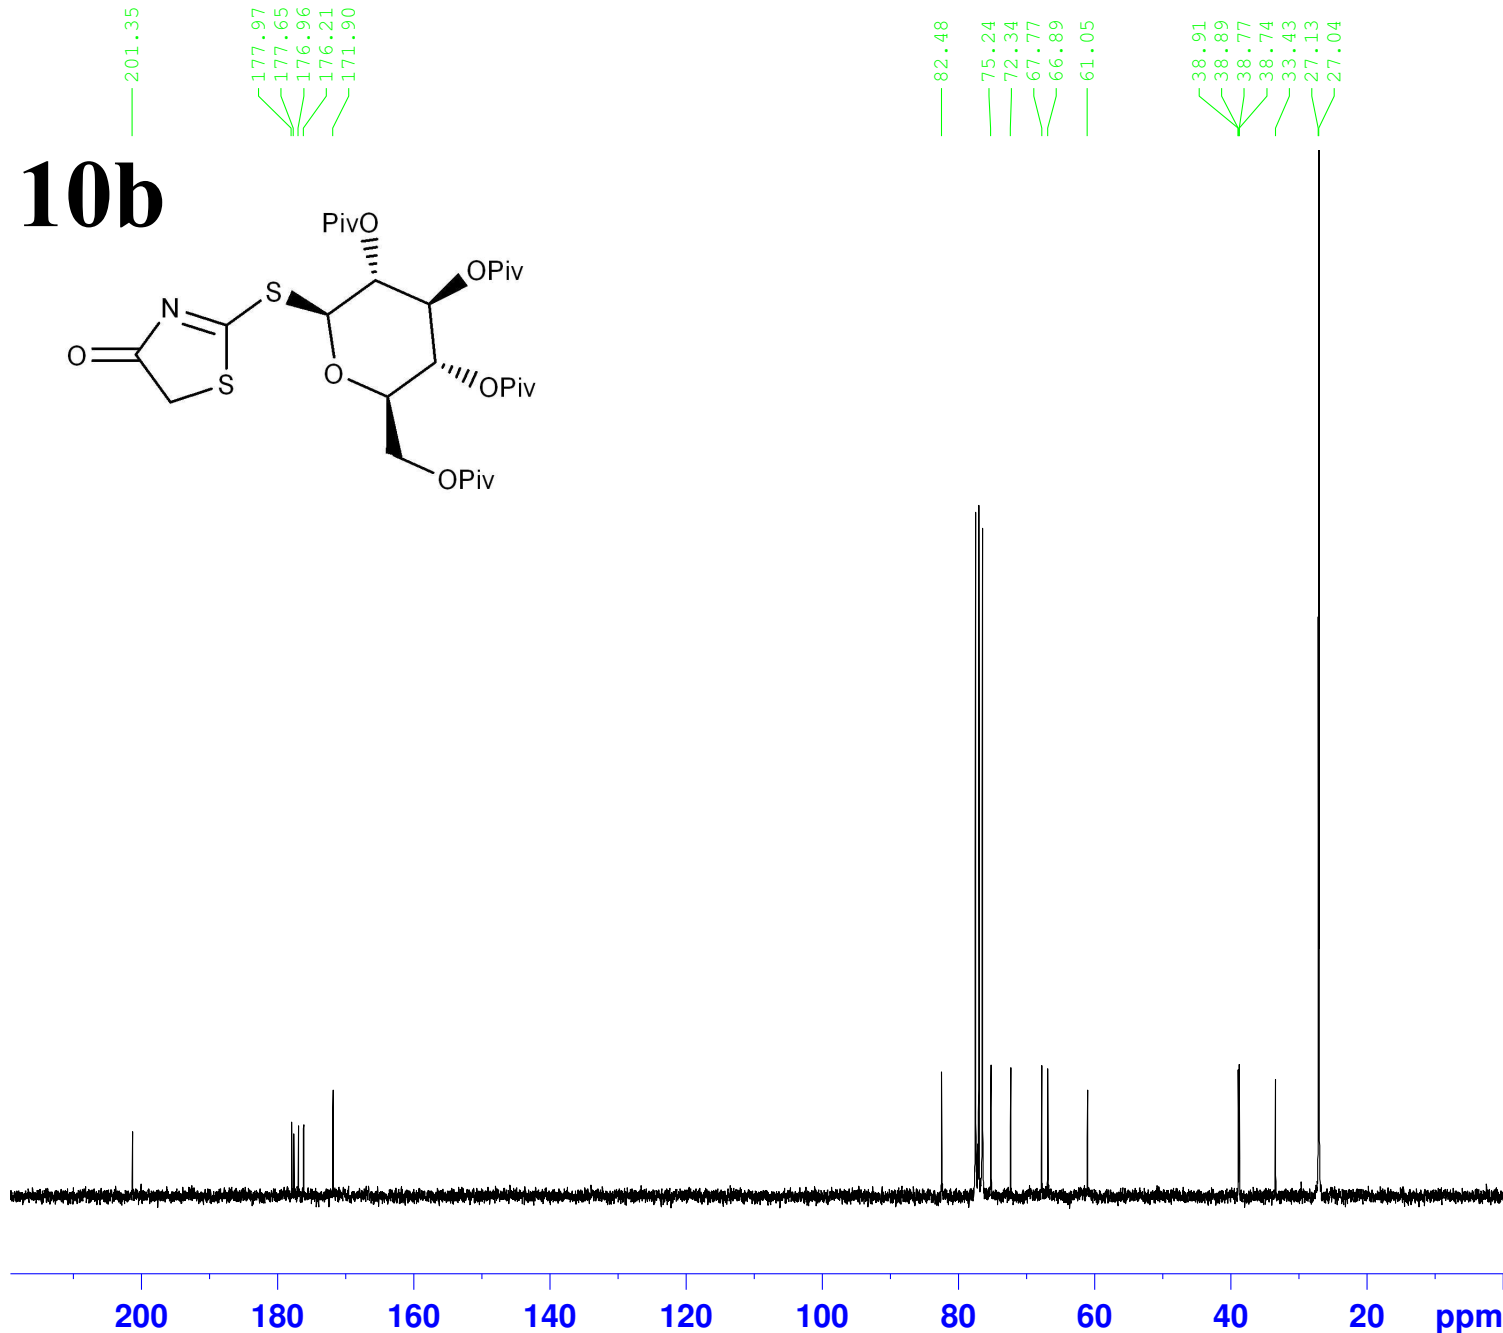

```
NAME 100709.213
EXPNO 10
PROCNO 1
Date_ 20100709
Time 17.53
INSTRUM spect
PROBHD 5 mm PABBO BB-
PULPROG zgpg30
TD 65536
SOLVENT CDC13
NS 1024
DS 4
SWH 15000.000 Hz
FIDRES 0.228882 Hz
AQ 2.1845834 sec
RG 2050
DW 33.333 usec
DE 10.00 usec
TE 300.6 K
D1 2.0000000 sec
d11 0.0300000 sec
DELTA 1.89999998 sec
TD0 1
```

```
===== CHANNEL f1 =====
NUC1 13C
P1 10.00 usec
PL1 -1.00 dB
SFO1 62.9015280 MHz
```

```
===== CHANNEL f2 =====
CPDPRG2 waltz16
NUC2 1H
PCPD2 70.00 usec
PL12 15.00 dB
PL13 15.00 dB
PL2 -2.50 dB
SFO2 250.1310005 MHz
SI 32768
SF 62.8952384 MHz
WDW EM
SSB 0
LB 1.00 Hz
GB 0
PC 1.40
```



Erben 1H in CDCl3

6.108  
6.090  
5.903  
5.885  
5.866  
5.497  
5.478  
5.459  
5.167  
5.156  
5.147  
5.136  
5.127  
5.116  
4.212  
4.201  
4.189  
4.178  
3.898  
3.862  
3.829  
3.793  
3.462  
3.440  
3.418

# 10c

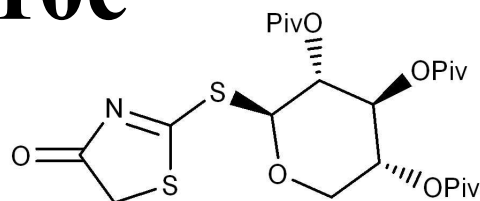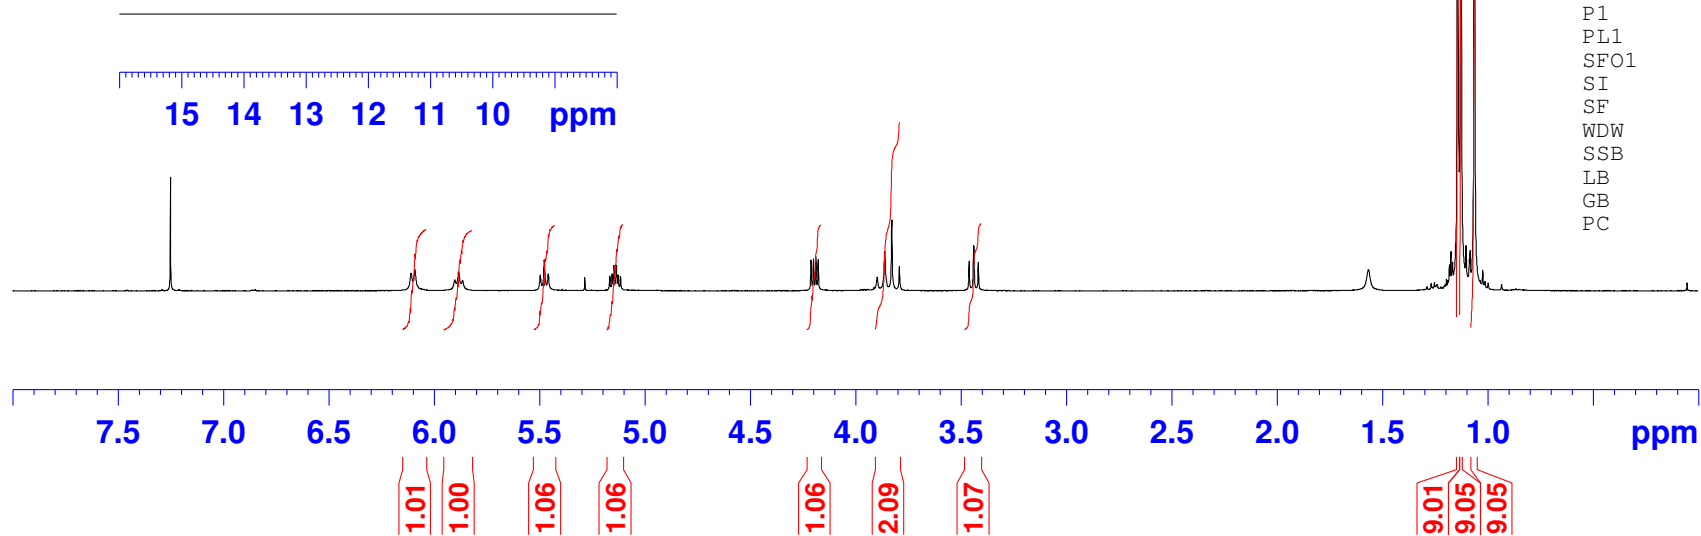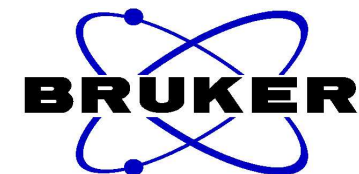

NAME 101008.501  
EXPNO 10  
PROCNO 1  
Date\_ 20101008  
Time 9.04  
INSTRUM spect  
PROBHD 5 mm BBO BB-1H  
PULPROG zg30  
TD 65536  
SOLVENT CDCl3  
NS 32  
DS 2  
SWH 12531.328 Hz  
FIDRES 0.191213 Hz  
AQ 2.6149764 sec  
RG 128  
DW 39.900 usec  
DE 6.00 usec  
TE 300.0 K  
D1 1.00000000 sec

==== CHANNEL f1 =====  
NUC1 1H  
P1 8.60 usec  
PL1 -3.00 dB  
SFO1 500.1340010 MHz  
SI 32768  
SF 500.1300181 MHz  
WDW EM  
SSB 0  
LB 0.30 Hz  
GB 0  
PC 1.00

Erben 13C in CDCl3

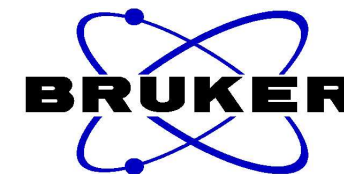

10c

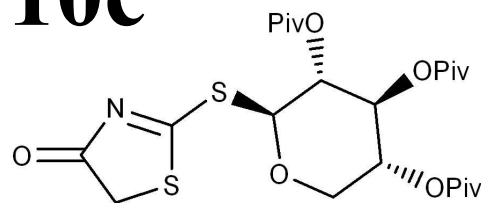

201.32

177.75

177.08

176.91

172.32

83.14

71.90

68.33

67.71

65.63

38.91

38.78

38.74

33.43

27.11

27.06

27.05

```
NAME 101008.501
EXPNO 16
PROCNO 1
Date_ 20101010
Time 23.47
INSTRUM spect
PROBHD 5 mm BBO BB-1H
PULPROG zgpg30
TD 65536
SOLVENT CDCl3
NS 25600
DS 4
SWH 30030.029 Hz
FIDRES 0.458222 Hz
AQ 1.0912410 sec
RG 71.8
DW 16.650 usec
DE 6.00 usec
TE 300.0 K
D1 2.00000000 sec
d11 0.03000000 sec
d12 0.00002000 sec
```

```
===== CHANNEL f1 =====
NUC1 13C
P1 9.00 usec
PL1 4.80 dB
SFO1 125.7703643 MHz
```

```
===== CHANNEL f2 =====
CPDPRG2 waltz16
NUC2 1H
PCPD2 80.00 usec
PL2 -3.00 dB
PL12 17.50 dB
PL13 20.00 dB
SFO2 500.1320005 MHz
SI 32768
SF 125.7577914 MHz
WDW EM
SSB 0
LB 1.00 Hz
GB 0
PC 1.40
```

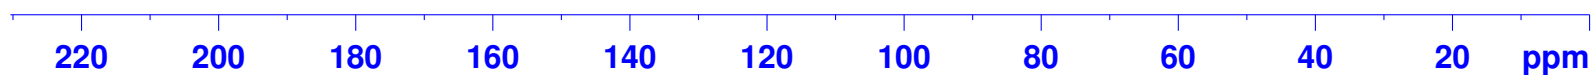

Erben 1H in Aceton-d6

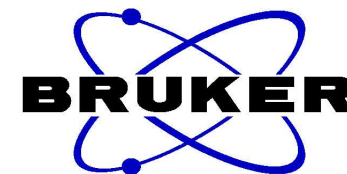

10d

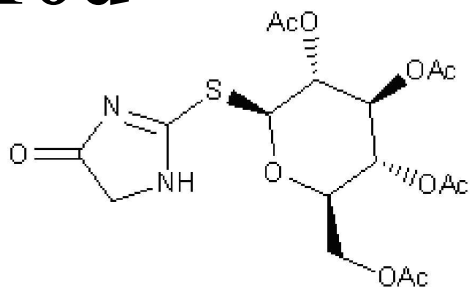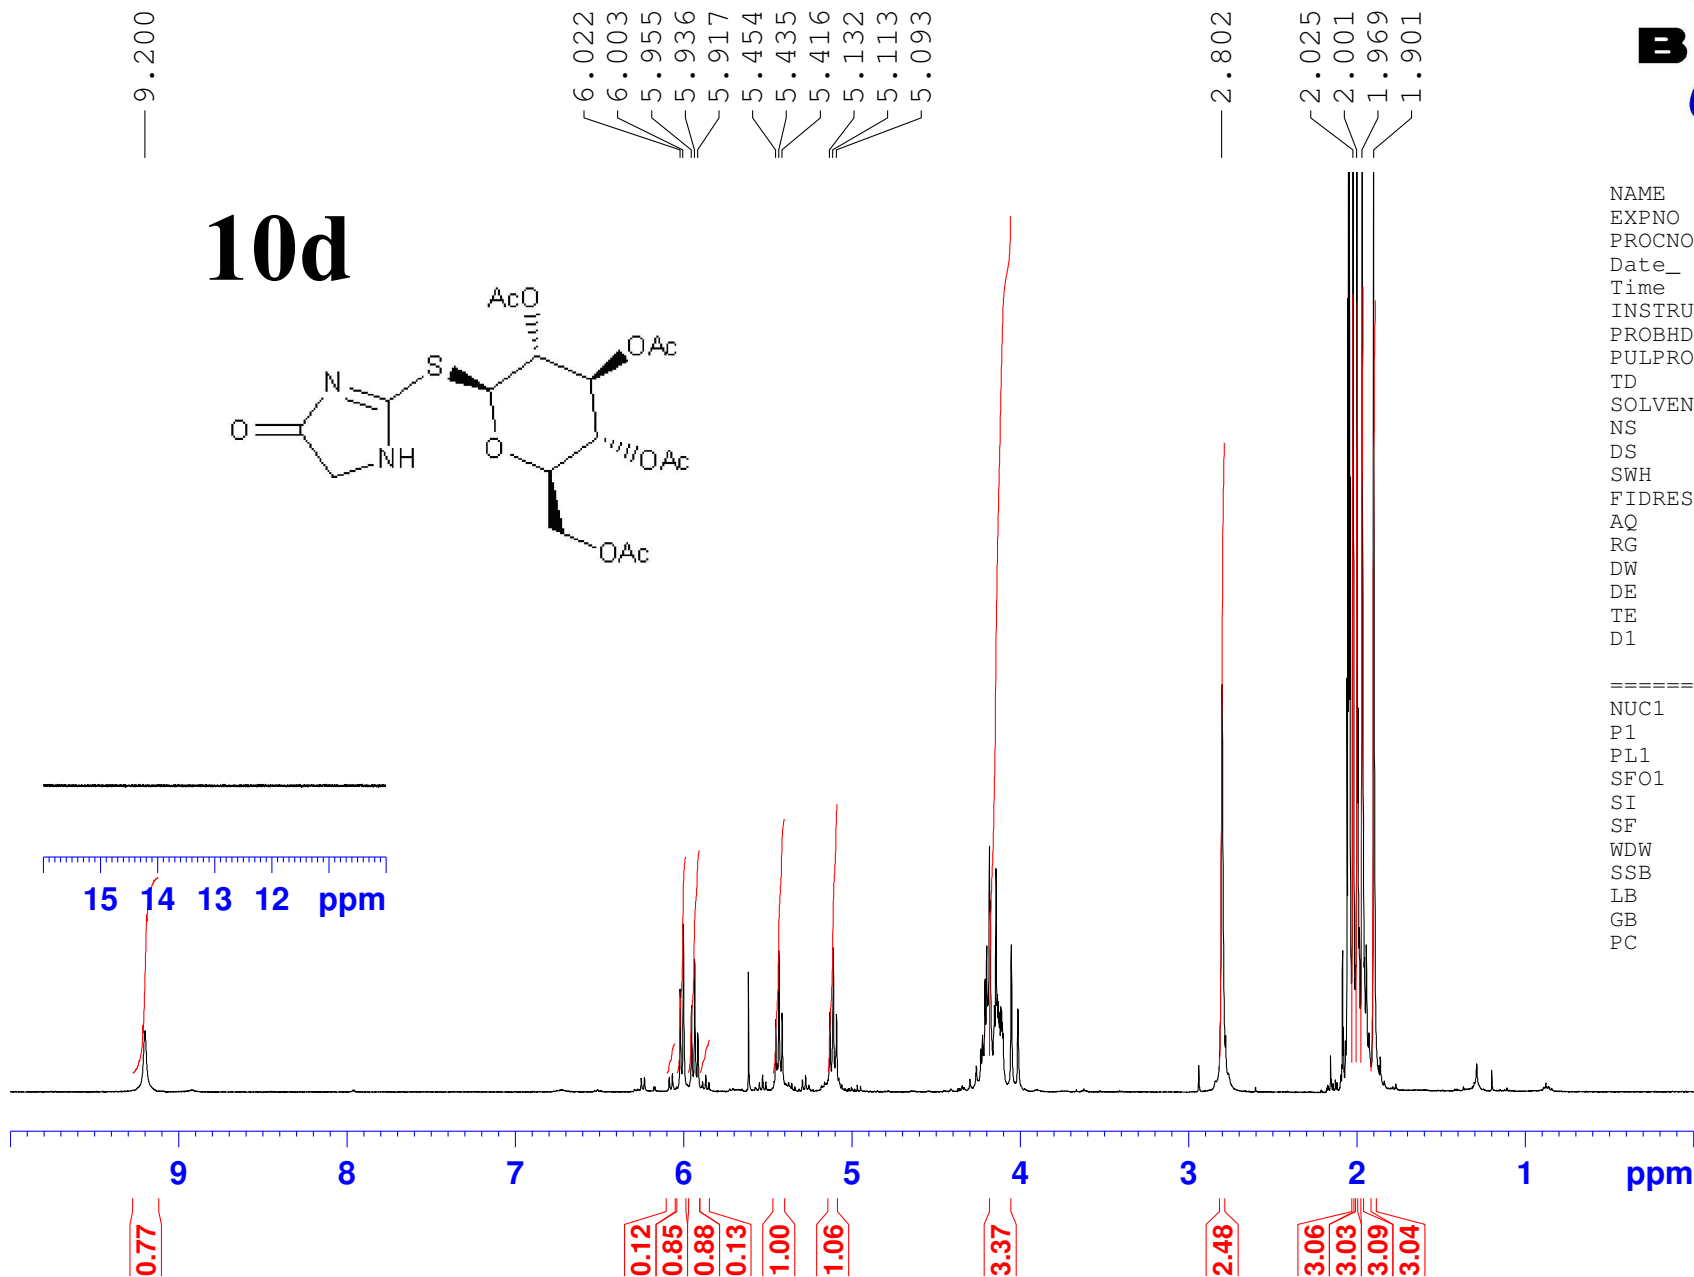

NAME 100923.501  
EXPNO 10  
PROCNO 1  
Date\_ 20100923  
Time 10.53  
INSTRUM spect  
PROBHD 5 mm BBO BB-1H  
PULPROG zg30  
TD 65536  
SOLVENT Acetone  
NS 16  
DS 2  
SWH 12531.328 Hz  
FIDRES 0.191213 Hz  
AQ 2.6149764 sec  
RG 181  
DW 39.900 usec  
DE 6.00 usec  
TE 300.0 K  
D1 1.00000000 sec

===== CHANNEL f1 =====  
NUC1 1H  
P1 8.60 usec  
PL1 -3.00 dB  
SFO1 500.1340010 MHz  
SI 32768  
SF 500.1300097 MHz  
WDW EM  
SSB 0  
LB 0.30 Hz  
GB 0  
PC 1.00

Erben 13C in Aceton-d6

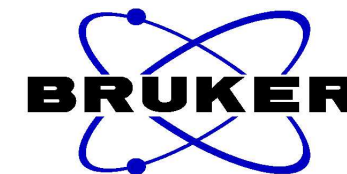

185.46  
172.50  
171.65  
171.22  
171.08  
171.03  
83.01  
75.88  
74.90  
69.81  
69.75  
63.62  
49.45  
21.62  
21.59  
21.52  
21.48

10d

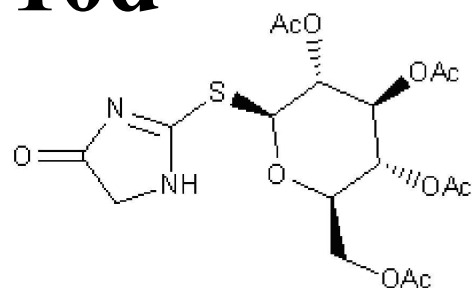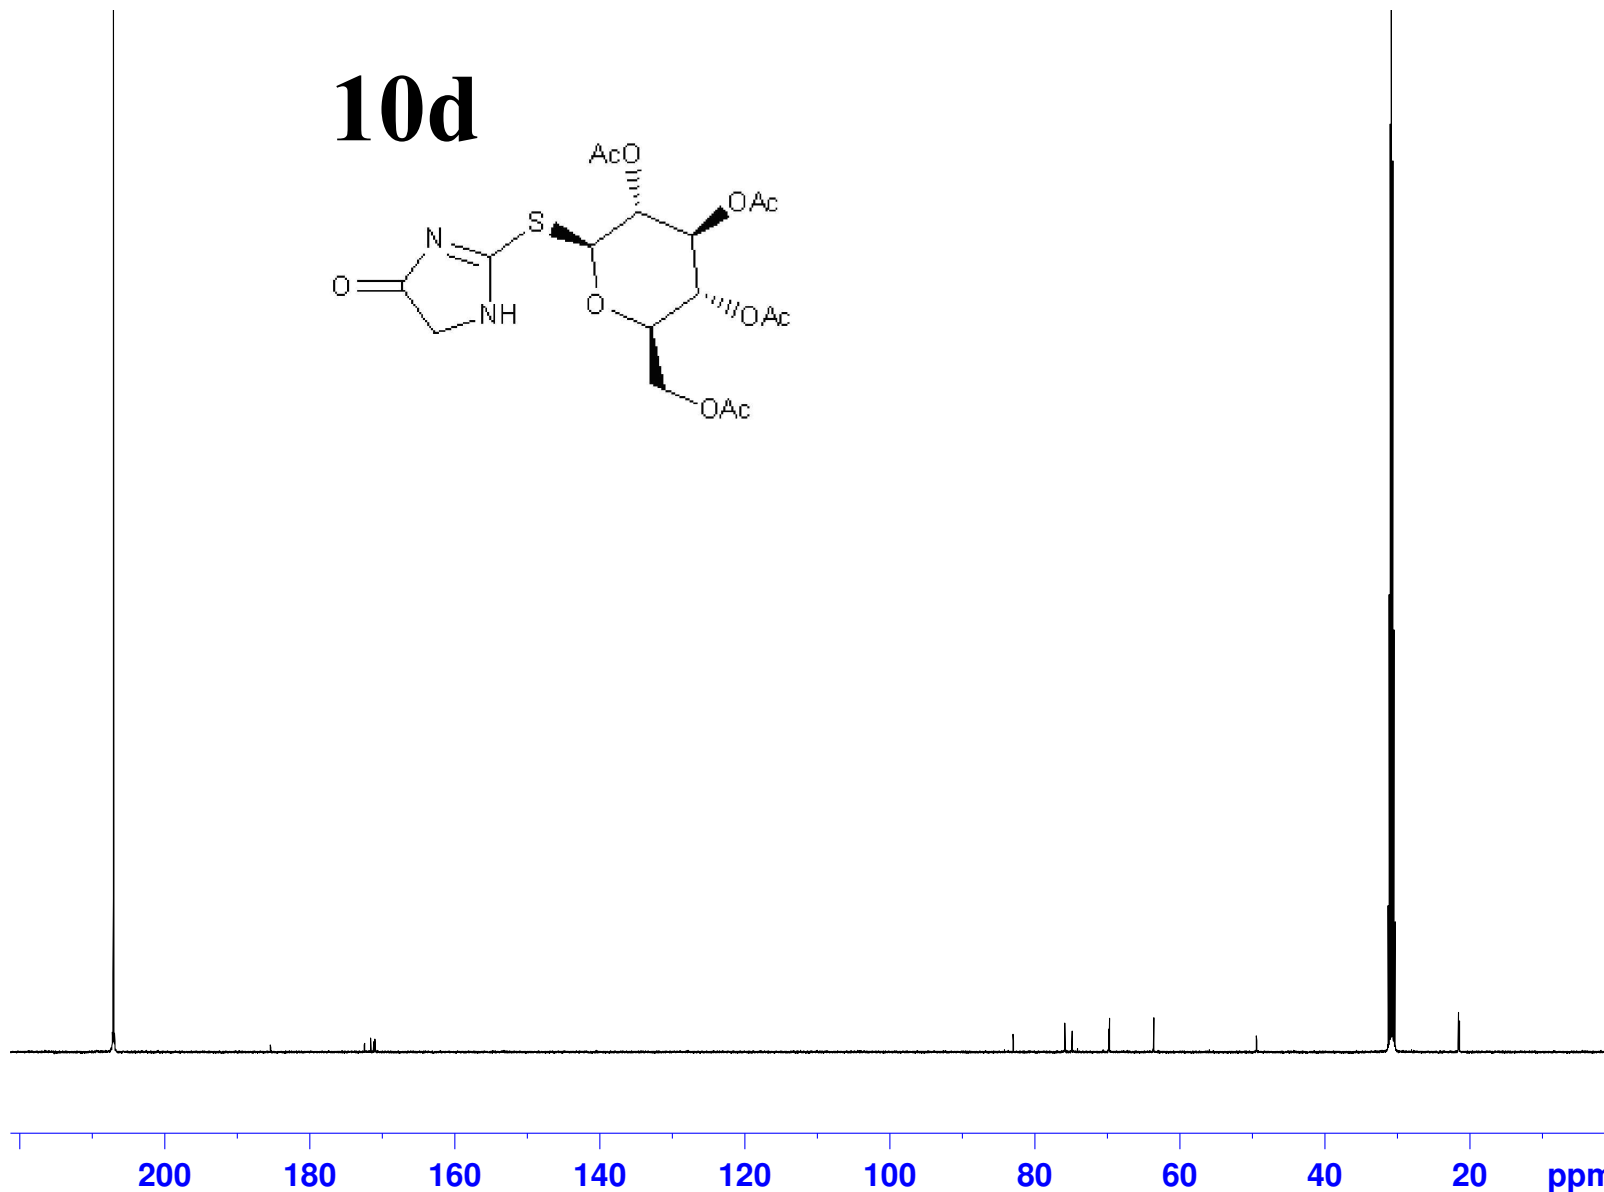

NAME 100923.501  
EXPNO 12  
PROCNO 1  
Date\_ 20100923  
Time 12.44  
INSTRUM spect  
PROBHD 5 mm BBO BB-1H  
PULPROG zgpg30  
TD 65536  
SOLVENT Acetone  
NS 2048  
DS 4  
SWH 30030.029 Hz  
FIDRES 0.458222 Hz  
AQ 1.0912410 sec  
RG 80.6  
DW 16.650 use  
DE 6.00 use  
TE 300.0 K  
D1 2.00000000 sec  
d11 0.03000000 sec  
d12 0.00002000 sec

==== CHANNEL f1 =====  
NUC1 13C  
P1 9.00 use  
PL1 4.80 dB  
SFO1 125.7703643 MHz

==== CHANNEL f2 =====  
CPDPRG2 waltz16  
NUC2 1H  
PCPD2 80.00 use  
PL2 -3.00 dB  
PL12 17.50 dB  
PL13 20.00 dB  
SFO2 500.1320005 MHz  
SI 32768  
SF 125.7575504 MHz  
WDW EM  
SSB 0  
LB 1.00 Hz  
GB 0  
PC 1.40

Erben 1H in DMSO, 300 K

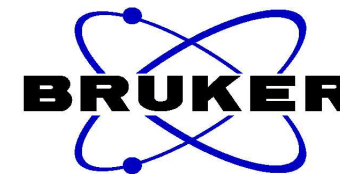

11.300  
11.270  
8.767  
8.751  
8.730  
8.714  
7.465  
7.450  
7.434  
7.141  
7.125  
7.110  
7.095  
7.079  
6.979  
6.964  
6.597  
6.579  
6.430  
6.411  
6.392  
6.247  
6.228  
5.944  
5.926  
5.907  
5.659  
5.639  
5.620  
5.591  
5.572  
5.553  
5.094  
5.074  
5.054  
5.041  
5.021  
5.002  
4.410  
4.390  
4.158  
2.048  
2.024  
1.994  
1.870

12a

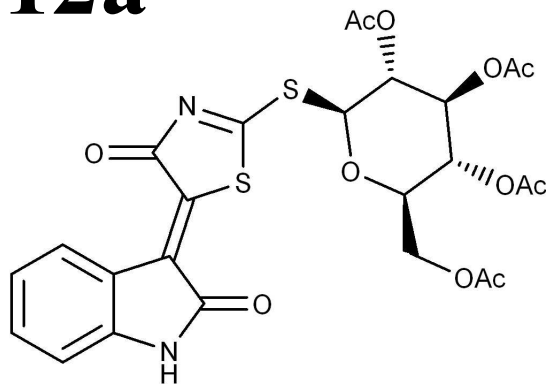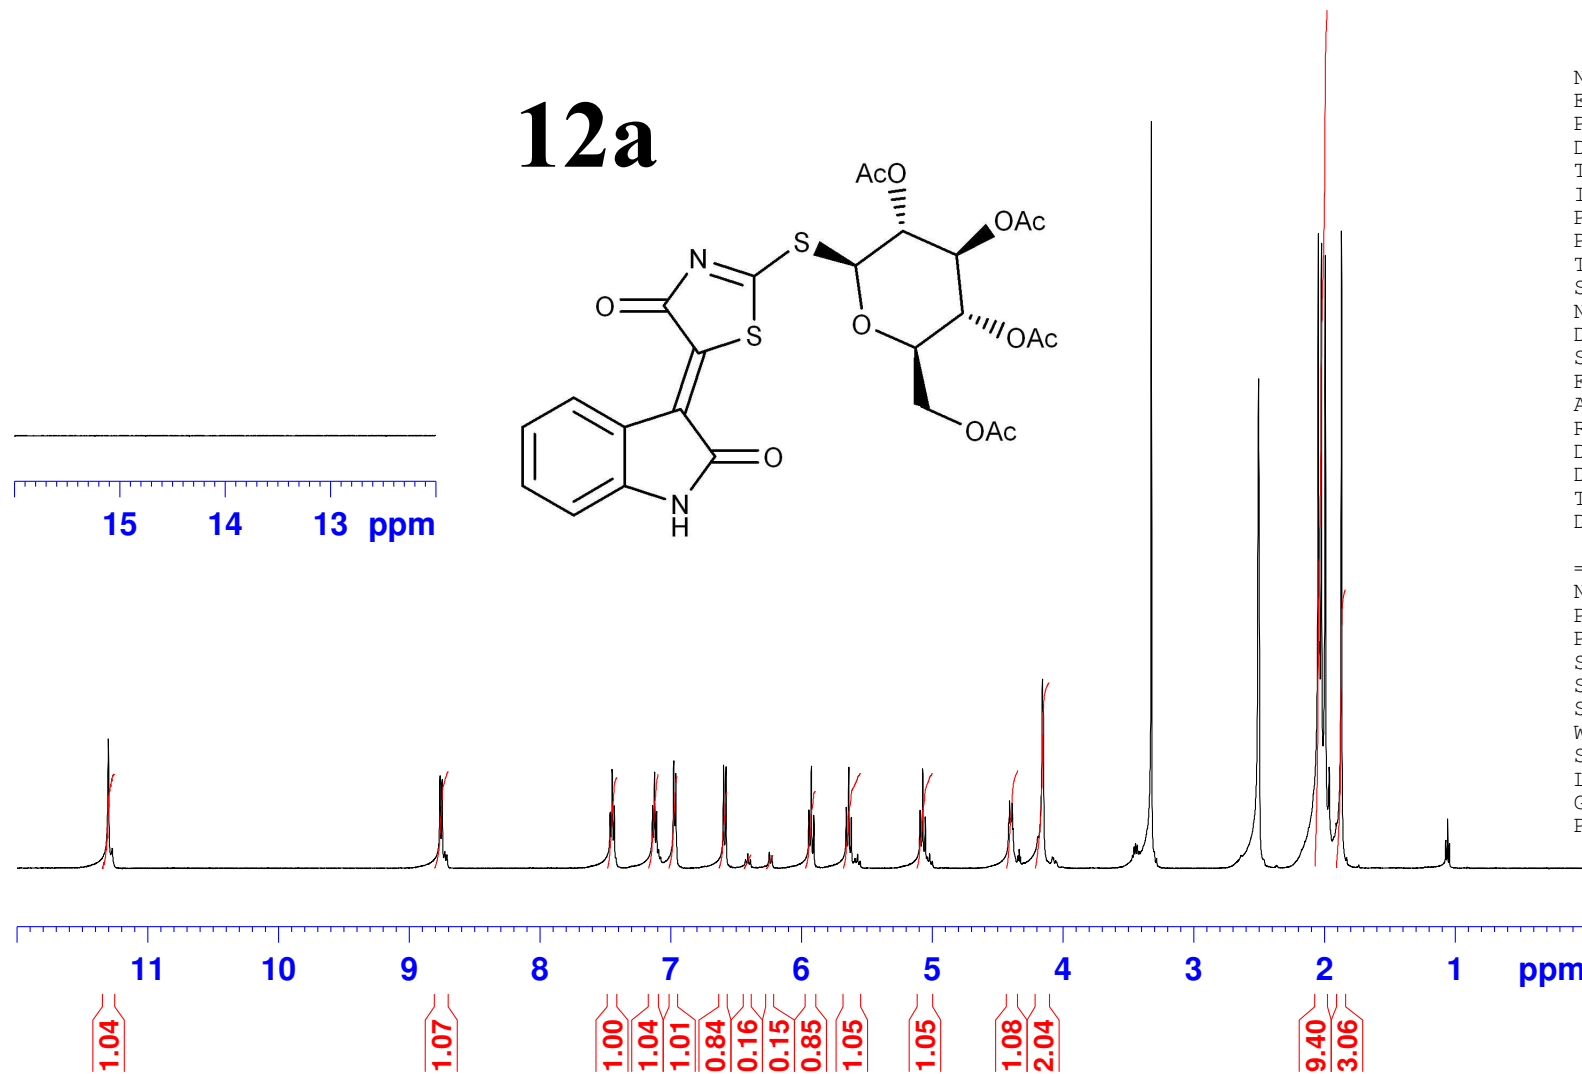

NAME 100527.503  
EXPNO 20  
PROCNO 1  
Date\_ 20100528  
Time 14.31  
INSTRUM spect  
PROBHD 5 mm BBO BB-1H  
PULPROG zg30  
TD 65536  
SOLVENT DMSO  
NS 16  
DS 2  
SWH 10330.578 Hz  
FIDRES 0.157632 Hz  
AQ 3.1720407 sec  
RG 90.5  
DW 48.400 usec  
DE 6.00 usec  
TE 300.0 K  
D1 1.00000000 sec

==== CHANNEL f1 =====  
NUC1 1H  
P1 8.60 usec  
PL1 -3.00 dB  
SFO1 500.1330885 MHz  
SI 32768  
SF 500.1300024 MHz  
WDW EM  
SSB 0  
LB 0.30 Hz  
GB 0  
PC 1.00

1.04

1.07

1.00

1.04

1.01

0.84

0.16

0.15

0.85

1.05

1.05

1.08

2.04

9.40

3.06

Erben 13C in DMSO, 300 K

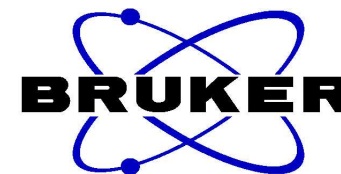

198.54  
170.11  
169.90  
169.63  
169.57  
168.10  
168.05  
165.66  
145.25  
133.77  
133.54  
128.39  
128.27  
128.10  
126.45  
122.62  
122.42  
119.82  
111.07

81.46  
80.92  
73.21  
72.73  
72.05  
67.87  
67.53  
67.28  
67.22  
61.58

20.70  
20.55  
20.45  
20.24

12a

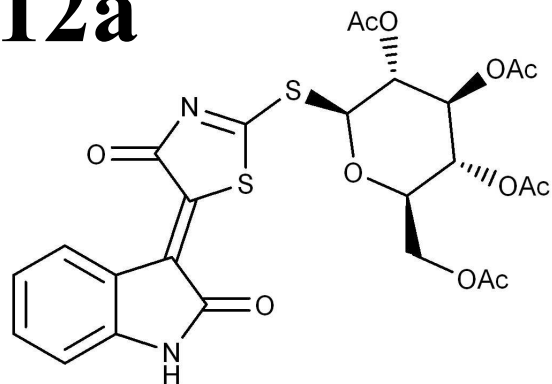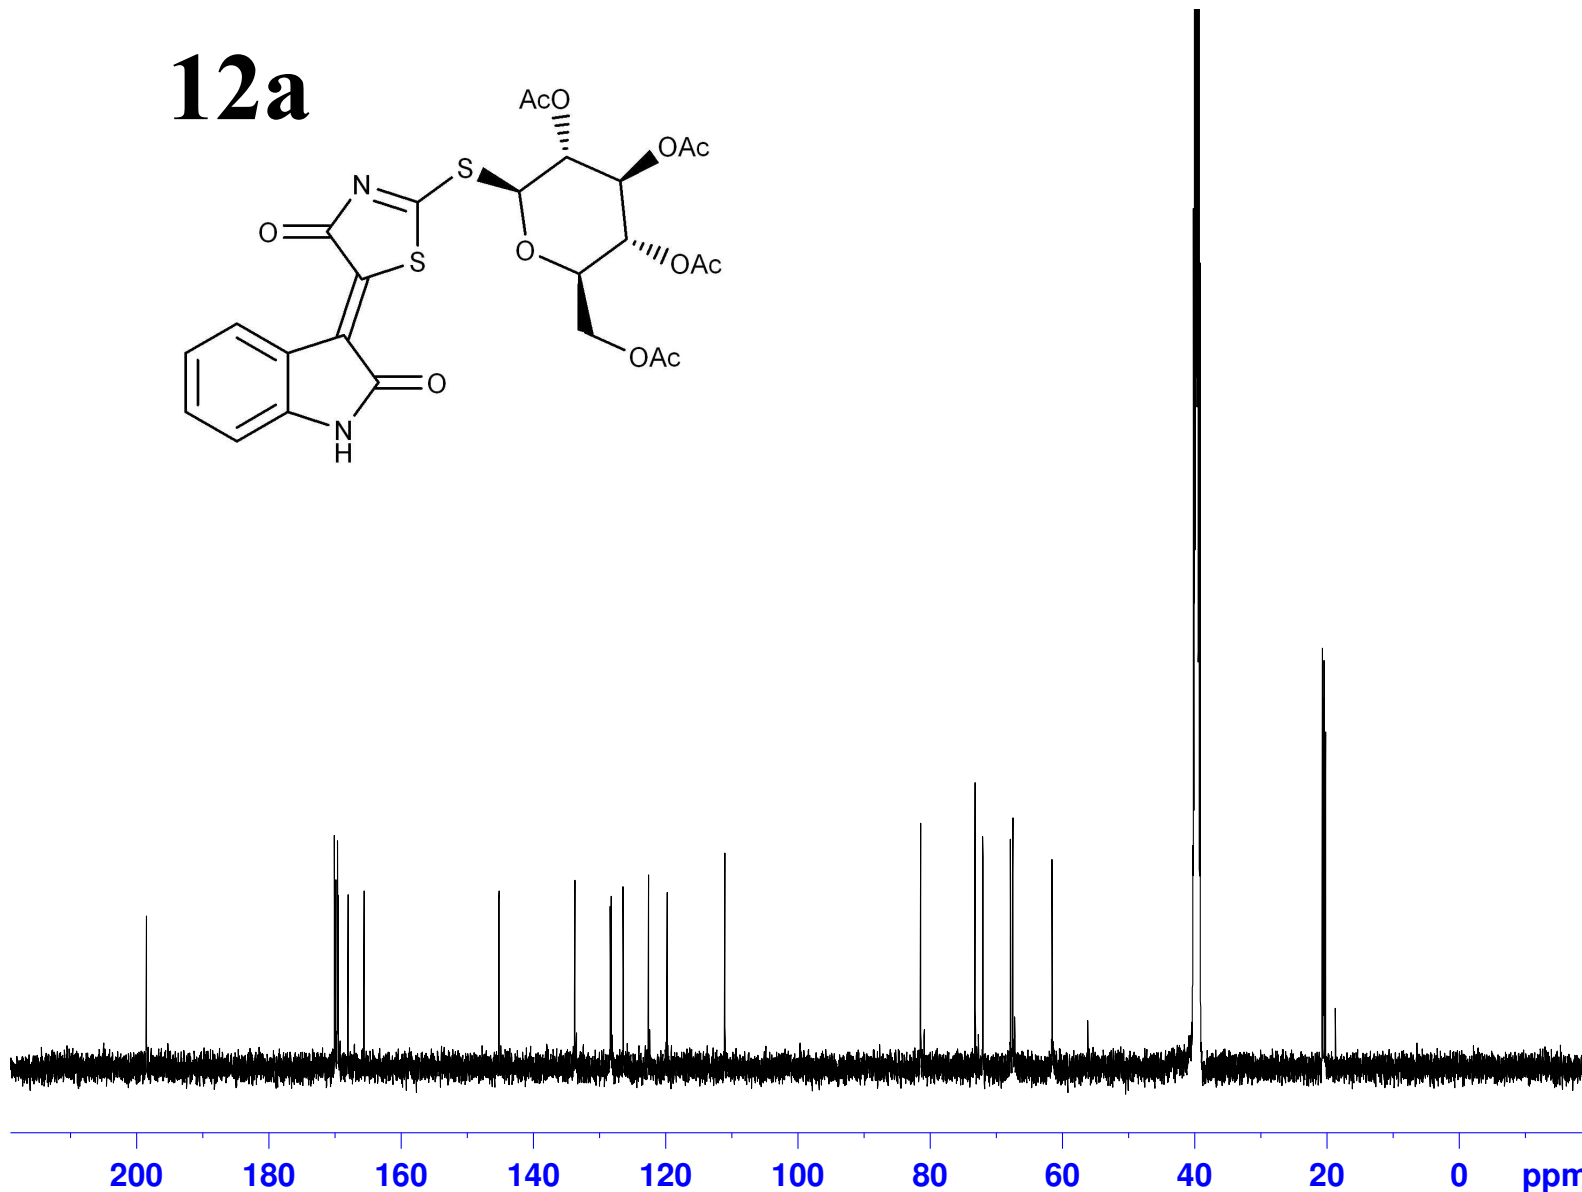

NAME 100527.503  
EXPNO 22  
PROCNO 1  
Date\_ 20100528  
Time 15.45  
INSTRUM spect  
PROBHD 5 mm BBO BB-1H  
PULPROG zgpg30  
TD 65536  
SOLVENT DMSO  
NS 1024  
DS 4  
SWH 30030.029 Hz  
FIDRES 0.458222 Hz  
AQ 1.0912410 sec  
RG 287.4  
DW 16.650 usec  
DE 6.00 usec  
TE 300.0 K  
D1 2.00000000 sec  
d11 0.03000000 sec  
d12 0.00002000 sec

==== CHANNEL f1 =====  
NUC1 13C  
P1 9.00 usec  
PL1 4.80 dB  
SFO1 125.7703643 MHz

==== CHANNEL f2 =====  
CPDPRG2 waltz16  
NUC2 1H  
PCPD2 80.00 usec  
PL2 -3.00 dB  
PL12 17.50 dB  
PL13 20.00 dB  
SFO2 500.1320005 MHz  
SI 32768  
SF 125.7578272 MHz  
WDW EM  
SSB 0  
LB 1.00 Hz  
GB 0  
PC 1.40

Erben 1H CDC13

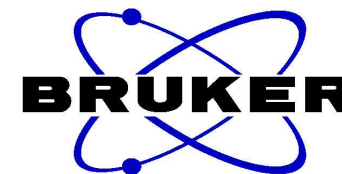

8.867  
8.836  
8.521  
7.333  
7.303  
7.271  
7.118  
7.086  
7.041  
7.010  
6.979  
6.937  
6.864  
6.833  
6.592  
6.556  
6.520  
6.417  
6.380  
6.229  
6.192  
6.155  
5.952  
5.914  
5.578  
5.541  
5.503  
5.452  
5.413  
5.374  
4.402  
4.353  
4.072  
4.056  
4.022  
4.006  
3.964  
3.926

**12b**

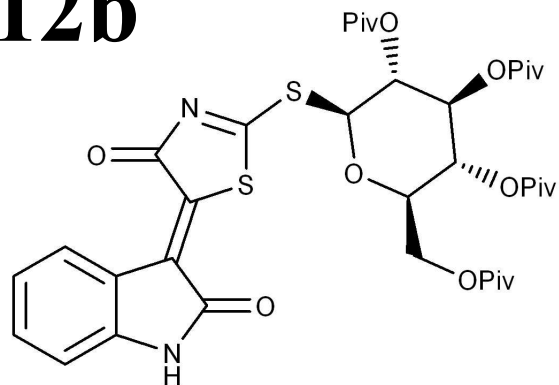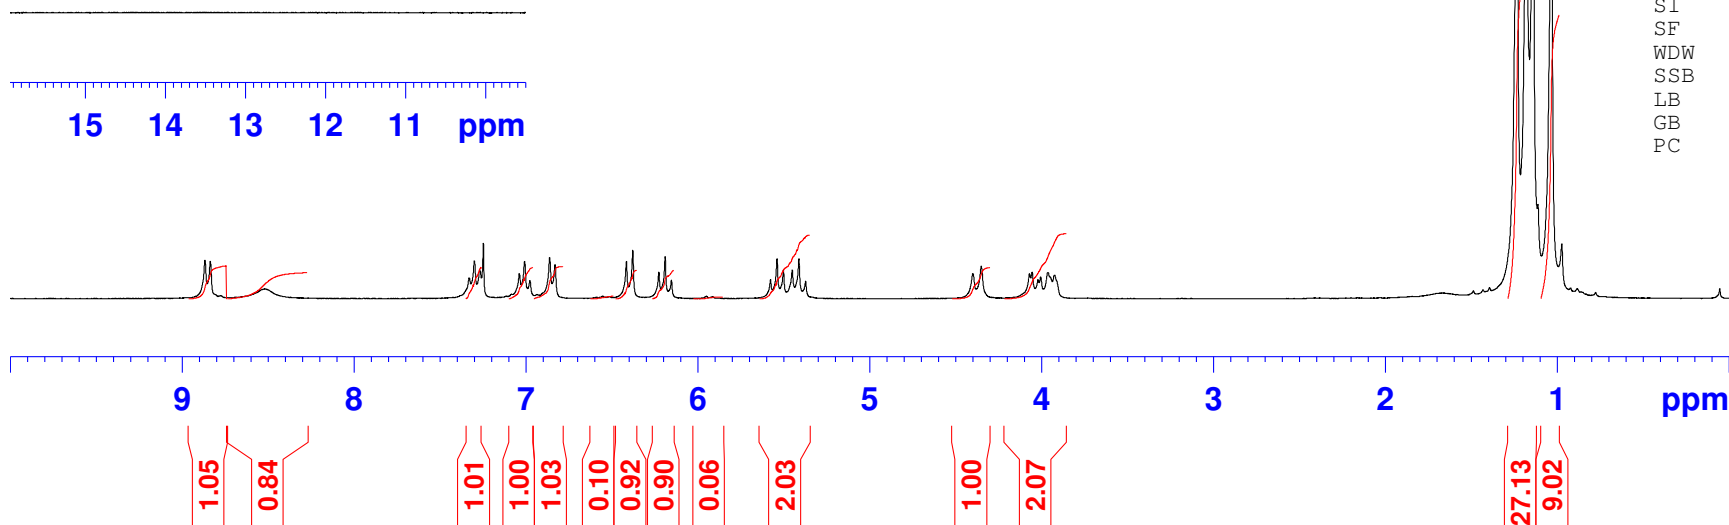

1.235  
1.179  
1.141  
1.034

NAME 100630.204  
EXPNO 10  
PROCNO 1  
Date\_ 20100630  
Time 10.52  
INSTRUM spect  
PROBHD 5 mm PABBO BB-  
PULPROG zg30  
TD 65536  
SOLVENT CDC13  
NS 16  
DS 2  
SWH 5165.289 Hz  
FIDRES 0.078816 Hz  
AQ 6.3439350 sec  
RG 512  
DW 96.800 use  
DE 10.00 use  
TE 298.1 K  
D1 1.00000000 sec  
TD0 1

===== CHANNEL f1 =====  
NUC1 1H  
P1 10.00 use  
PL1 -2.50 dB  
SFO1 250.1315447 MHz  
SI 32768  
SF 250.130026 MHz  
WDW EM  
SSB 0  
LB 0.30 Hz  
GB 0  
PC 1.00

Erben 13C CDC13

197.72

178.13

177.87

177.05

176.29

168.09

165.35

143.33

132.91

129.50

129.31

125.94

123.19

120.16

110.34

82.00

75.25

72.47

67.97

66.95

61.06

38.93

27.17

27.08

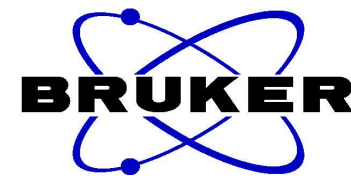

NAME 100630.211  
EXPNO 10  
PROCNO 1  
Date\_ 20100630  
Time 17.37  
INSTRUM spect  
PROBHD 5 mm PABBO BB-  
PULPROG zgpg30  
TD 65536  
SOLVENT CDC13  
NS 1024  
DS 4  
SWH 15000.000 Hz  
FIDRES 0.228882 Hz  
AQ 2.1845834 sec  
RG 2050  
DW 33.333 usec  
DE 10.00 usec  
TE 298.7 K  
D1 2.0000000 sec  
d11 0.0300000 sec  
DELTA 1.89999998 sec  
TD0 1

==== CHANNEL f1 =====  
NUC1 13C  
P1 10.00 usec  
PL1 -1.00 dB  
SFO1 62.9015280 MHz

==== CHANNEL f2 =====  
CPDPRG2 waltz16  
NUC2 1H  
PCPD2 70.00 usec  
PL12 15.00 dB  
PL13 15.00 dB  
PL2 -2.50 dB  
SFO2 250.1310005 MHz  
SI 32768  
SF 62.8952394 MHz  
WDW EM  
SSB 0  
LB 1.00 Hz  
GB 0  
PC 1.40

12b

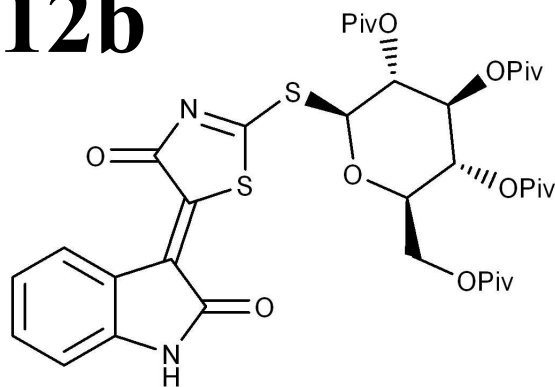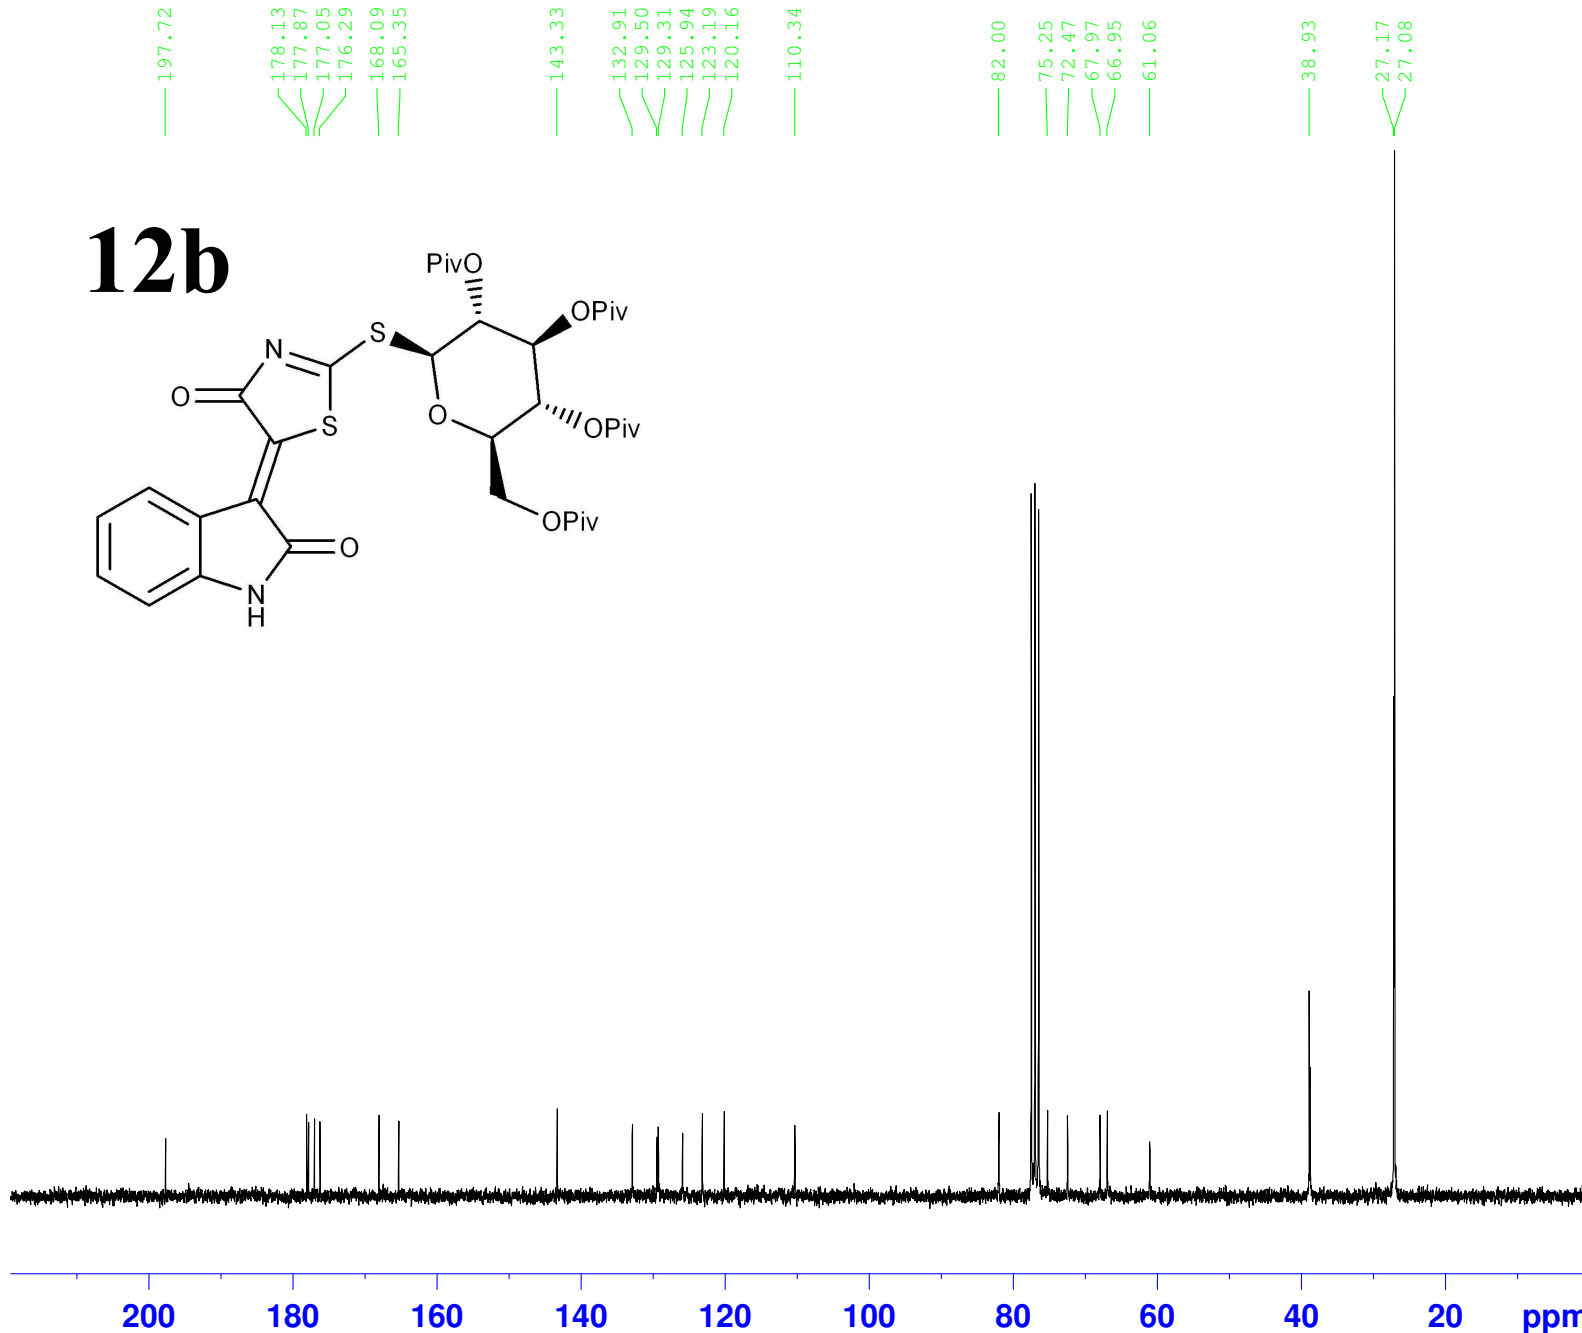



Erben 1H CDC13

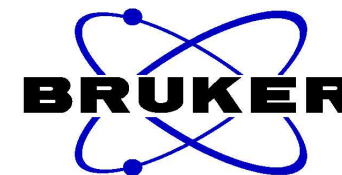

12c

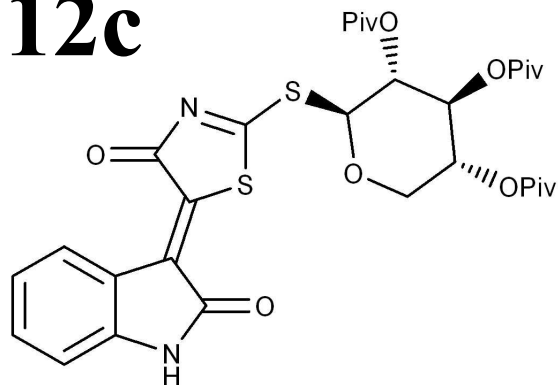

8.920  
8.905  
8.880  
8.864  
8.473  
8.431  
7.389  
7.370  
7.350  
7.330  
7.315  
7.300  
7.050  
7.035  
7.020  
6.868  
6.852  
6.342  
6.323  
6.148  
6.129  
6.111  
5.564  
5.545  
5.526  
4.285  
4.274  
4.262  
4.251  
3.540  
3.519  
3.497

1.167  
1.152  
1.036

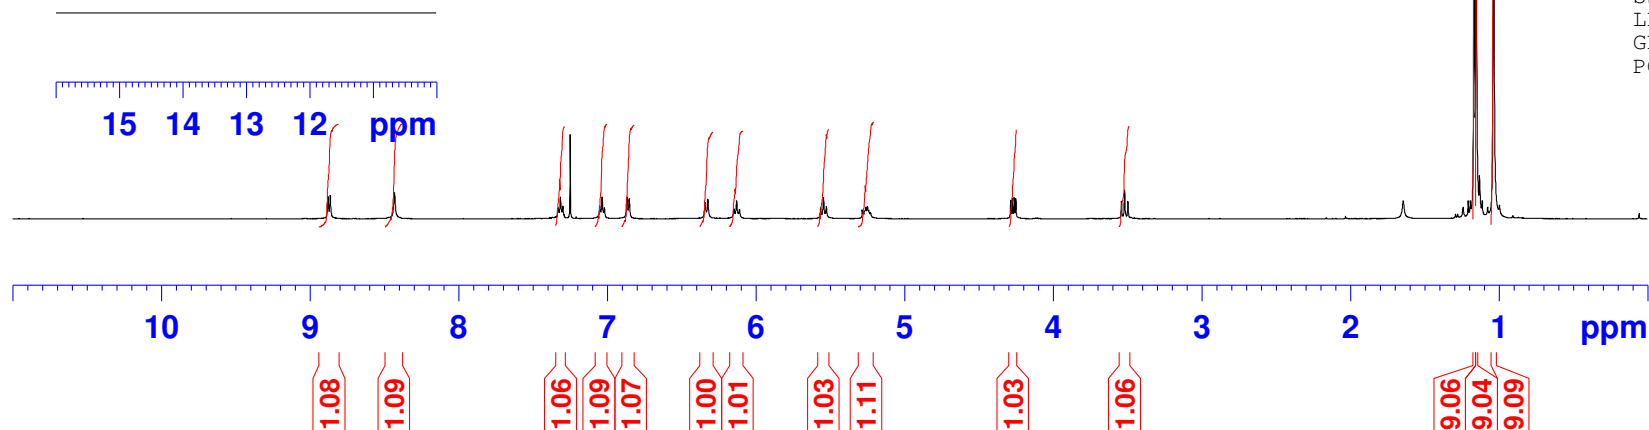

```
NAME 101005.502
EXPNO 10
PROCNO 1
Date_ 20101005
Time 15.20
INSTRUM spect
PROBHD 5 mm BBO BB-1H
PULPROG zg30
TD 65536
SOLVENT CDCl3
NS 32
DS 2
SWH 15015.015 Hz
FIDRES 0.229111 Hz
AQ 2.1824322 sec
RG 101.6
DW 33.300 usec
DE 6.00 usec
TE 300.0 K
D1 1.00000000 sec

===== CHANNEL f1 =====
NUC1 1H
P1 8.60 usec
PL1 -3.00 dB
SFO1 500.1350013 MHz
SI 32768
SF 500.1300181 MHz
WDW EM
SSB 0
LB 0.30 Hz
GB 0
PC 1.00
```

Erben 13C CDCl3

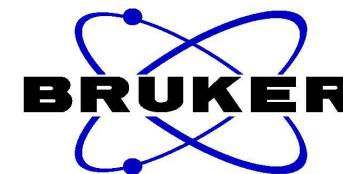

# 12c

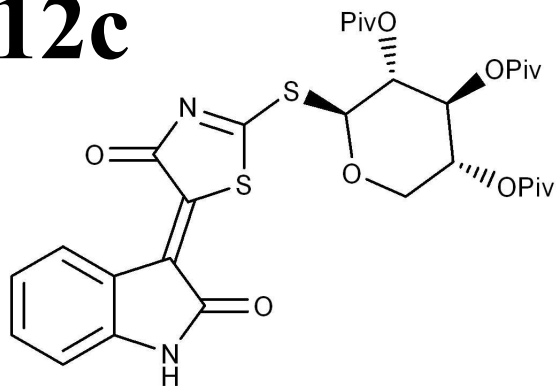

197.63  
177.90  
177.15  
176.98  
168.18  
165.74  
143.18  
133.02  
129.59  
129.49  
125.96  
123.34  
120.24  
110.34  
82.78  
72.13  
68.41  
67.88  
65.81  
38.93  
38.82  
38.78  
27.15  
27.07

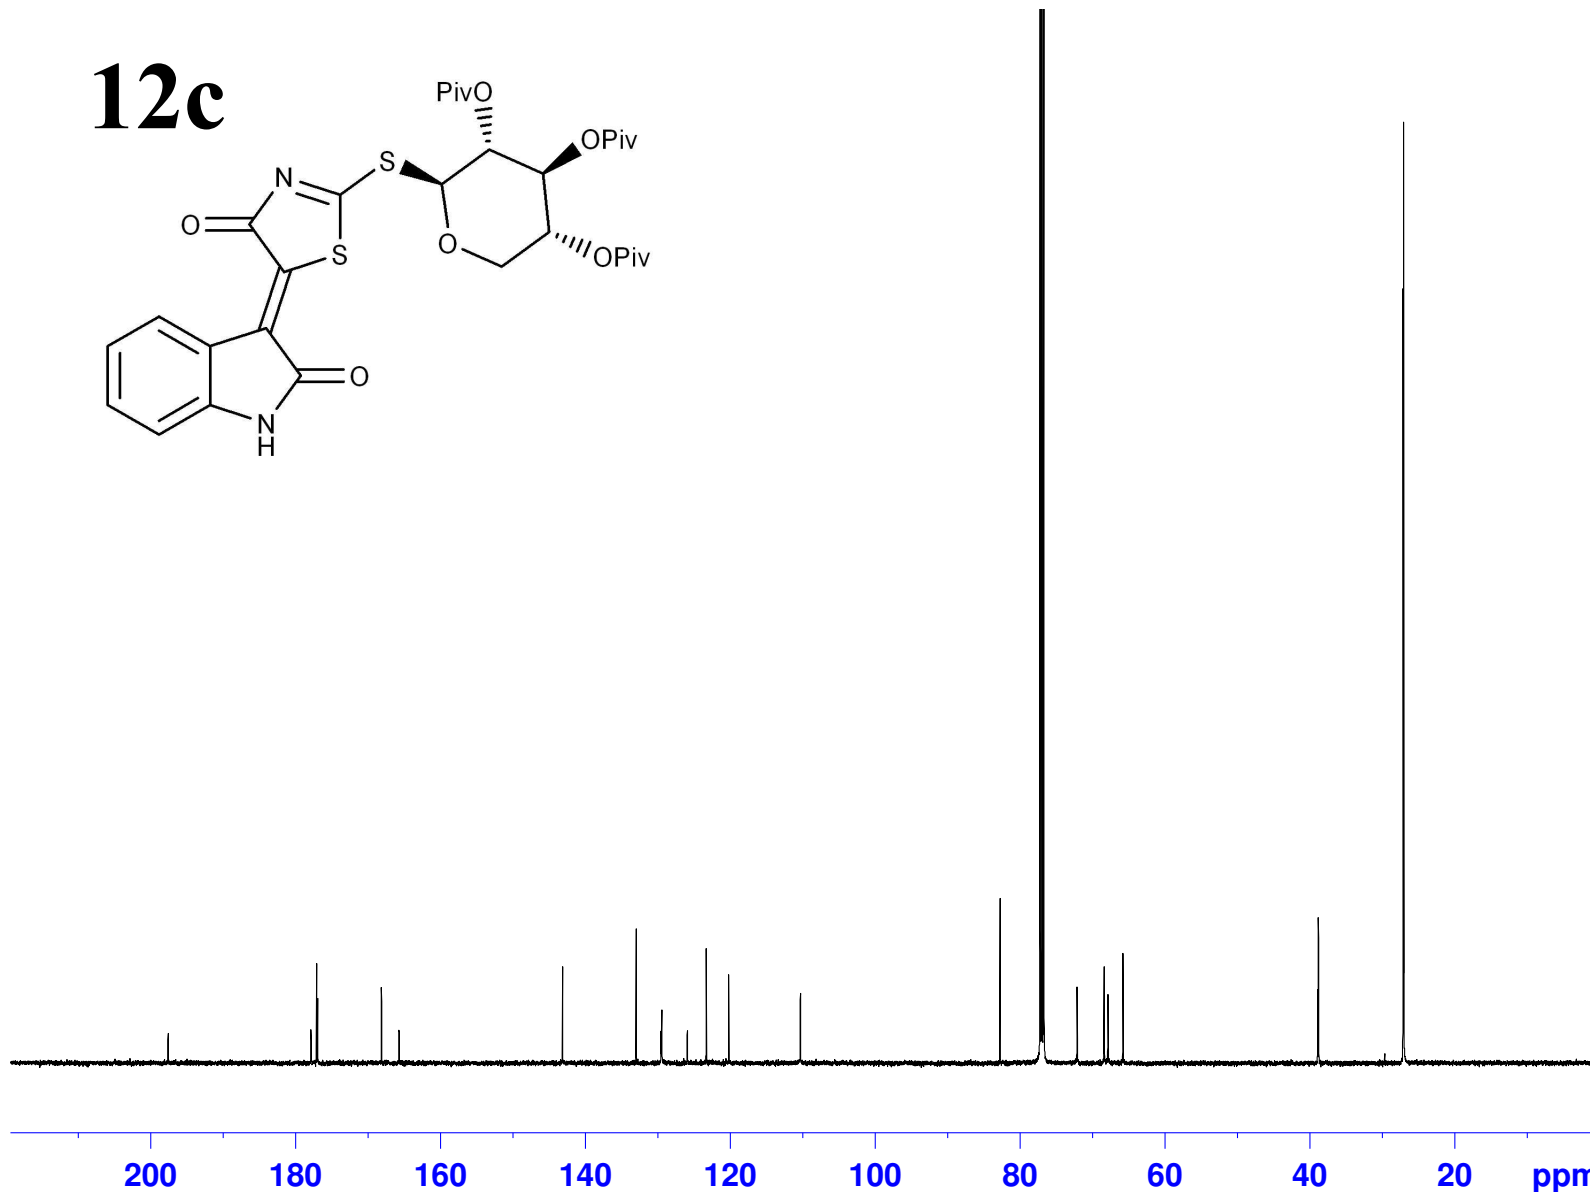

NAME 101005.502  
EXPNO 18  
PROCNO 1  
Date\_ 20101006  
Time 12.25  
INSTRUM spect  
PROBHD 5 mm BBO BB-1H  
PULPROG zgpg30  
TD 65536  
SOLVENT CDCl3  
NS 5120  
DS 4  
SWH 30030.029 Hz  
FIDRES 0.458222 Hz  
AQ 1.0912410 sec  
RG 143.7  
DW 16.650 usec  
DE 6.00 usec  
TE 300.0 K  
D1 2.00000000 sec  
d11 0.03000000 sec  
d12 0.00002000 sec

==== CHANNEL f1 =====  
NUC1 13C  
P1 9.00 usec  
PL1 4.80 dB  
SFO1 125.7703643 MHz

==== CHANNEL f2 =====  
CPDPRG2 waltz16  
NUC2 1H  
PCPD2 80.00 usec  
PL2 -3.00 dB  
PL12 17.50 dB  
PL13 20.00 dB  
SFO2 500.1320005 MHz  
SI 32768  
SF 125.7577919 MHz  
WDW EM  
SSB 0  
LB 1.00 Hz  
GB 0  
PC 1.40

Erben 1H CDC13

9.091  
9.065  
8.944  
8.920  
7.195  
7.169  
7.144  
6.855  
6.828  
6.599  
6.569  
6.538  
6.420  
6.389  
6.235  
6.204  
6.173  
5.972  
5.941  
5.565  
5.533  
5.502  
5.449  
5.417  
5.384  
4.358  
4.319  
4.254  
4.212  
4.087  
4.073  
4.045  
4.031  
1.242  
1.226  
1.182  
1.164  
1.140  
1.120  
1.023  
1.010

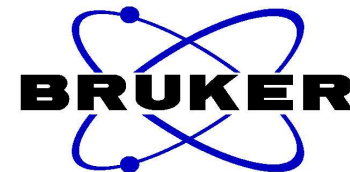

# 12d

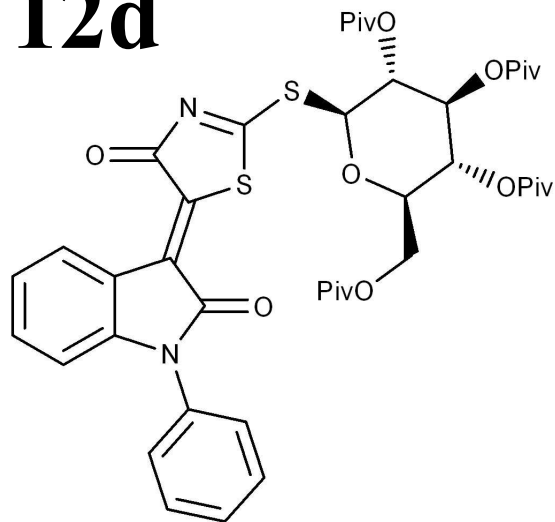

15 14 13 12 ppm

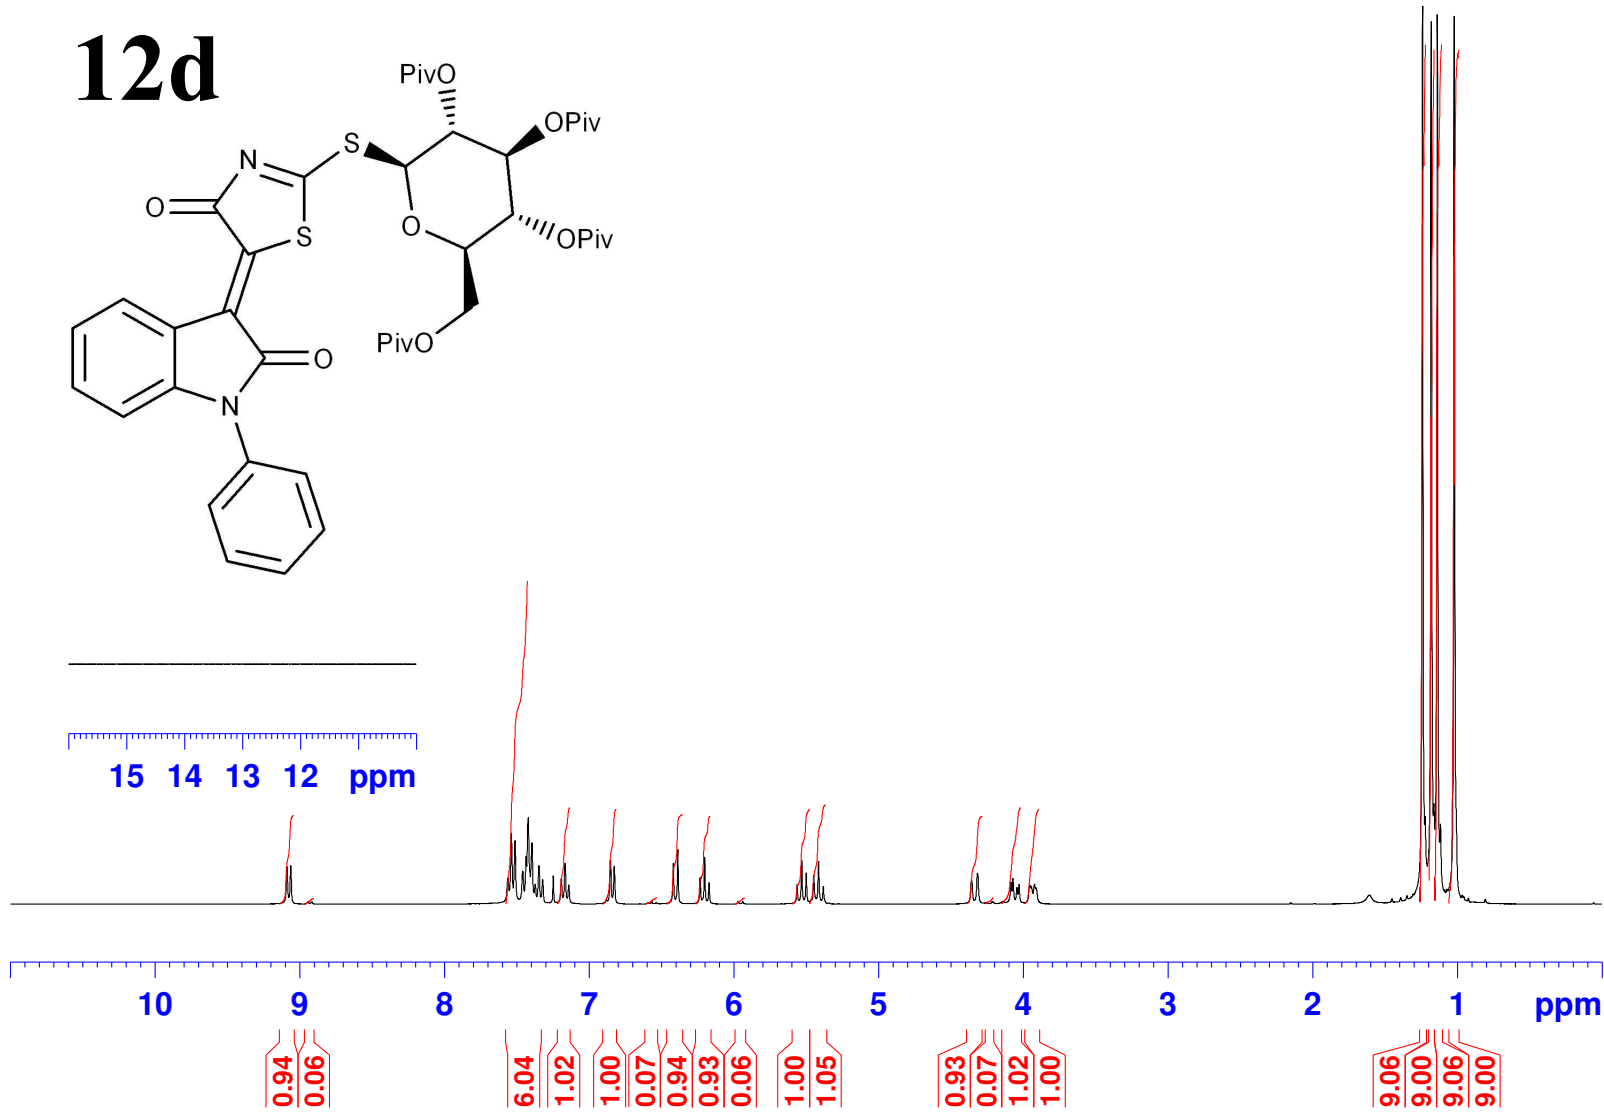

NAME 110628.u330  
EXPNO 12  
PROCNO 1  
Date\_ 20110628  
Time 23.57  
INSTRUM spect  
PROBHD 5 mm PABBO BB-  
PULPROG zg30  
TD 65536  
SOLVENT CDC13  
NS 16  
DS 2  
SWH 6188.119 Hz  
FIDRES 0.094423 Hz  
AQ 5.2953587 sec  
RG 71.8  
DW 80.800 usec  
DE 10.00 usec  
TE 298.2 K  
D1 1.00000000 sec  
TD0 1

===== CHANNEL f1 =====  
NUC1 1H  
P1 10.00 usec  
PL1 0.00 dB  
PL1W 11.25325108 W  
SFO1 300.1318534 MHz  
SI 32768  
SF 300.1300128 MHz  
WDW EM  
SSB 0  
LB 0.30 Hz  
GB 0  
PC 1.00

Erben 13C CDCl3



197.67  
 177.94  
 177.30  
 177.01  
 176.28  
 166.58  
 165.36  
 145.68  
 133.36  
 132.77  
 130.63  
 129.78  
 129.43  
 128.65  
 126.49  
 125.52  
 123.78  
 119.91  
 109.81  
 82.11  
 75.26  
 72.48  
 67.74  
 66.97  
 61.06  
 38.91  
 38.85  
 38.81  
 38.77  
 27.16  
 27.07

# 12d

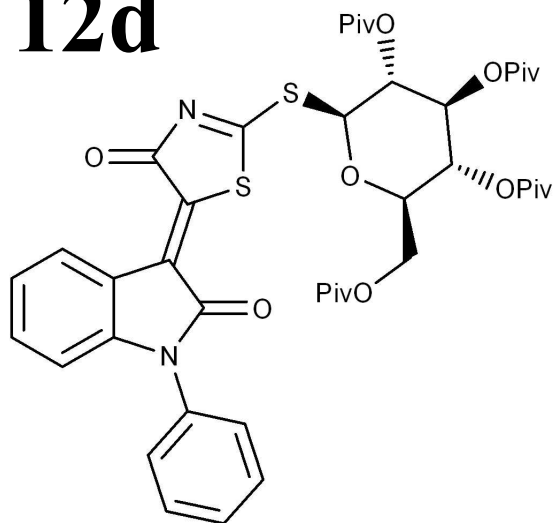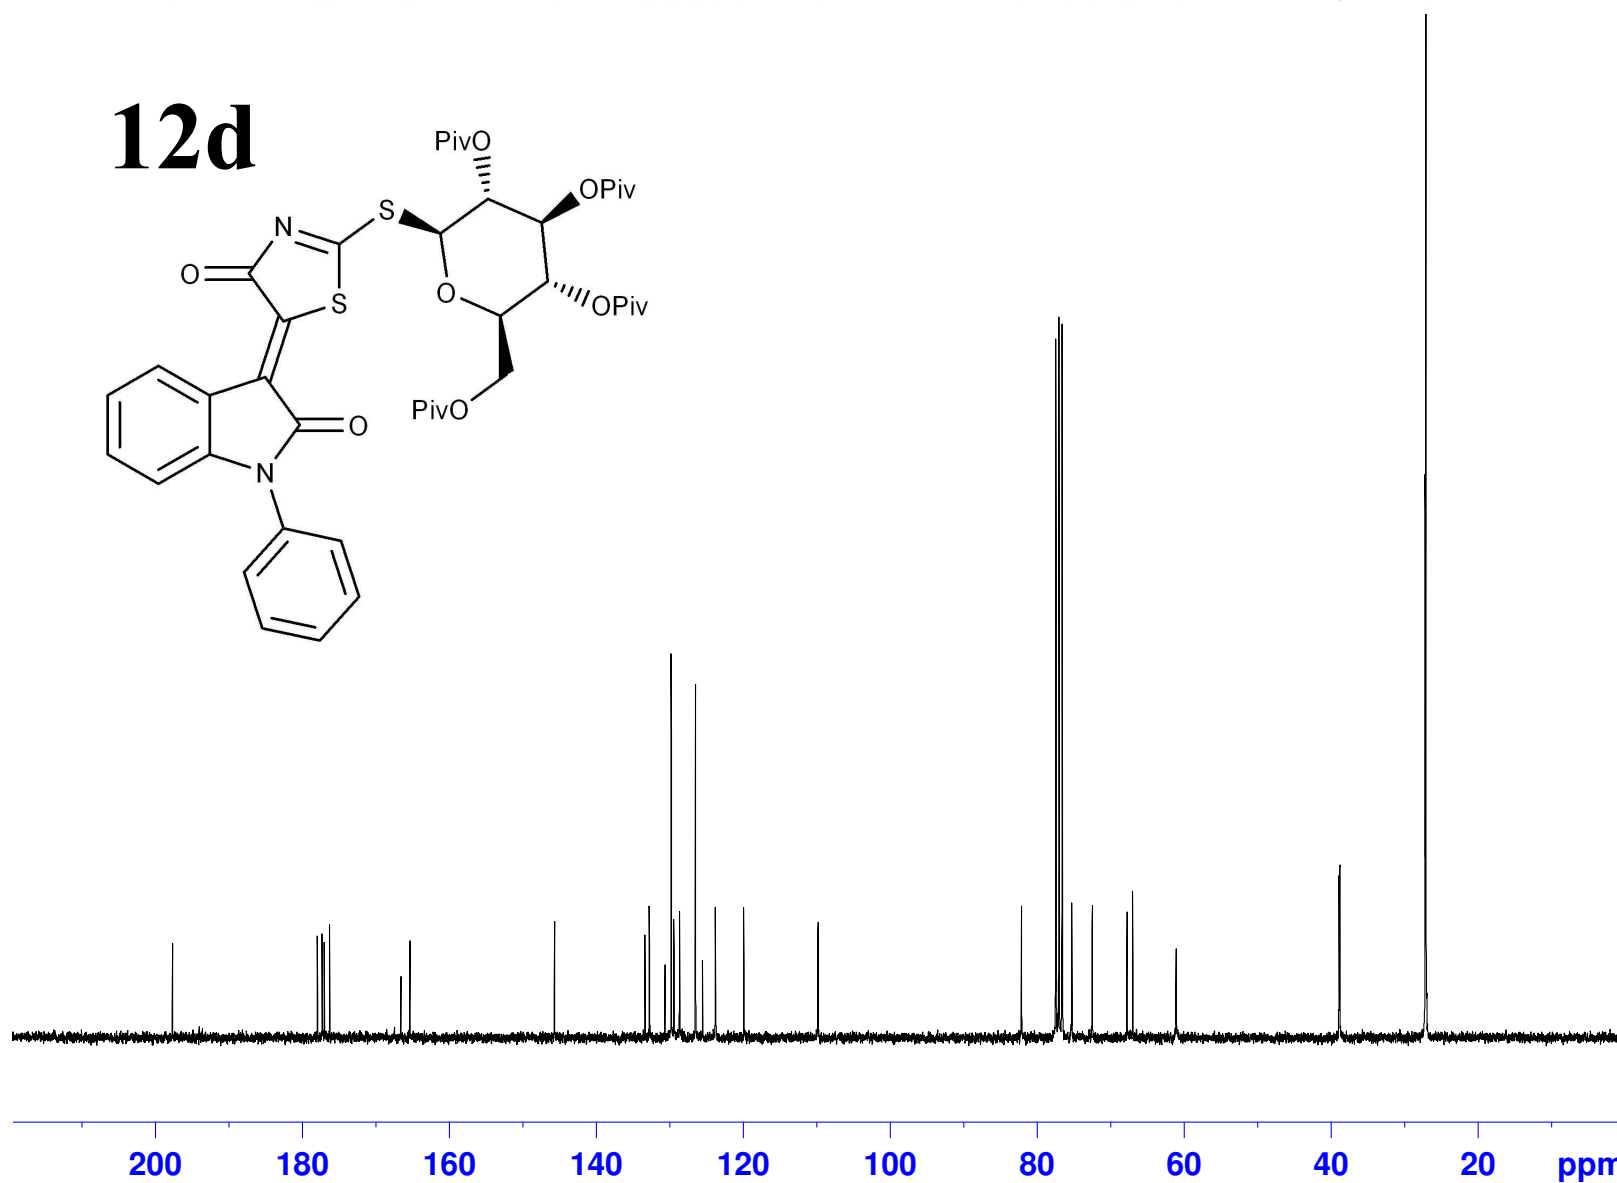

```

NAME      110628.u330
EXPNO     10
PROCNO    1
Date_     20110628
Time      23.36
INSTRUM   spect
PROBHD    5 mm PABBO BB-
PULPROG   zgpg30
TD         65536
SOLVENT   CDC13
NS         1024
DS         4
SWH        18028.846 Hz
FIDRES     0.275098 Hz
AQ         1.8175818 sec
RG         2050
DW         27.733 usec
DE         10.00 usec
TE         299.0 K
D1         2.00000000 sec
D11        0.03000000 sec
TD0        1

```

```

===== CHANNEL f1 =====
NUC1      13C
P1         10.00 usec
PL1        -0.50 dB
PL1W       33.25691986 W
SFO1       75.4752953 MHz

```

```

===== CHANNEL f2 =====
CPDPRG2   waltz16
NUC2       1H
PCPD2      72.00 usec
PL2         0.00 dB
PL12        17.00 dB
PL13        17.00 dB
PL2W       11.25325108 W
PL12W       0.22453187 W
PL13W       0.22453187 W
SFO2       300.1312005 MHz
SI          32768
SF          75.4677522 MHz
WDW         EM
SSB         0
LB          1.00 Hz
GB          0
PC          1.40

```

Erben 1H CDC13

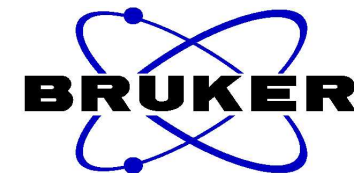

# 12e

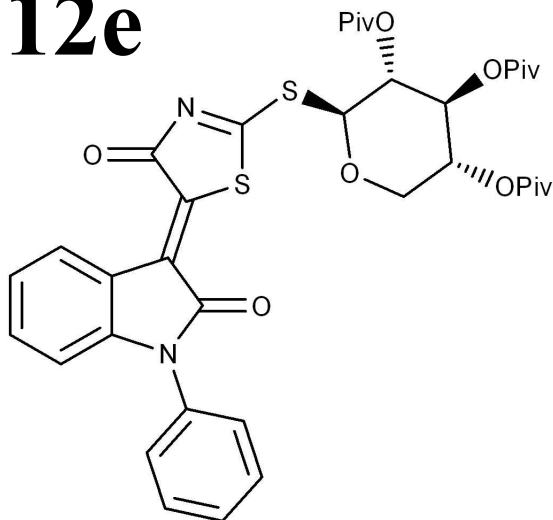

9.104  
9.078  
7.379  
7.376  
7.354  
7.351  
7.328  
7.324  
7.211  
7.185  
7.159  
6.856  
6.830  
6.354  
6.323  
6.162  
6.132  
6.101  
5.574  
5.542  
5.510  
4.310  
4.291  
4.272  
4.253  
3.557  
3.521  
3.485  
1.172  
1.153  
1.025

NAME 110728.u316  
EXPNO 10  
PROCNO 1  
Date\_ 20110728  
Time 14.35  
INSTRUM spect  
PROBHD 5 mm PABBO BB-  
PULPROG zg30  
TD 65536  
SOLVENT CDC13  
NS 16  
DS 2  
SWH 6188.119 Hz  
FIDRES 0.094423 Hz  
AQ 5.2953587 sec  
RG 114  
DW 80.800 usec  
DE 10.00 usec  
TE 298.2 K  
D1 1.00000000 sec  
TDO 1

===== CHANNEL f1 =====  
NUC1 1H  
P1 10.00 usec  
PL1 0.00 dB  
PL1W 11.25325108 W  
SFO1 300.1318534 MHz  
SI 32768  
SF 300.1300130 MHz  
WDW EM  
SSB 0  
LB 0.30 Hz  
GB 0  
PC 1.00

15 14 13 12 ppm

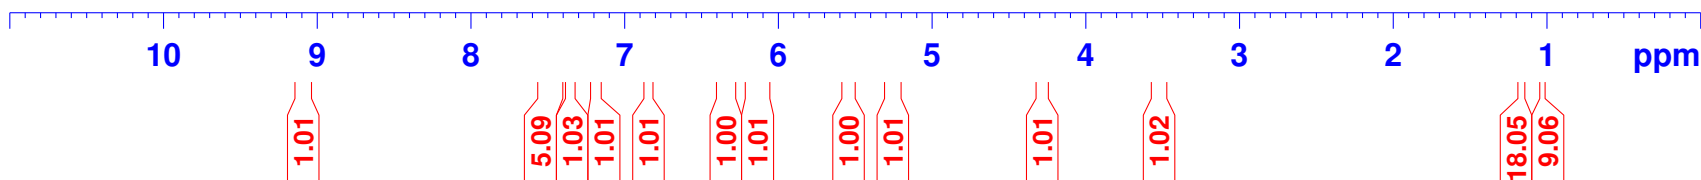

Erben 13C CDCl3

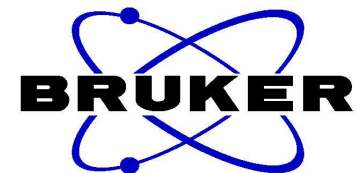

# 12e

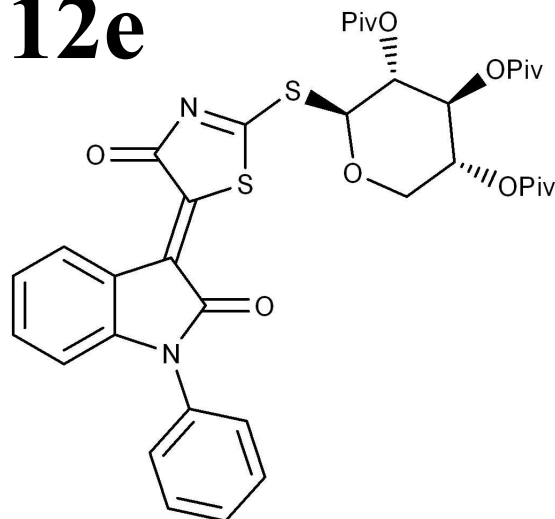

197.60  
177.33  
177.06  
176.91  
166.52  
165.67  
145.64  
133.30  
132.80  
130.41  
129.73  
129.48  
128.60  
126.43  
125.52  
123.86  
119.79  
109.79

82.80  
72.09  
68.37  
67.65  
65.79

38.81  
38.76  
38.72  
27.10  
27.03

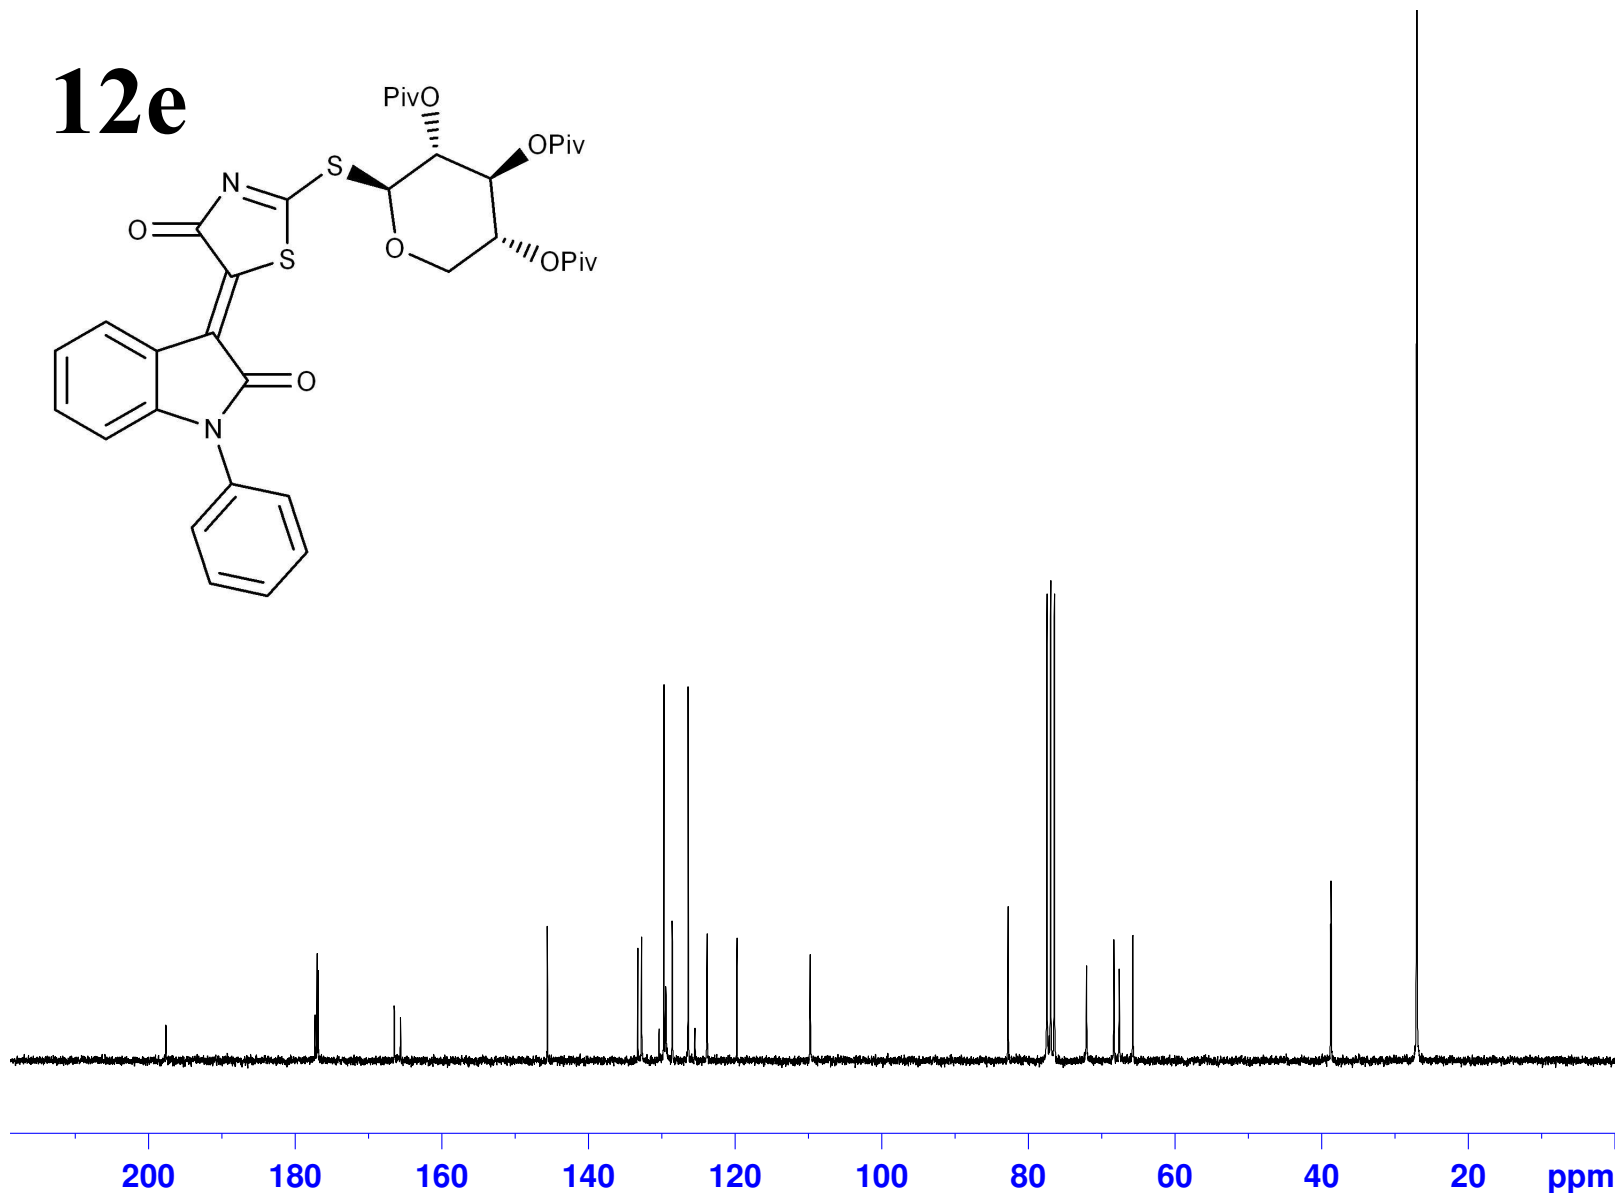

NAME 110728.207  
EXPNO 10  
PROCNO 1  
Date\_ 20110728  
Time 21.50  
INSTRUM spect  
PROBHD 5 mm PABBO BB-  
PULPROG zgpg30  
TD 65536  
SOLVENT CDCl3  
NS 1024  
DS 4  
SWH 15000.000 Hz  
FIDRES 0.228882 Hz  
AQ 2.1845834 sec  
RG 2050  
DW 33.333 usec  
DE 10.00 usec  
TE 297.9 K  
D1 2.00000000 sec  
d11 0.03000000 sec  
DELTA 1.89999998 sec  
TD0 1

==== CHANNEL f1 =====  
NUC1 13C  
P1 10.00 usec  
PL1 -1.00 dB  
SFO1 62.9015280 MHz

==== CHANNEL f2 =====  
CPDPRG2 waltz16  
NUC2 1H  
PCPD2 70.00 usec  
PL12 15.00 dB  
PL13 15.00 dB  
PL2 -2.50 dB  
SFO2 250.1310005 MHz  
SI 32768  
SF 62.8952421 MHz  
WDW EM  
SSB 0  
LB 1.00 Hz  
GB 0  
PC 1.40

Erben 1H CDC13

8.581  
8.576  
8.562  
8.557  
7.049  
7.044  
7.032  
7.027  
7.015  
7.010  
6.807  
6.798  
6.790  
6.781  
6.526  
6.396  
6.378  
6.181  
6.162  
6.144  
5.569  
5.550  
5.531  
5.456  
5.436  
5.416  
4.386  
4.383  
4.361  
4.358  
4.051  
4.043  
4.026  
4.018  
3.949  
3.945  
3.942  
3.938  
3.929  
3.925  
3.922  
3.918  
1.245  
1.180  
1.156  
1.056

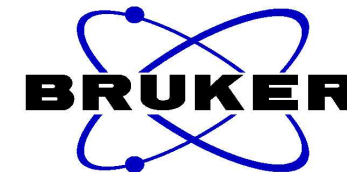

12f

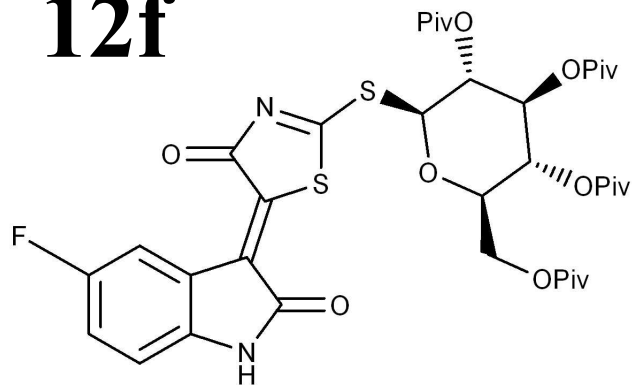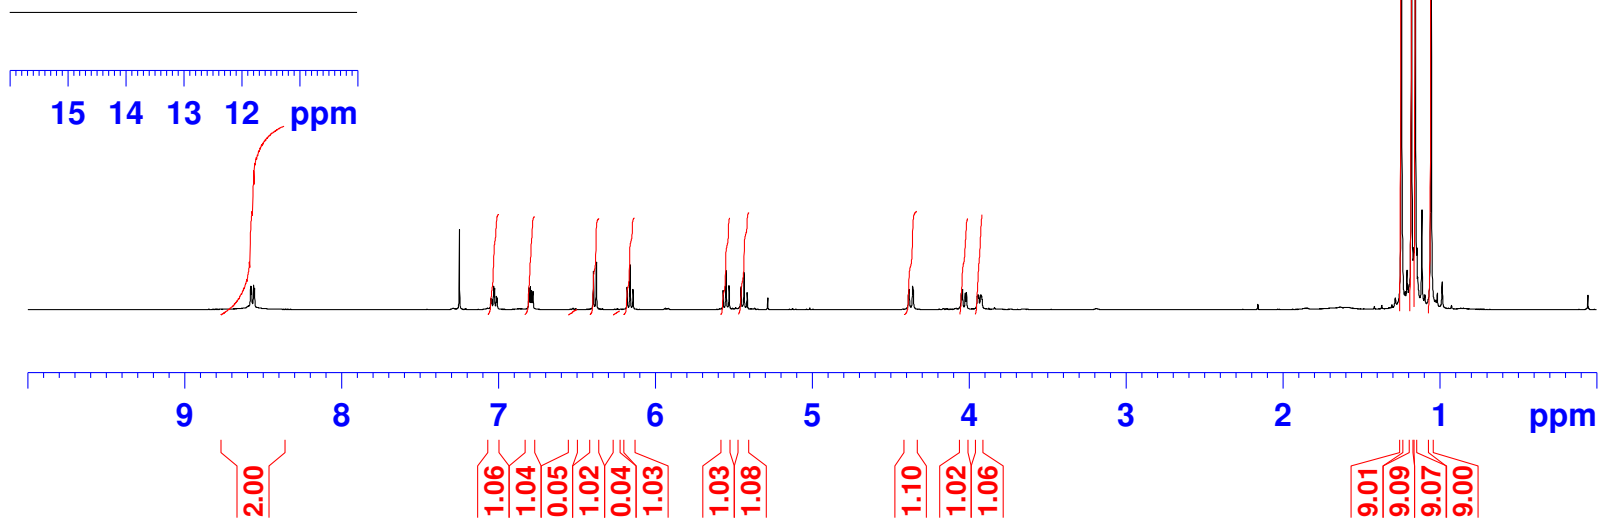

NAME 101022.501  
EXPNO 20  
PROCNO 1  
Date\_ 20101023  
Time 11.17  
INSTRUM spect  
PROBHD 5 mm BBO BB-1H  
PULPROG zg30  
TD 65536  
SOLVENT CDC13  
NS 16  
DS 2  
SWH 10330.578 Hz  
FIDRES 0.157632 Hz  
AQ 3.1720407 sec  
RG 101.6  
DW 48.400 usec  
DE 6.00 usec  
TE 300.0 K  
D1 1.00000000 sec

===== CHANNEL f1 =====  
NUC1 1H  
P1 8.60 usec  
PL1 -3.00 dB  
SFO1 500.1330885 MHz  
SI 32768  
SF 500.1300180 MHz  
WDW EM  
SSB 0  
LB 0.30 Hz  
GB 0  
PC 1.00

Erben 1H CDC13

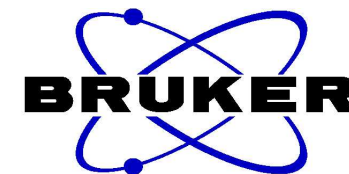

# 12f

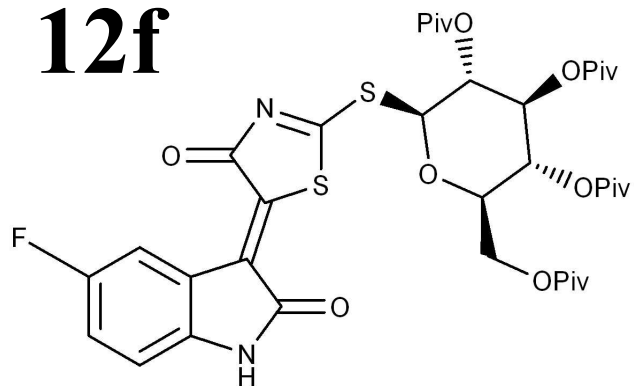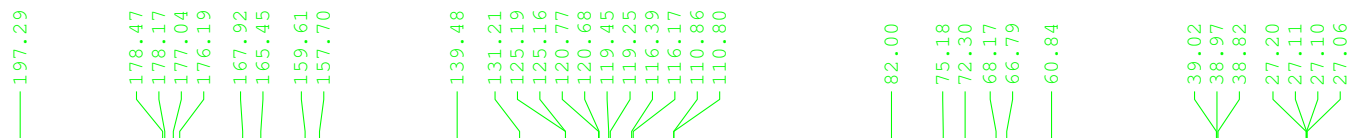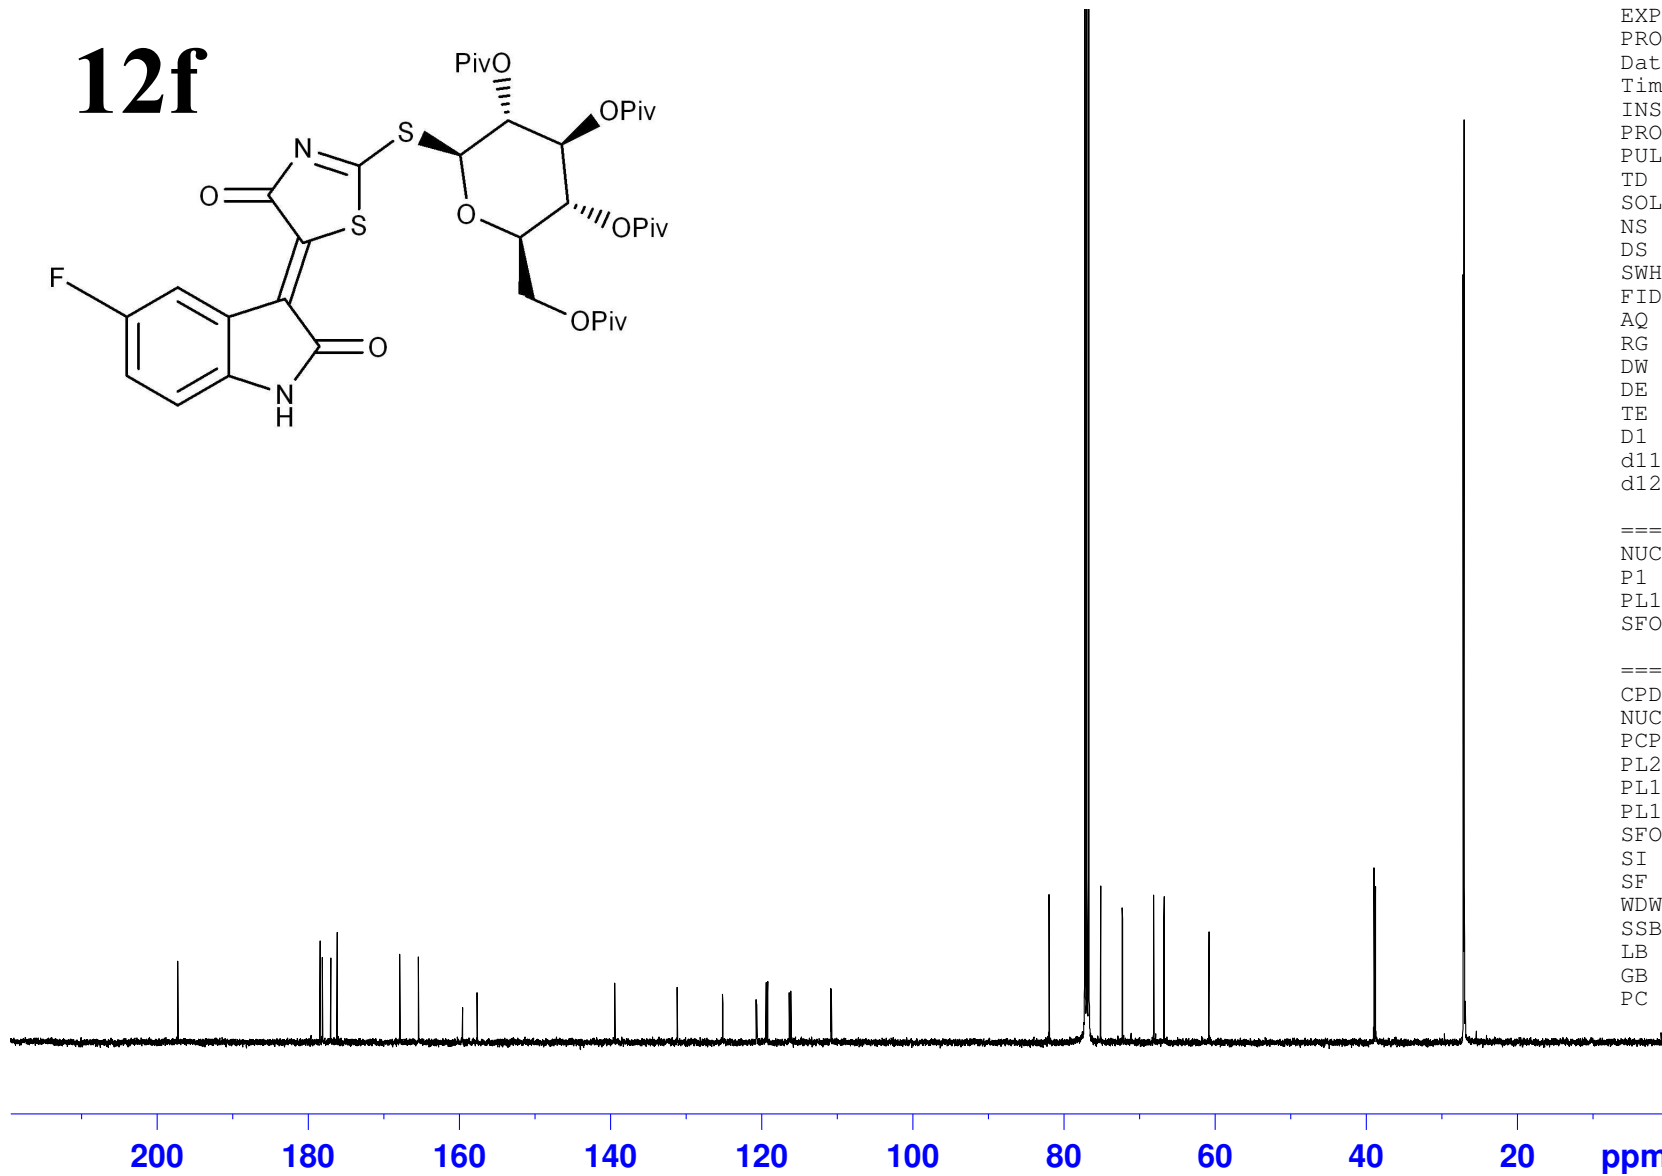

NAME 101022.501  
EXPNO 26  
PROCNO 1  
Date\_ 20101024  
Time 2.35  
INSTRUM spect  
PROBHD 5 mm BBO BB-1H  
PULPROG zgpg30  
TD 65536  
SOLVENT CDC13  
NS 5120  
DS 4  
SWH 30030.029 Hz  
FIDRES 0.458222 Hz  
AQ 1.0912410 sec  
RG 101.6  
DW 16.650 usec  
DE 6.00 usec  
TE 300.0 K  
D1 2.00000000 sec  
d11 0.03000000 sec  
d12 0.00002000 sec

==== CHANNEL f1 =====  
NUC1 13C  
P1 9.00 usec  
PL1 4.80 dB  
SFO1 125.7703643 MHz

==== CHANNEL f2 =====  
CPDPRG2 waltz16  
NUC2 1H  
PCPD2 80.00 usec  
PL2 -3.00 dB  
PL12 17.50 dB  
PL13 20.00 dB  
SFO2 500.1320005 MHz  
SI 32768  
SF 125.7577911 MHz  
WDW EM  
SSB 0  
LB 1.00 Hz  
GB 0  
PC 1.40



Erben 1H CDC13

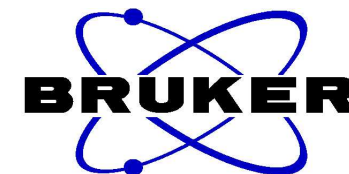

8.723  
8.721  
8.697  
8.695  
8.615  
8.589  
7.138  
7.109  
7.080  
6.547  
6.516  
6.485  
6.396  
6.365  
6.203  
6.172  
6.141  
5.935  
5.904  
5.570  
5.538  
5.507  
5.430  
5.397  
5.365  
4.362  
4.357  
4.320  
4.316  
4.075  
4.060  
4.033  
4.019

1.219  
1.176  
1.160  
1.135  
1.112  
1.023  
0.970

12g

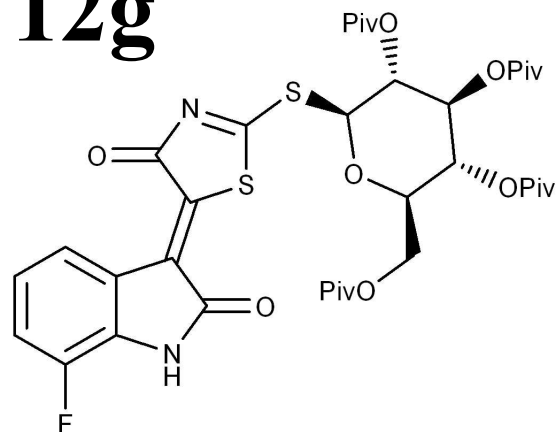

NAME 110622.u311  
EXPNO 10  
PROCNO 1  
Date\_ 20110622  
Time 12.37  
INSTRUM spect  
PROBHD 5 mm PABBO BB-  
PULPROG zg30  
TD 65536  
SOLVENT CDC13  
NS 16  
DS 2  
SWH 6188.119 Hz  
FIDRES 0.094423 Hz  
AQ 5.2953587 sec  
RG 101  
DW 80.800 usec  
DE 10.00 usec  
TE 298.2 K  
D1 1.00000000 sec  
TD0 1

===== CHANNEL f1 =====  
NUC1 1H  
P1 10.00 usec  
PL1 0.00 dB  
PL1W 11.25325108 W  
SFO1 300.1318534 MHz  
SI 32768  
SF 300.1300122 MHz  
WDW EM  
SSB 0  
LB 0.30 Hz  
GB 0  
PC 1.00

15 14 13 12 11 ppm

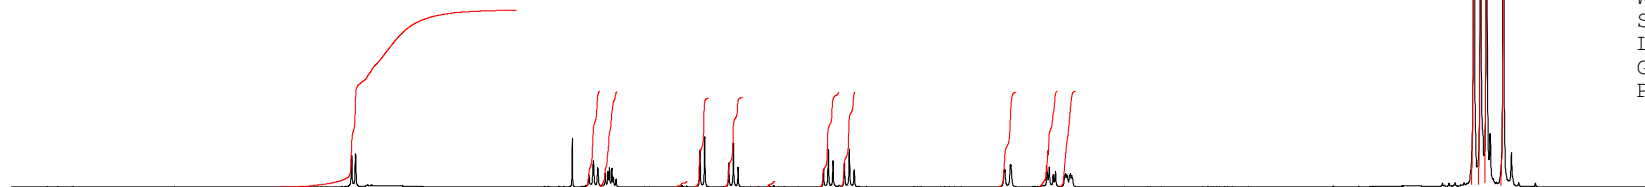

10 9 8 7 6 5 4 3 2 1 ppm

1.86  
1.01  
1.00  
0.06  
0.94  
0.94  
0.06  
1.00  
1.00  
1.00  
1.00  
1.01  
1.01  
9.06  
9.06  
9.03  
9.01

Erben 13C CDCl3

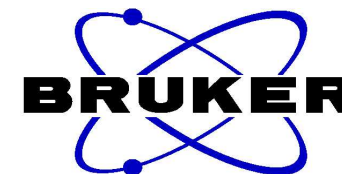

12g

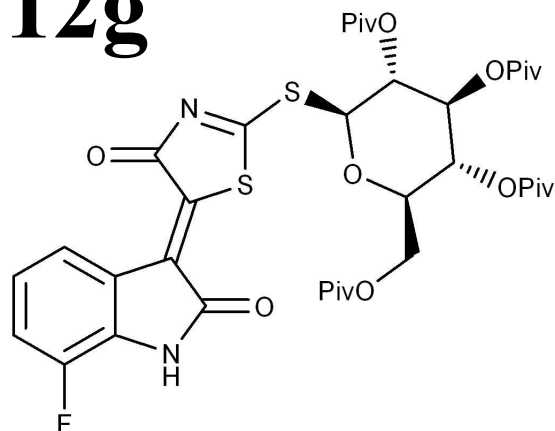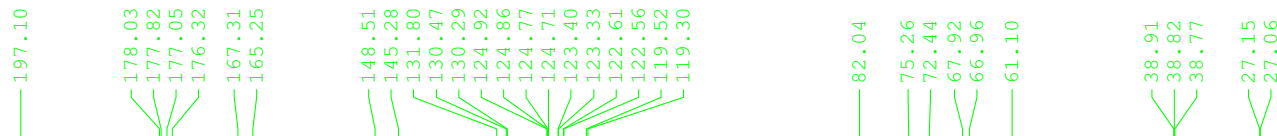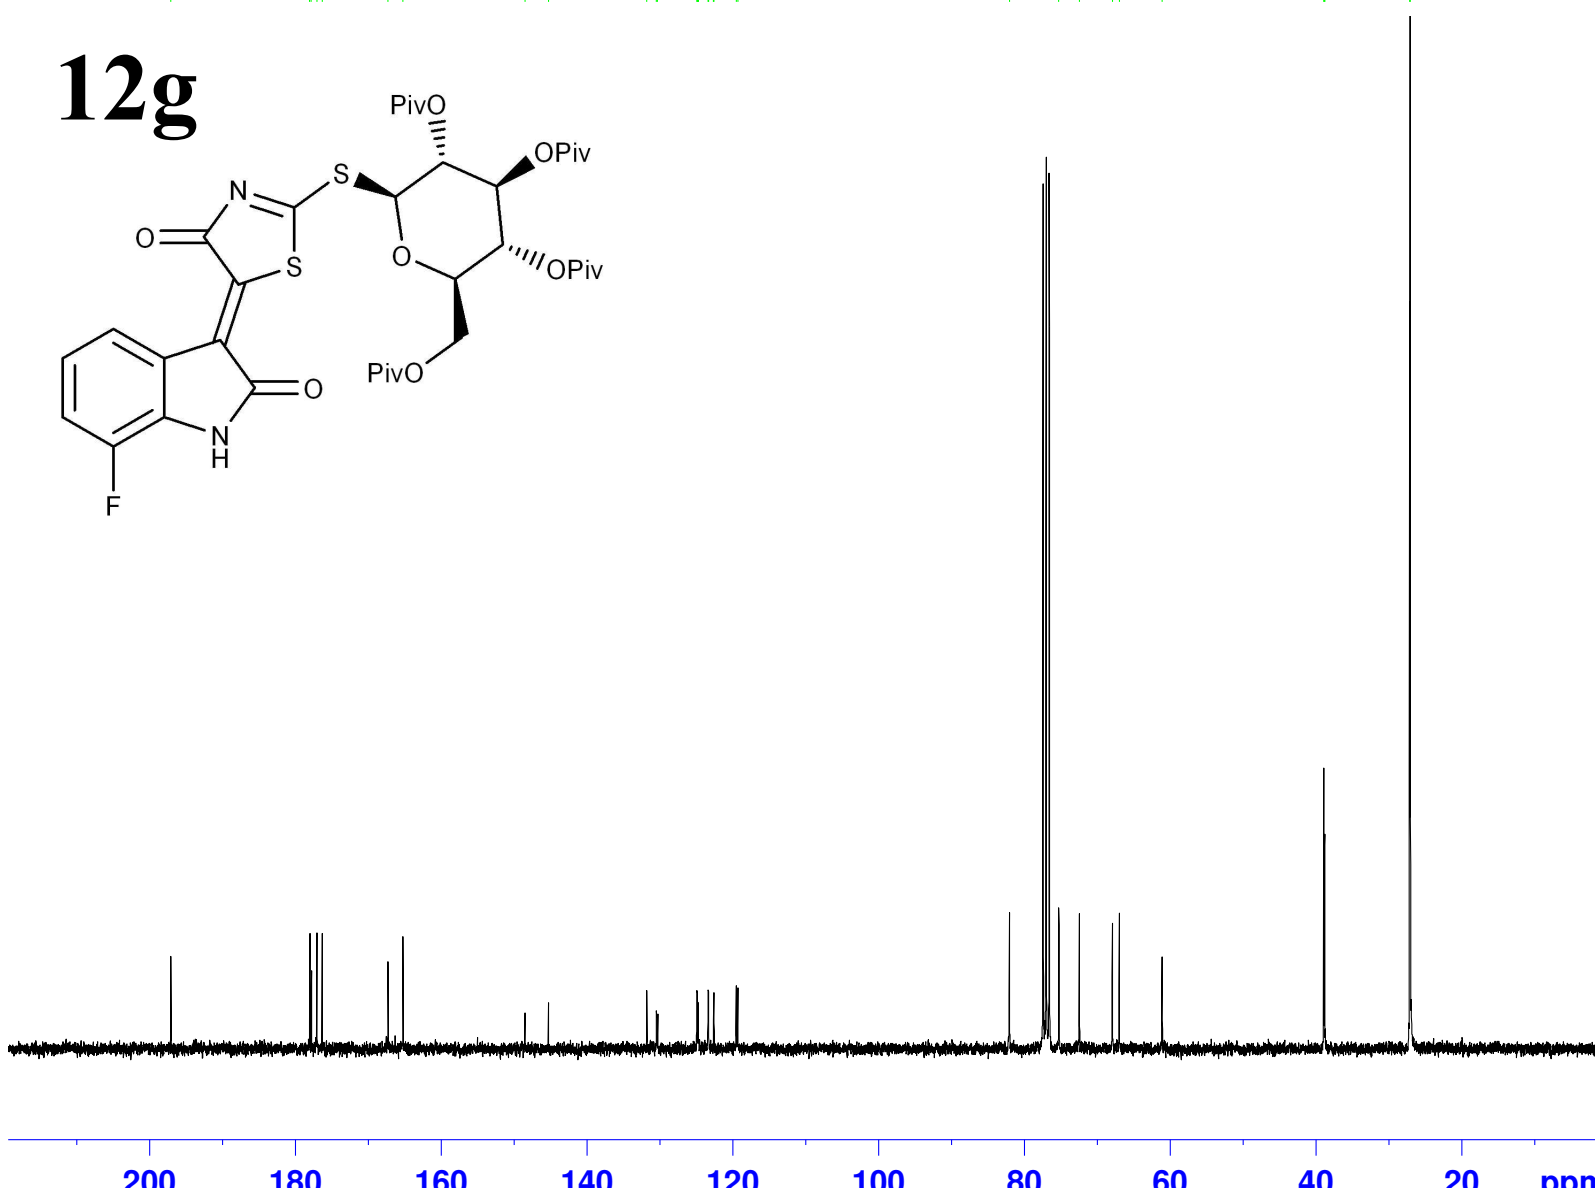

NAME 110622.u311  
EXPNO 12  
PROCNO 1  
Date\_ 20110622  
Time 17.08  
INSTRUM spect  
PROBHD 5 mm PABBO BB-  
PULPROG zgpg30  
TD 65536  
SOLVENT CDCl3  
NS 1024  
DS 4  
SWH 18028.846 Hz  
FIDRES 0.275098 Hz  
AQ 1.8175818 sec  
RG 2050  
DW 27.733 usec  
DE 10.00 usec  
TE 299.1 K  
D1 2.0000000 sec  
D11 0.0300000 sec  
TDO 1

==== CHANNEL f1 =====  
NUC1 13C  
P1 10.00 usec  
PL1 -0.50 dB  
PL1W 33.25691986 W  
SFO1 75.4752953 MHz

==== CHANNEL f2 =====  
CPDPRG2 waltz16  
NUC2 1H  
PCPD2 72.00 usec  
PL2 0.00 dB  
PL12 17.00 dB  
PL13 17.00 dB  
PL2W 11.25325108 W  
PL12W 0.22453187 W  
PL13W 0.22453187 W  
SFO2 300.1312005 MHz  
SI 32768  
SF 75.4677515 MHz  
WDW EM  
SSB 0  
LB 1.00 Hz  
GB 0  
PC 1.40

Erben 1H CDC13

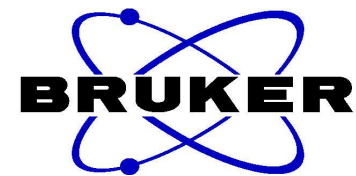

# 12h

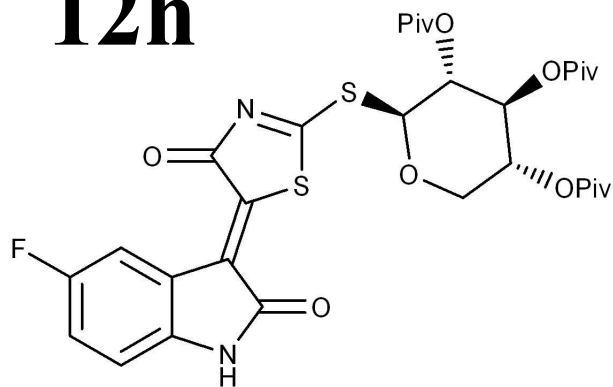

8.624  
8.599  
8.454

6.331  
6.303  
6.138  
6.109  
6.078  
5.587  
5.558  
5.525

4.301  
4.283  
4.263  
4.247  
3.552  
3.515  
3.479

1.168  
1.053

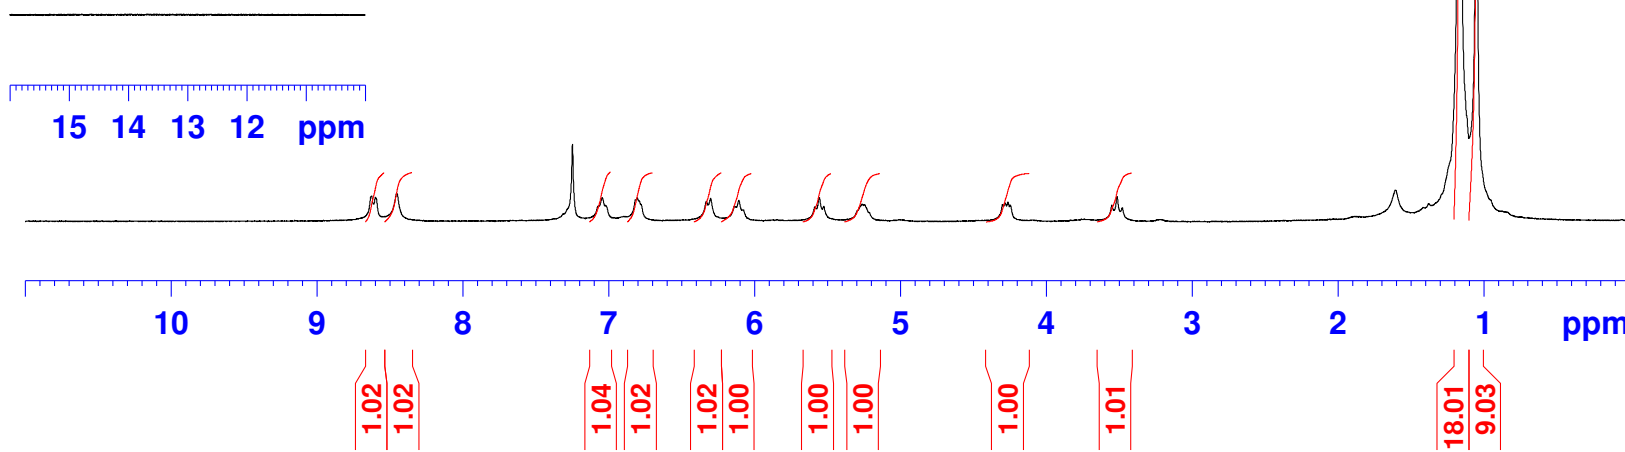

NAME 110720.u330  
EXPNO 10  
PROCNO 1  
Date\_ 20110720  
Time 12.48  
INSTRUM spect  
PROBHD 5 mm PABBO BB-  
PULPROG zg30  
TD 65536  
SOLVENT CDC13  
NS 16  
DS 2  
SWH 6188.119 Hz  
FIDRES 0.094423 Hz  
AQ 5.2953587 sec  
RG 144  
DW 80.800 use  
DE 10.00 use  
TE 298.3 K  
D1 1.00000000 sec  
TD0 1

==== CHANNEL f1 =====  
NUC1 1H  
P1 10.00 use  
PL1 0.00 dB  
PL1W 11.25325108 W  
SFO1 300.1318534 MHz  
SI 32768  
SF 300.1300170 MHz  
WDW EM  
SSB 0  
LB 0.30 Hz  
GB 0  
PC 1.00

Erben 13C CDCl3

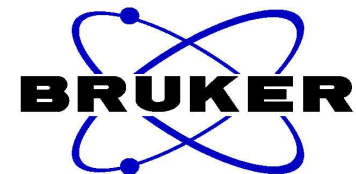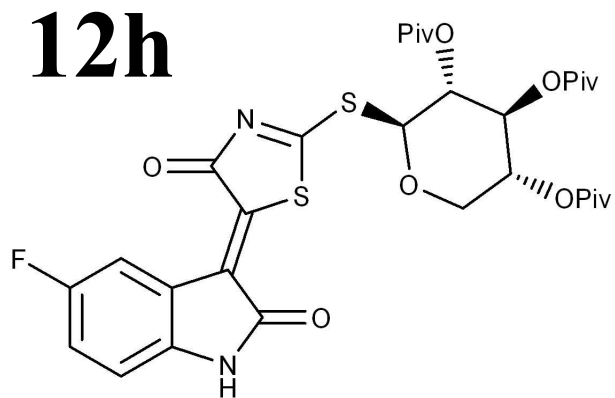

197.23  
178.43  
177.10  
176.97  
168.03  
165.78  
160.30  
157.17  
139.36  
131.24  
125.21  
125.18  
120.82  
120.70  
119.60  
119.28  
116.63  
116.30  
110.90  
110.79

82.77

71.99  
68.35  
68.04  
65.81

39.01  
38.82

27.15  
27.08

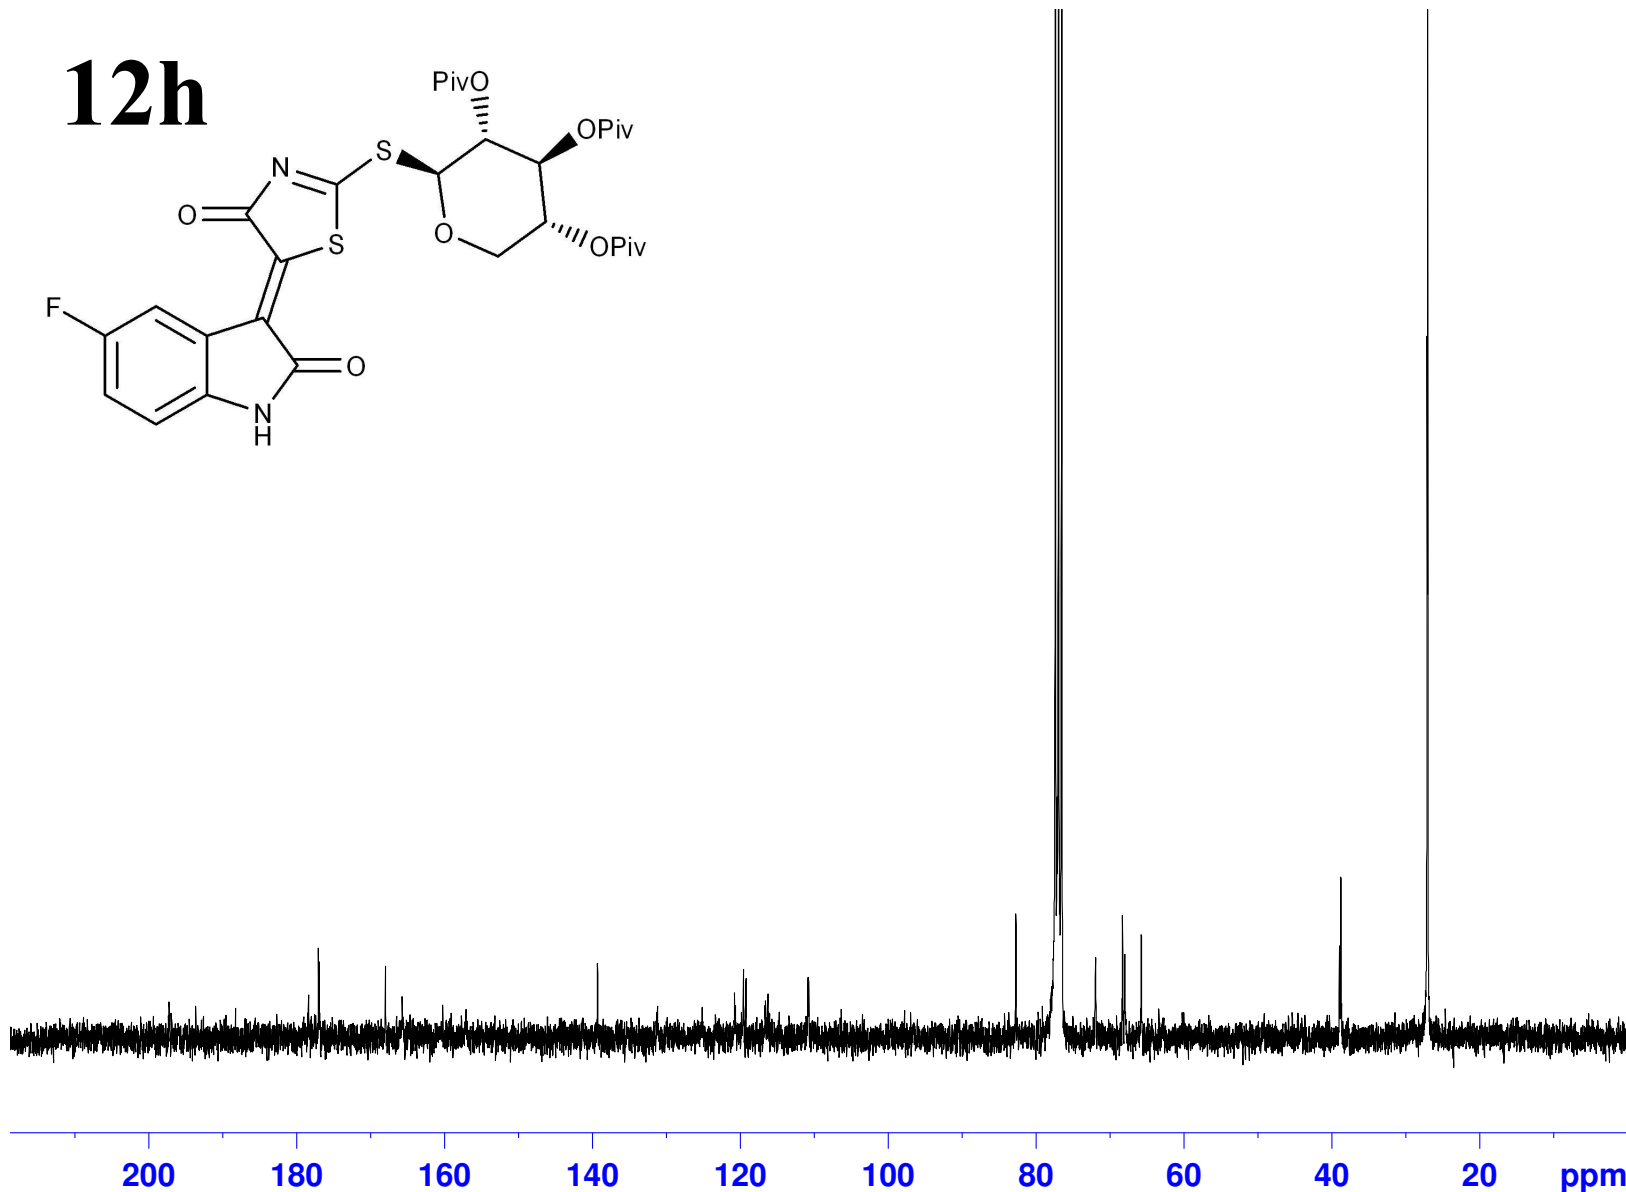

NAME 110721.u326  
EXPNO 10  
PROCNO 1  
Date\_ 20110721  
Time 20.06  
INSTRUM spect  
PROBHD 5 mm PABBO BB-  
PULPROG zgpg30  
TD 65536  
SOLVENT CDCl3  
NS 3072  
DS 4  
SWH 18028.846 Hz  
FIDRES 0.275098 Hz  
AQ 1.8175818 sec  
RG 2050  
DW 27.733 usec  
DE 10.00 usec  
TE 298.7 K  
D1 2.0000000 sec  
D11 0.03000000 sec  
TD0 1

==== CHANNEL f1 =====  
NUC1 13C  
P1 10.00 usec  
PL1 -0.50 dB  
PL1W 33.25691986 W  
SFO1 75.4752953 MHz

==== CHANNEL f2 =====  
CPDPRG2 waltz16  
NUC2 1H  
PCPD2 72.00 usec  
PL2 0.00 dB  
PL12 17.00 dB  
PL13 17.00 dB  
PL2W 11.25325108 W  
PL12W 0.22453187 W  
PL13W 0.22453187 W  
SFO2 300.1312005 MHz  
SI 32768  
SF 75.4677515 MHz  
WDW EM  
SSB 0  
LB 1.00 Hz  
GB 0  
PC 1.40

Erben 1H CDC13

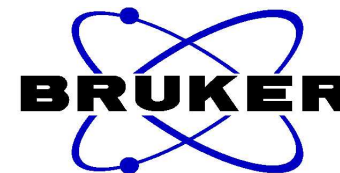

# 12i

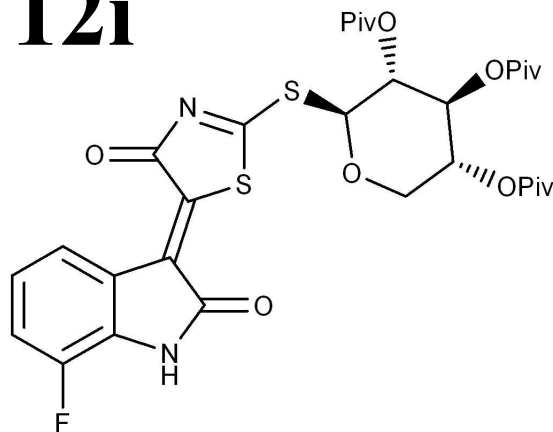

8.738  
8.712  
7.145  
7.116  
7.086  
6.328  
6.298  
6.134  
6.103  
6.072  
5.576  
5.544  
5.513  
4.293  
4.274  
4.255  
4.236  
3.551  
3.515  
3.479  
1.165  
1.148  
1.027

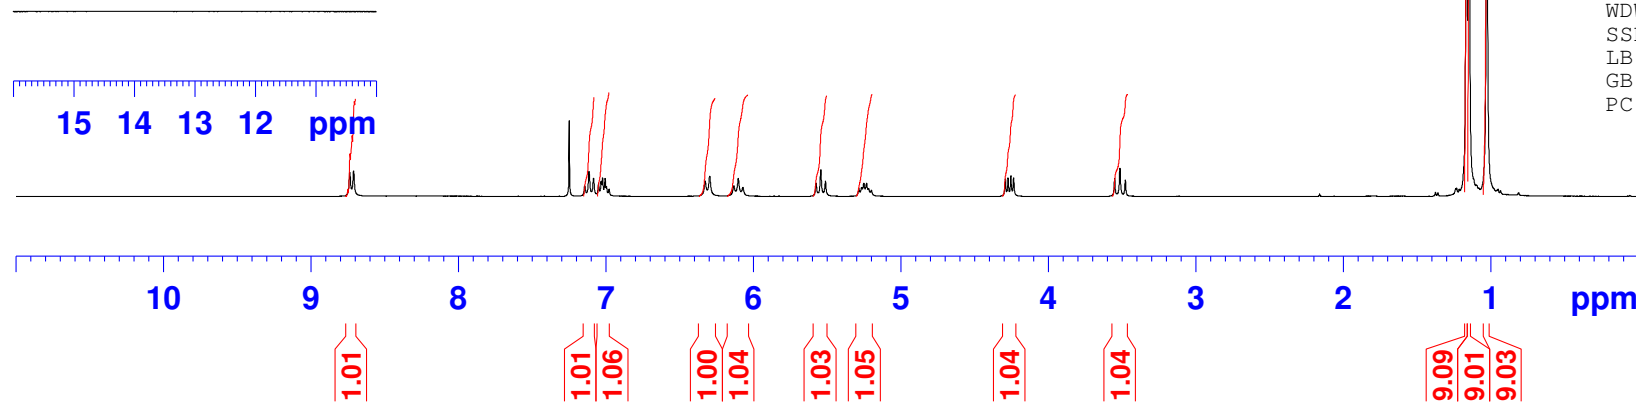

```
NAME 110701.u314
EXPNO 10
PROCNO 1
Date_ 20110701
Time 12.52
INSTRUM spect
PROBHD 5 mm PABBO BB-
PULPROG zg30
TD 65536
SOLVENT CDC13
NS 16
DS 2
SWH 6188.119 Hz
FIDRES 0.094423 Hz
AQ 5.2953587 sec
RG 128
DW 80.800 usec
DE 10.00 usec
TE 298.2 K
D1 1.00000000 sec
TD0 1
```

```
===== CHANNEL f1 =====
NUC1 1H
P1 10.00 usec
PL1 0.00 dB
PL1W 11.25325108 W
SFO1 300.1318534 MHz
SI 32768
SF 300.1300124 MHz
WDW EM
SSB 0
LB 0.30 Hz
GB 0
PC 1.00
```

Erben 13C CDCl3

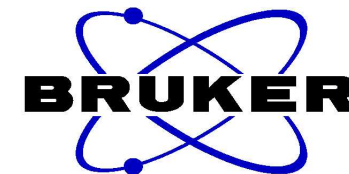

# 12i

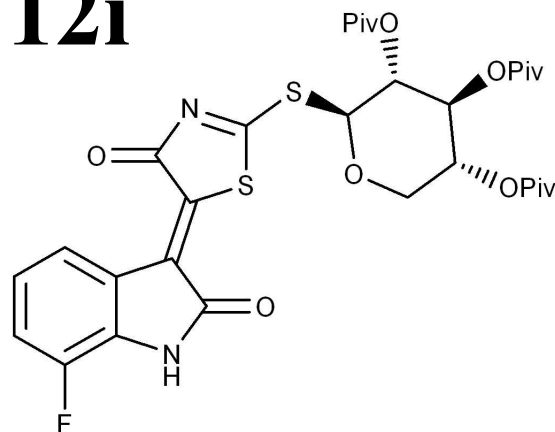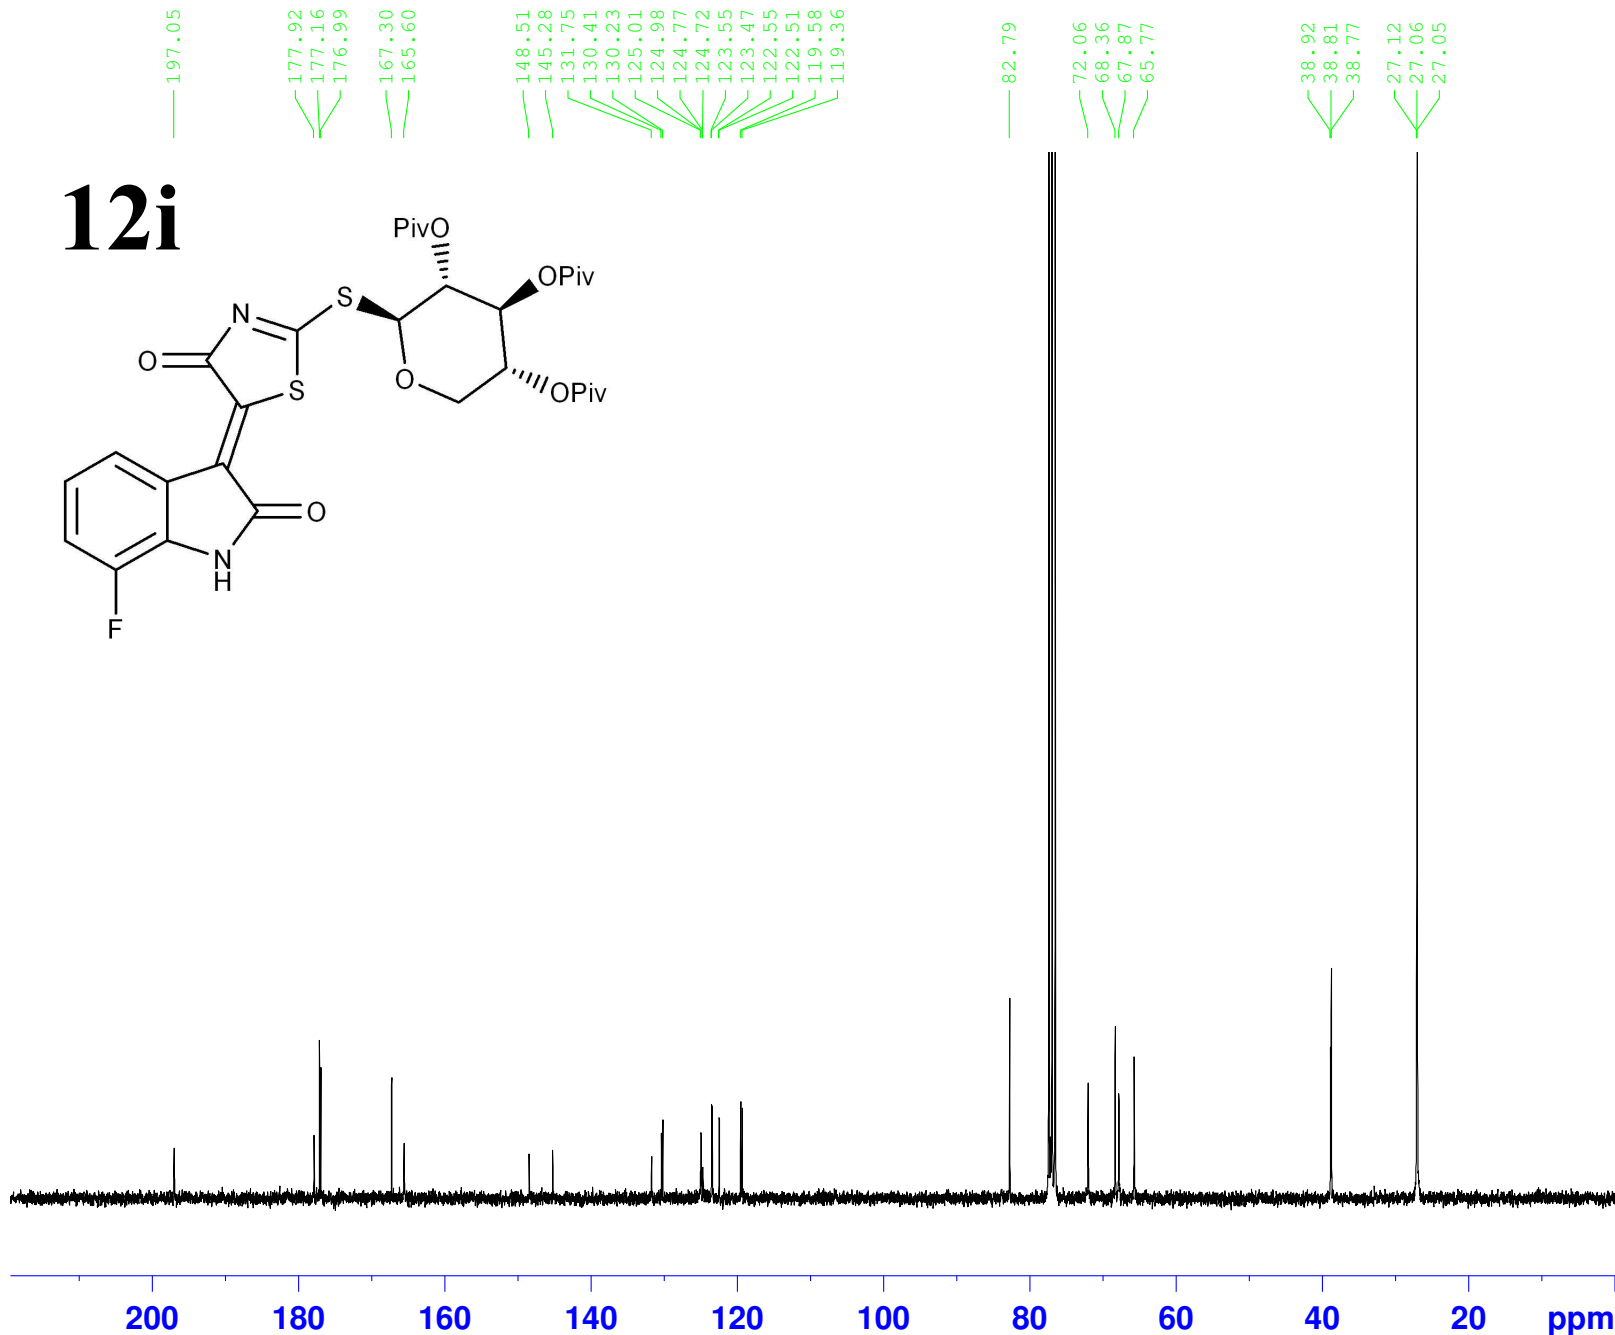

```
NAME          110707.u326
EXPNO          10
PROCNO         1
Date_          20110707
Time           20.23
INSTRUM        spect
PROBHD         5 mm PABBO BB-
PULPROG        zgpg30
TD             65536
SOLVENT        CDC13
NS             2048
DS             4
SWH            18028.846 Hz
FIDRES         0.275098 Hz
AQ            1.8175818 sec
RG             2050
DW            27.733 usec
DE            10.00 usec
TE            298.3 K
D1            2.0000000 sec
D11           0.0300000 sec
TD0            1
```

```
===== CHANNEL f1 =====
NUC1           13C
P1             10.00 usec
PL1            -0.50 dB
PL1W          33.25691986 W
SFO1           75.4752953 MHz
```

```
===== CHANNEL f2 =====
CPDPRG2        waltz16
NUC2            1H
PCPD2          72.00 usec
PL2            0.00 dB
PL12           17.00 dB
PL13           17.00 dB
PL2W          11.25325108 W
PL12W          0.22453187 W
PL13W          0.22453187 W
SFO2          300.1312005 MHz
SI             32768
SF            75.4677516 MHz
WDW            EM
SSB            0
LB             1.00 Hz
GB             0
PC             1.40
```

Erben 1H CDC13

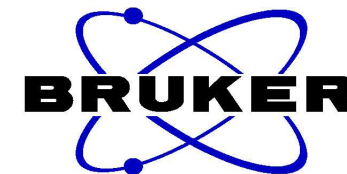

# 12j

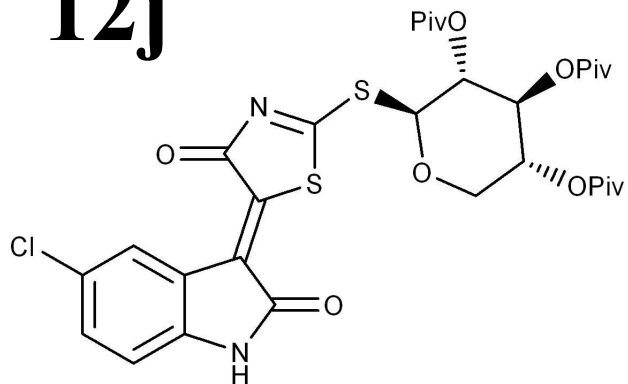

8.710  
7.308  
7.302  
7.280  
7.274  
6.785  
6.758  
6.341  
6.310  
6.152  
6.121  
6.090  
5.604  
5.572  
5.540  
4.301  
4.283  
4.263  
4.245  
3.556  
3.520  
3.483  
1.182  
1.173  
1.078

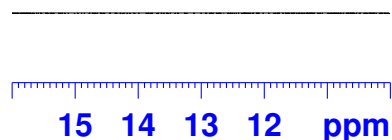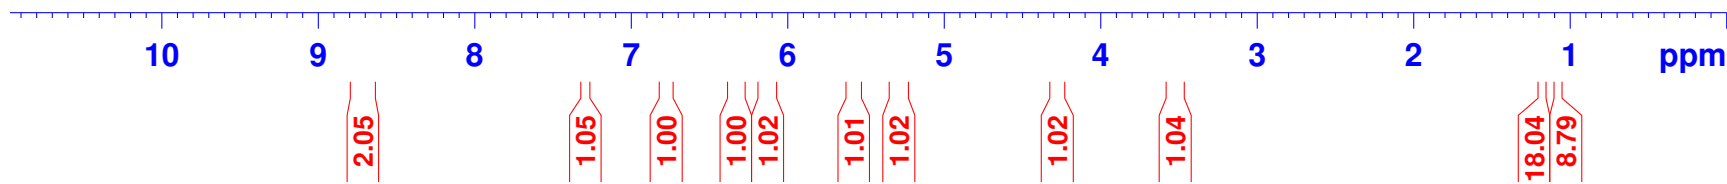

NAME 110715.u334  
EXPNO 10  
PROCNO 1  
Date\_ 20110716  
Time 1.20  
INSTRUM spect  
PROBHD 5 mm PABBO BB-  
PULPROG zg30  
TD 65536  
SOLVENT CDC13  
NS 16  
DS 2  
SWH 6188.119 Hz  
FIDRES 0.094423 Hz  
AQ 5.2953587 sec  
RG 144  
DW 80.800 usec  
DE 10.00 usec  
TE 298.2 K  
D1 1.00000000 sec  
TD0 1

===== CHANNEL f1 =====  
NUC1 1H  
P1 10.00 usec  
PL1 0.00 dB  
PL1W 11.25325108 W  
SFO1 300.1318534 MHz  
SI 32768  
SF 300.1300120 MHz  
WDW EM  
SSB 0  
LB 0.30 Hz  
GB 0  
PC 1.00

Erben 13C CDCl3

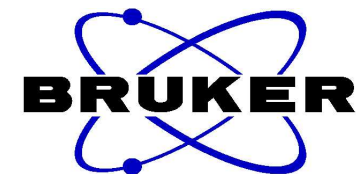

12j

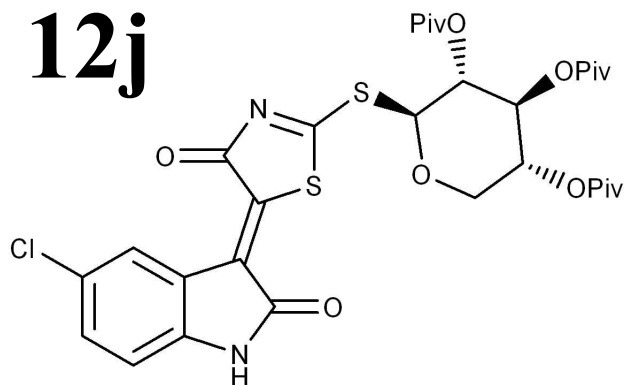

197.24

179.33

177.09

176.93

167.55

165.73

141.84

132.43

131.08

128.83

128.25

124.49

120.61

111.37

82.67

71.92

68.31

68.26

65.76

39.11

38.81

27.16

27.08

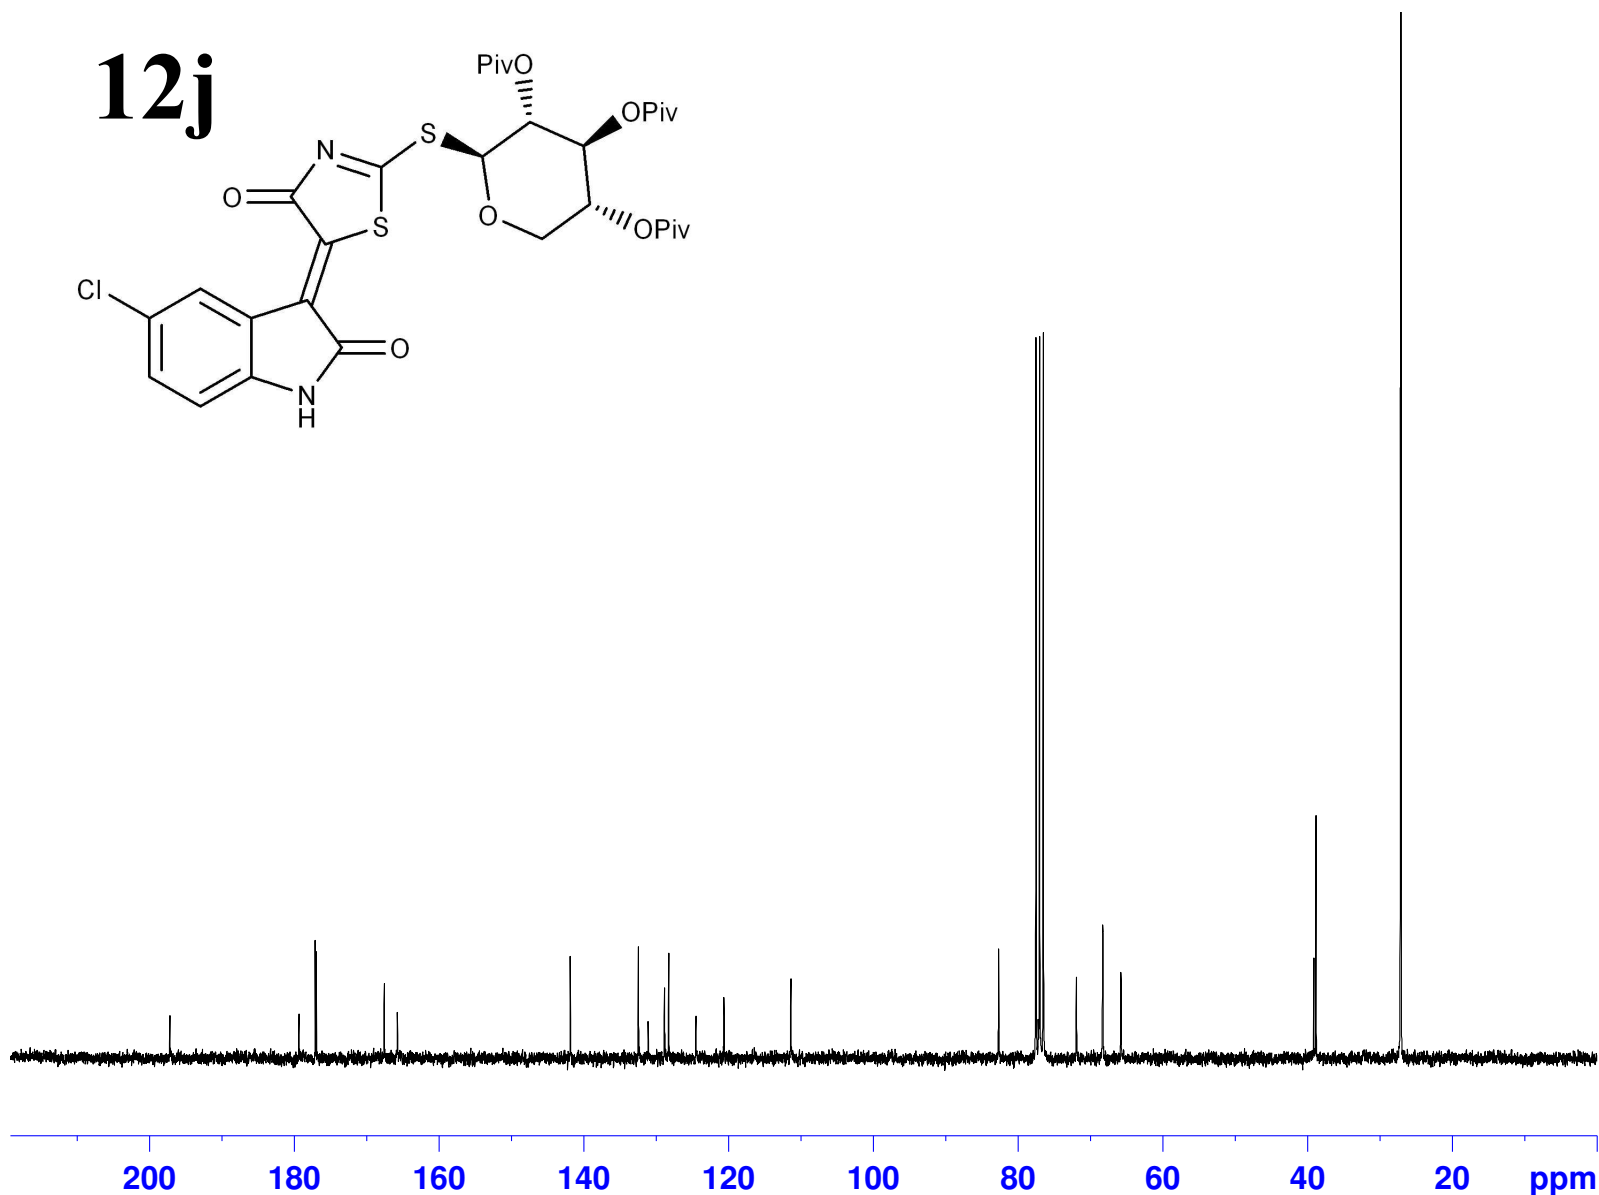

NAME 110713.202  
EXPNO 10  
PROCNO 1  
Date\_ 20110713  
Time 18.05  
INSTRUM spect  
PROBHD 5 mm PABBO BB-  
PULPROG zgpg30  
TD 65536  
SOLVENT CDCl3  
NS 1024  
DS 4  
SWH 15000.000 Hz  
FIDRES 0.228882 Hz  
AQ 2.1845834 sec  
RG 2050  
DW 33.333 usec  
DE 10.00 usec  
TE 298.9 K  
D1 2.00000000 sec  
d11 0.03000000 sec  
DELTA 1.89999998 sec  
TD0 1

==== CHANNEL f1 =====  
NUC1 13C  
P1 10.00 usec  
PL1 -1.00 dB  
SFO1 62.9015280 MHz

==== CHANNEL f2 =====  
CPDPRG2 waltz16  
NUC2 1H  
PCPD2 70.00 usec  
PL12 15.00 dB  
PL13 15.00 dB  
PL2 -2.50 dB  
SFO2 250.1310005 MHz  
SI 32768  
SF 62.8952395 MHz  
WDW EM  
SSB 0  
LB 1.00 Hz  
GB 0  
PC 1.40



Erben 1H CDC13

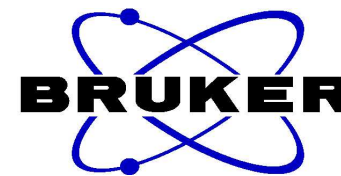

8.912  
8.886  
8.792  
8.766  
8.389  
7.514  
7.487  
7.463  
7.436  
6.998  
6.971  
6.944  
6.545  
6.515  
6.484  
6.390  
6.359  
6.197  
6.166  
6.135  
5.936  
5.905  
5.563  
5.531  
5.500  
5.425  
5.392  
5.359  
4.351  
4.346  
4.309  
4.305  
4.237  
4.076  
4.062  
4.035  
4.020  
1.219  
1.175  
1.157  
1.131  
1.111  
1.020  
0.972

12k

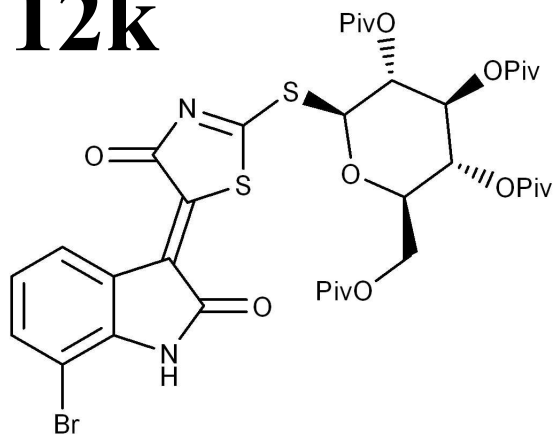

NAME 110623.u317  
EXPNO 10  
PROCNO 1  
Date\_ 20110623  
Time 13.59  
INSTRUM spect  
PROBHD 5 mm PABBO BB-  
PULPROG zg30  
TD 65536  
SOLVENT CDC13  
NS 16  
DS 2  
SWH 6188.119 Hz  
FIDRES 0.094423 Hz  
AQ 5.2953587 sec  
RG 128  
DW 80.800 usec  
DE 10.00 usec  
TE 298.2 K  
D1 1.0000000 sec  
TD0 1

===== CHANNEL f1 =====  
NUC1 1H  
P1 10.00 usec  
PL1 0.00 dB  
PL1W 11.25325108 W  
SFO1 300.1318534 MHz  
SI 32768  
SF 300.1300119 MHz  
WDW EM  
SSB 0  
LB 0.30 Hz  
GB 0  
PC 1.00

15 14 13 12 ppm

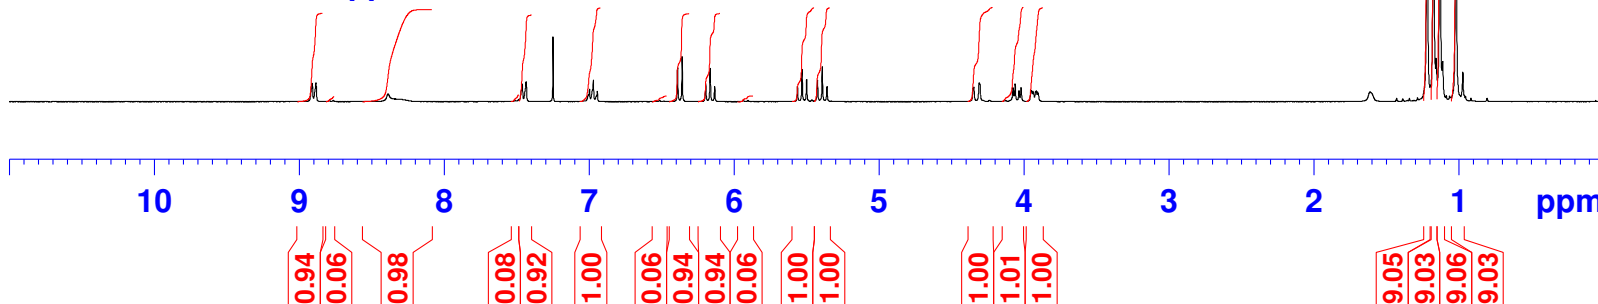

Erben 13C CDCl3



# 12k

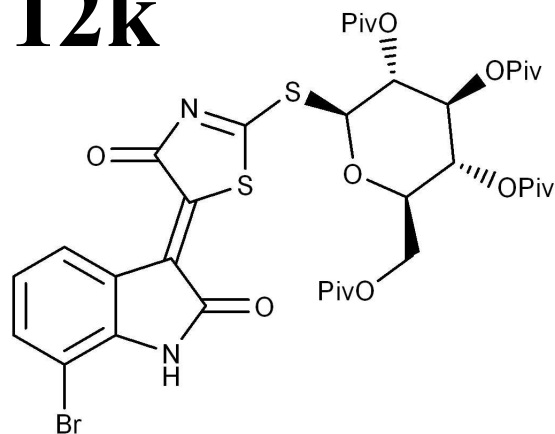

197.05  
177.94  
177.65  
176.98  
176.32  
167.15  
165.24  
142.12  
135.01  
132.10  
127.97  
125.28  
124.23  
121.52  
103.35  
82.06  
75.26  
72.44  
67.86  
66.96  
61.11  
38.90  
38.82  
38.77  
27.15  
27.07

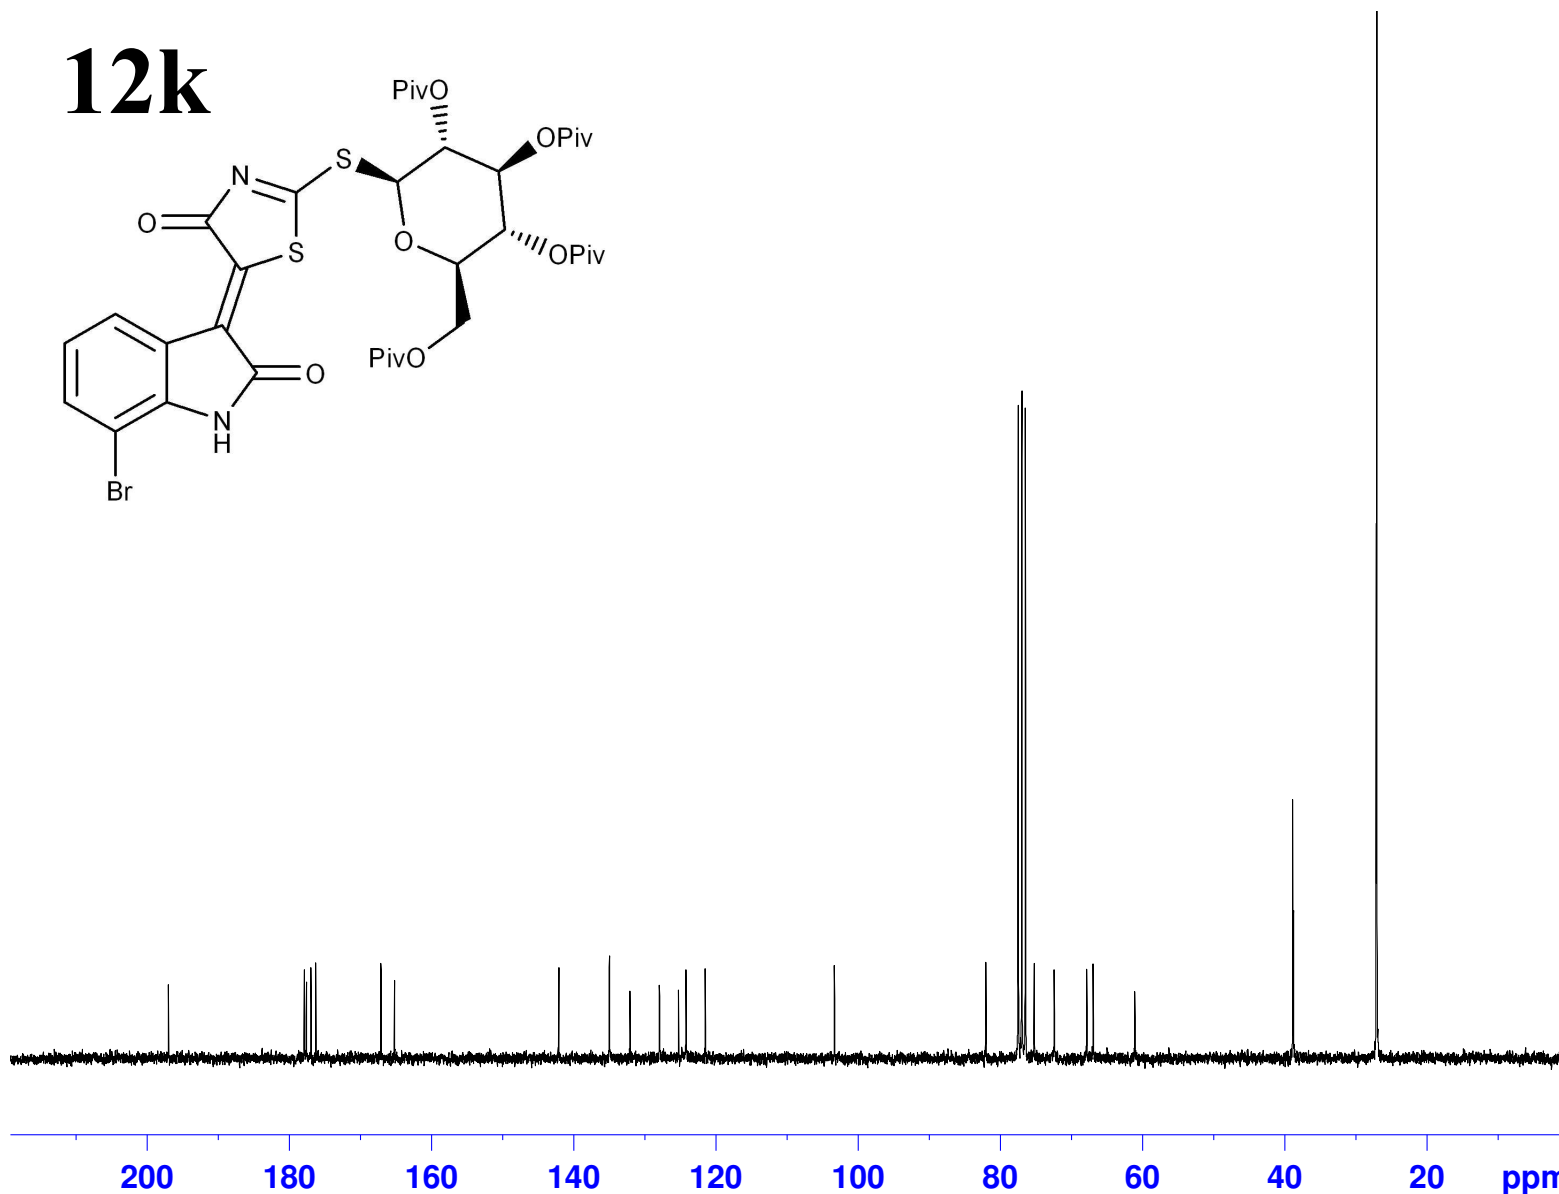

NAME 110624.204  
EXPNO 10  
PROCNO 1  
Date\_ 20110626  
Time 1.21  
INSTRUM spect  
PROBHD 5 mm PABBO BB-  
PULPROG zgpg30  
TD 65536  
SOLVENT CDCl3  
NS 1024  
DS 4  
SWH 15000.000 Hz  
FIDRES 0.228882 Hz  
AQ 2.1845834 sec  
RG 2050  
DW 33.333 usec  
DE 10.00 usec  
TE 299.2 K  
D1 2.00000000 sec  
d11 0.03000000 sec  
DELTA 1.89999998 sec  
TD0 1

===== CHANNEL f1 =====  
NUC1 13C  
P1 10.00 usec  
PL1 -1.00 dB  
SFO1 62.9015280 MHz

===== CHANNEL f2 =====  
CPDPRG2 waltz16  
NUC2 1H  
PCPD2 70.00 usec  
PL12 15.00 dB  
PL13 15.00 dB  
PL2 -2.50 dB  
SFO2 250.1310005 MHz  
SI 32768  
SF 62.8952393 MHz  
WDW EM  
SSB 0  
LB 1.00 Hz  
GB 0  
PC 1.40

Erben 1H CDC13

8.909  
8.883  
7.699  
7.696  
7.672  
7.668  
7.451  
7.424  
6.999  
6.972  
6.946  
6.581  
6.555  
6.529  
6.322  
6.292  
6.128  
6.097  
6.066  
5.571  
5.540  
5.508  
4.292  
4.274  
4.254  
4.236  
3.549  
3.513  
3.476

121

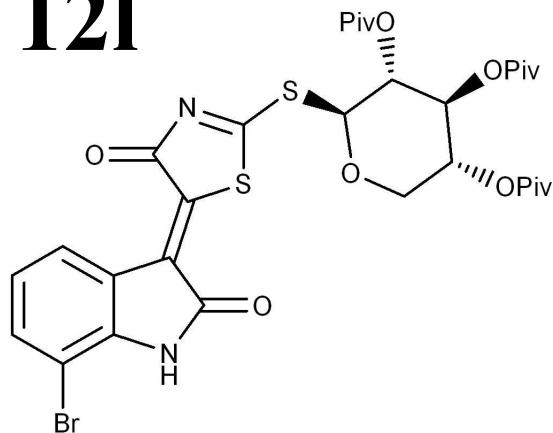

15 14 13 12 ppm

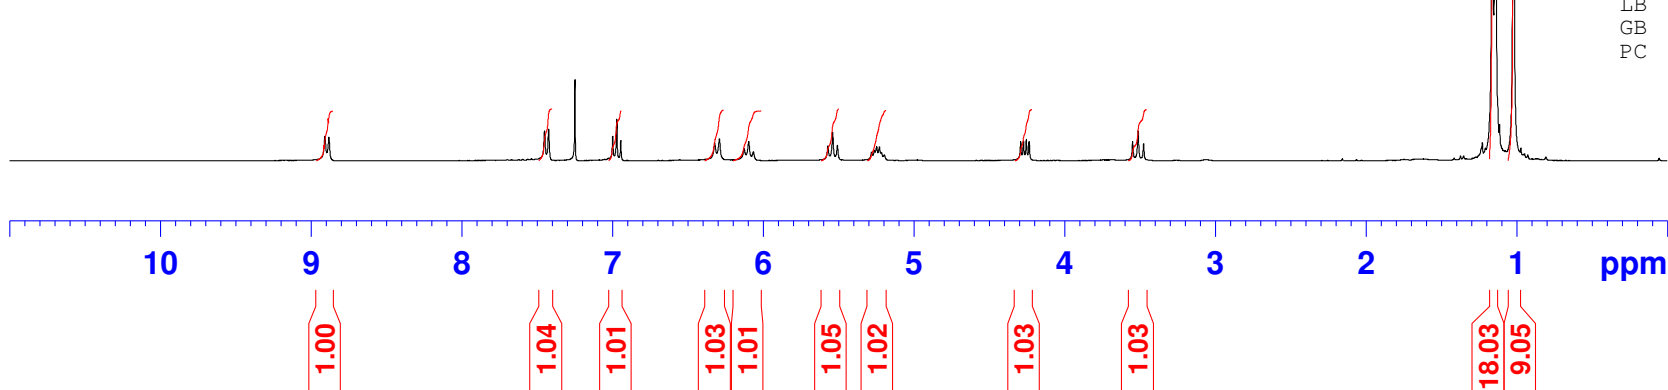

1.163  
1.142  
1.022

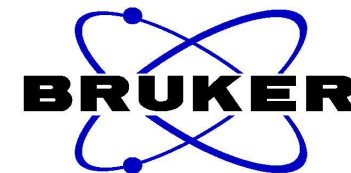

NAME 110630.u322  
EXPNO 10  
PROCNO 1  
Date\_ 20110630  
Time 12.16  
INSTRUM spect  
PROBHD 5 mm PABBO BB-  
PULPROG zg30  
TD 65536  
SOLVENT CDC13  
NS 16  
DS 2  
SWH 6188.119 Hz  
FIDRES 0.094423 Hz  
AQ 5.2953587 sec  
RG 114  
DW 80.800 usec  
DE 10.00 usec  
TE 298.2 K  
D1 1.00000000 sec  
TD0 1

==== CHANNEL f1 =====  
NUC1 1H  
P1 10.00 usec  
PL1 0.00 dB  
PL1W 11.25325108 W  
SFO1 300.1318534 MHz  
SI 32768  
SF 300.1300127 MHz  
WDW EM  
SSB 0  
LB 0.30 Hz  
GB 0  
PC 1.00

Erben 13C CDCl3



121

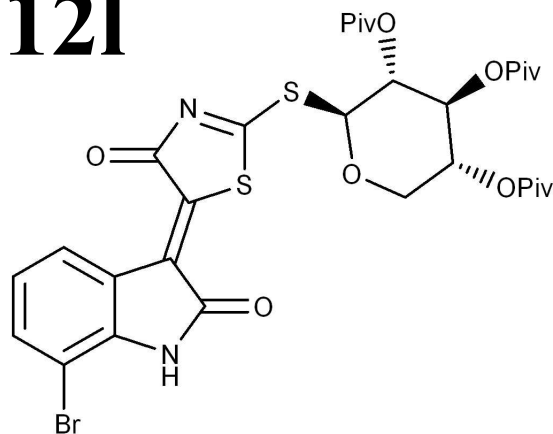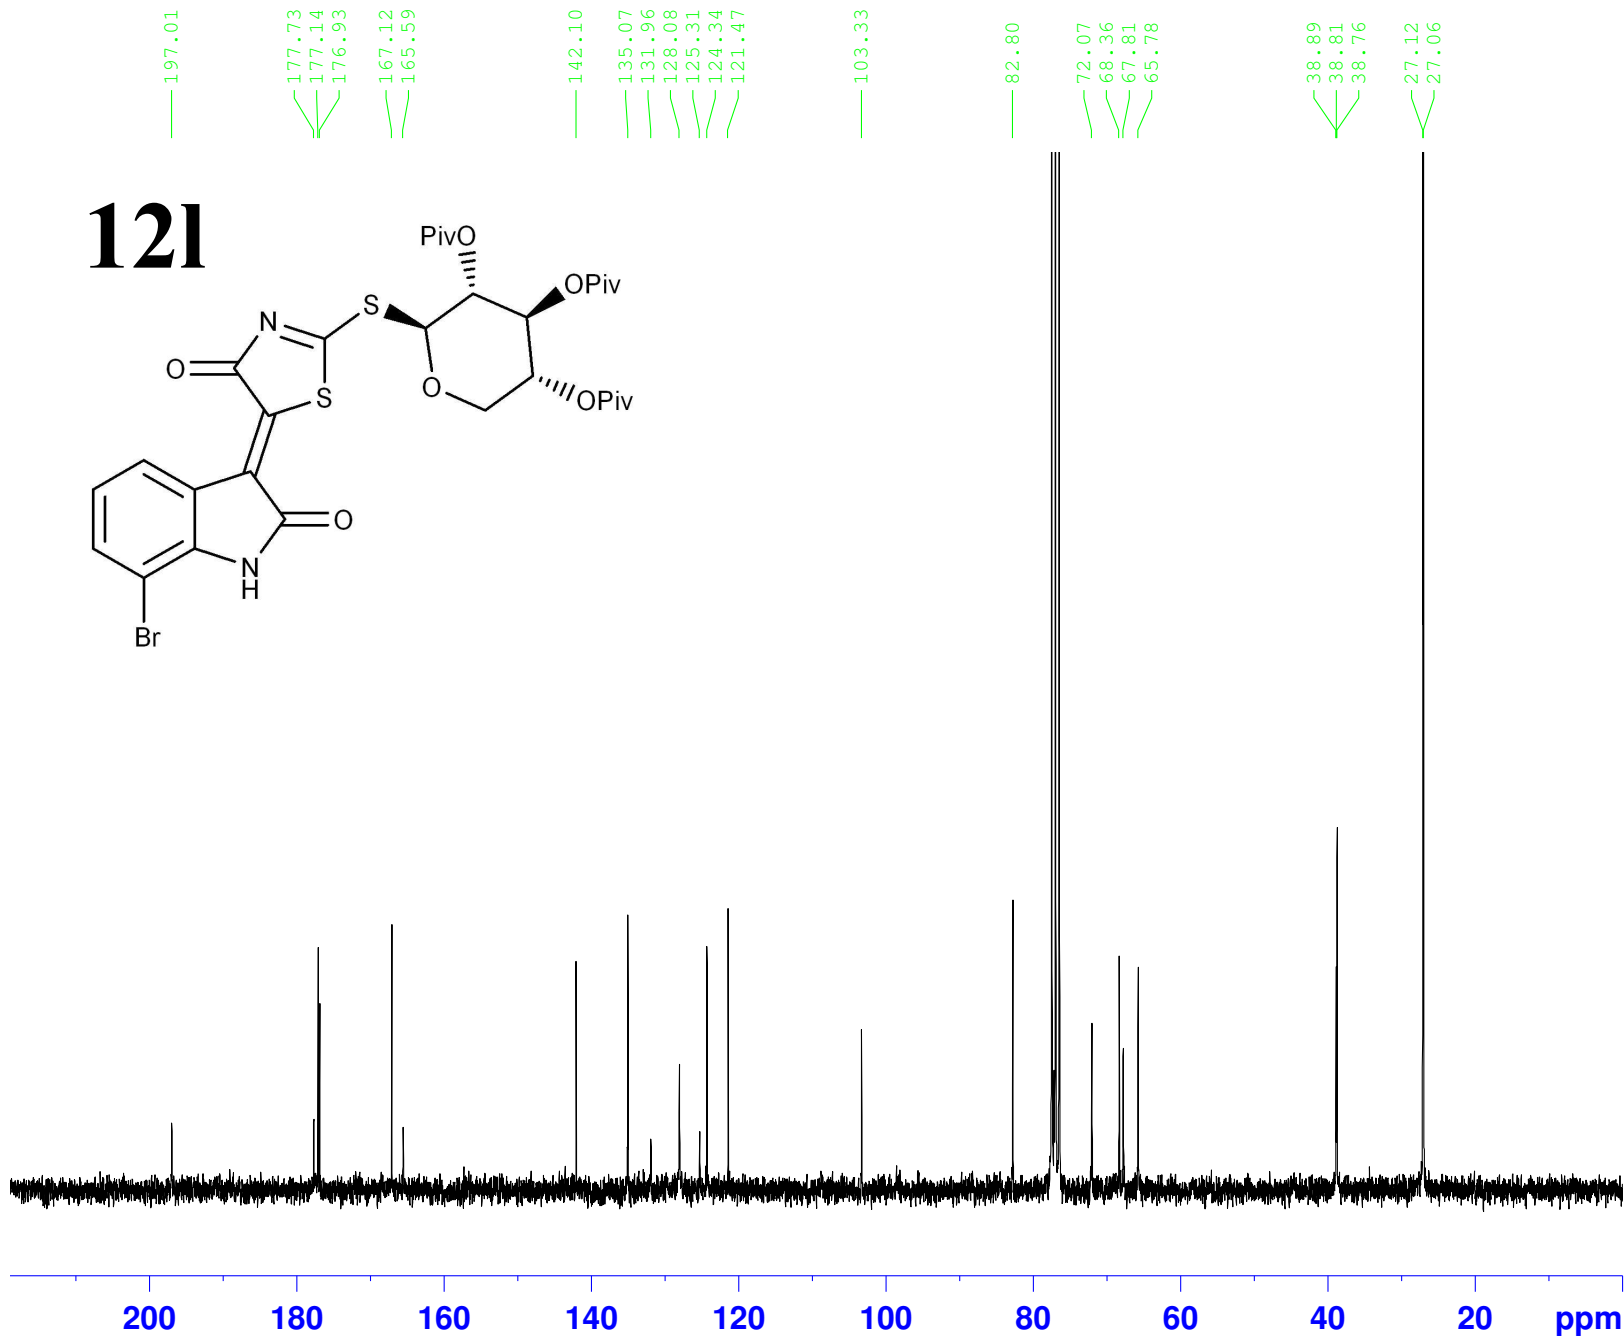

NAME 110705.202  
EXPNO 10  
PROCNO 1  
Date\_ 20110705  
Time 14.18  
INSTRUM spect  
PROBHD 5 mm PABBO BB-  
PULPROG zgpg30  
TD 65536  
SOLVENT CDCl3  
NS 2048  
DS 4  
SWH 15000.000 Hz  
FIDRES 0.228882 Hz  
AQ 2.1845834 sec  
RG 2050  
DW 33.333 usec  
DE 10.00 usec  
TE 298.9 K  
D1 2.00000000 sec  
d11 0.03000000 sec  
DELTA 1.89999998 sec  
TD0 1

==== CHANNEL f1 =====  
NUC1 13C  
P1 10.00 usec  
PL1 -1.00 dB  
SFO1 62.9015280 MHz

==== CHANNEL f2 =====  
CPDPRG2 waltz16  
NUC2 1H  
PCPD2 70.00 usec  
PL12 15.00 dB  
PL13 15.00 dB  
PL2 -2.50 dB  
SFO2 250.1310005 MHz  
SI 32768  
SF 62.8952393 MHz  
WDW EM  
SSB 0  
LB 1.00 Hz  
GB 0  
PC 1.40

Erben 1H, DMSO

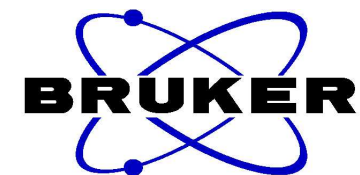

12m

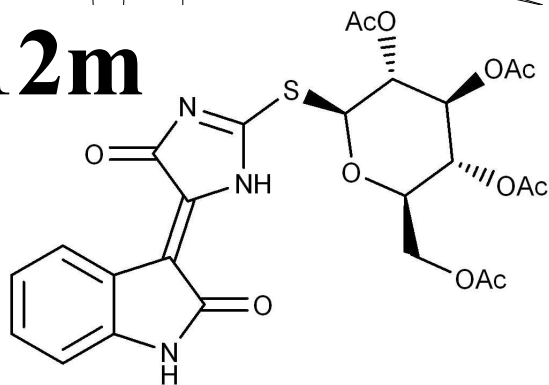

11.758  
11.537  
11.108

8.507  
8.492  
7.370  
7.355  
7.340  
7.074  
7.059  
7.044  
6.941  
6.926  
6.402  
6.204  
6.185  
6.050  
6.034  
5.862  
5.844  
5.825  
5.602  
5.583  
5.564  
5.043  
5.023  
5.003  
4.176  
4.166  
4.150  
4.142  
4.103  
4.080  
2.034  
2.007  
1.977  
1.882

NAME 100928.502  
EXPNO 10  
PROCNO 1  
Date\_ 20100928  
Time 17.03  
INSTRUM spect  
PROBHD 5 mm BBO BB-1H  
PULPROG zg30  
TD 65536  
SOLVENT DMSO  
NS 32  
DS 2  
SWH 15015.015 Hz  
FIDRES 0.229111 Hz  
AQ 2.1824322 sec  
RG 161.3  
DW 33.300 usec  
DE 6.00 usec  
TE 300.0 K  
D1 1.0000000 sec

===== CHANNEL f1 =====  
NUC1 1H  
P1 8.60 usec  
PL1 -3.00 dB  
SFO1 500.1350013 MHz  
SI 32768  
SF 500.1300046 MHz  
WDW EM  
SSB 0  
LB 0.30 Hz  
GB 0  
PC 1.00

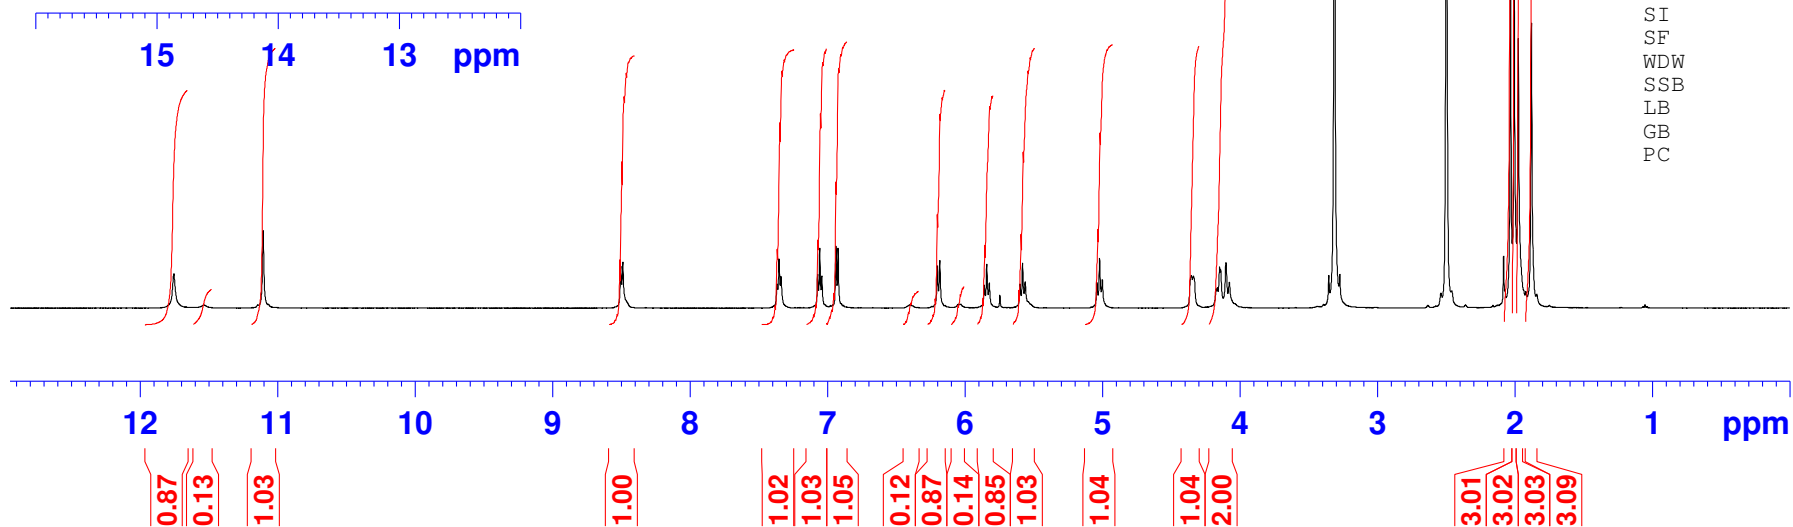

Erben 13C DMSO

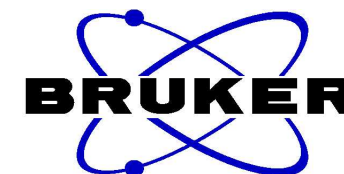

12m

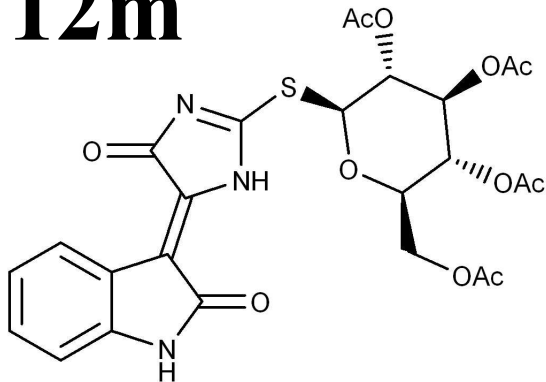

176.23  
170.13  
169.69  
169.67  
169.53  
169.18  
162.22

143.06

131.78  
129.90  
126.31  
122.26  
119.92

110.67  
110.39

80.49  
73.05  
72.27  
67.84  
67.57  
61.69

20.70  
20.55  
20.45  
20.39

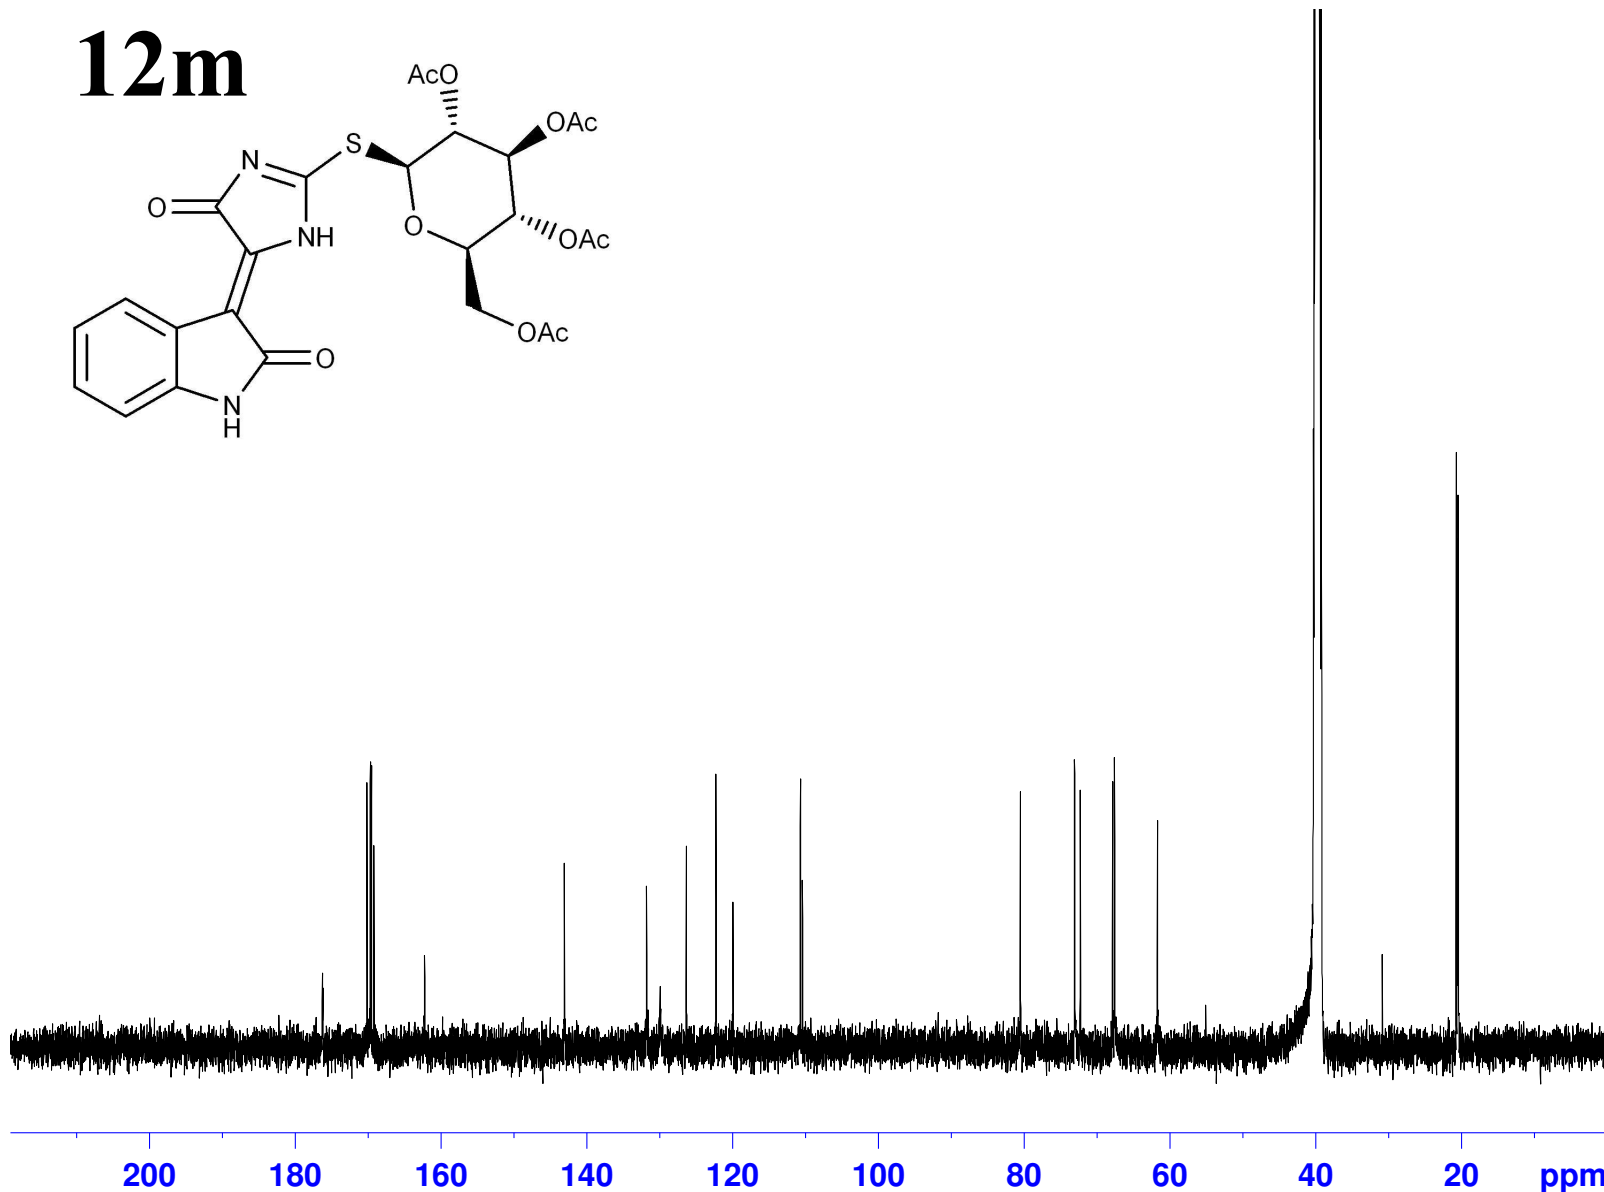

NAME 100928.502  
EXPNO 16  
PROCNO 1  
Date\_ 20100929  
Time 9.24  
INSTRUM spect  
PROBHD 5 mm BBO BB-1H  
PULPROG zgpg30  
TD 65536  
SOLVENT DMSO  
NS 10240  
DS 4  
SWH 30030.029 Hz  
FIDRES 0.458222 Hz  
AQ 1.0912410 sec  
RG 114  
DW 16.650 usec  
DE 6.00 usec  
TE 300.0 K  
D1 2.00000000 sec  
d11 0.03000000 sec  
d12 0.00002000 sec

===== CHANNEL f1 =====  
NUC1 13C  
P1 9.00 usec  
PL1 4.80 dB  
SFO1 125.7703643 MHz

===== CHANNEL f2 =====  
CPDPRG2 waltz16  
NUC2 1H  
PCPD2 80.00 usec  
PL2 -3.00 dB  
PL12 17.50 dB  
PL13 20.00 dB  
SFO2 500.1320005 MHz  
SI 32768  
SF 125.7578277 MHz  
WDW EM  
SSB 0  
LB 1.00 Hz  
GB 0  
PC 1.40
